# Supplementary material for: Tuneable access to isoquinolines via a transition-metal-free C(sp3)–C(sp3) bond cleavage rearrangement reaction
Source: Royal Society of Chemistry journal article supplement (doi:10.1039/c9qo00427k), 2019-01-01

**SUPPORTING INFORMATION**

**Tuneable Access to Isoquinolines *via* a Transition-Metal-Free  
C(sp<sup>3</sup>)-C(sp<sup>3</sup>) Bond Cleavage Rearrangement Reaction**

Jian Wang,<sup>\*</sup> Panyuan Cai, Yimiao He, Yuan Liu, Ling Zhong, Shumin Ding, and Yongjia Shang<sup>\*</sup>

**Contents**

|                                                                                          |    |
|------------------------------------------------------------------------------------------|----|
| I. General Information .....                                                             | 1  |
| II. Preparation of Starting Materials .....                                              | 1  |
| III. Synthesis of 1-CF <sub>3</sub> -Dihydroisoquinoline Compounds 4.....                | 11 |
| IV. Detailed Optimization and General Procedures of the C-C Bond Cleavage Reactions..... | 14 |
| V. Mechanism of the Formation of Products 2v, 7 and 8 .....                              | 15 |
| VI. Characterization Data.....                                                           | 16 |
| VII. References.....                                                                     | 31 |
| VIII. Copies of <sup>1</sup> H and <sup>13</sup> C NMR Spectra.....                      | 32 |
| IX. X-Ray Crystal of Compound 9 .....                                                    | 99 |

## I. General Information

$^1\text{H}$  NMR (500 MHz) and  $^{13}\text{C}$  NMR (125 MHz) were registered on 500 M spectrometers. Chemical shifts were reported in units (ppm) by assigning TMS resonance in the  $^1\text{H}$  spectrum as 0.00 ppm,  $\text{CDCl}_3$  resonance in the  $^{13}\text{C}$  spectrum as 77.0 ppm. All coupling constants ( $J$  values) were reported in Hertz (Hz). NMR analysis was carried out at 298 K unless noted otherwise. HRMS was obtained on an ESI-LC-MS/MS or APCI-LC-MS/MS spectrometer.

## II. Preparation of Starting Materials

### ethyl 2-benzyl-2-isocyano-4-methylpentanoate (**C1**)<sup>1</sup>

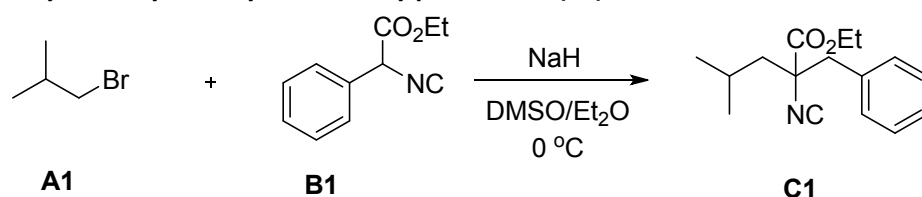

An oven-dried 100 mL schlenk tube charged with **B1** (5 mmol) was refilled with Ar for 3 times. The mixture of 16 mL of  $\text{Et}_2\text{O}$  and 4 mL of DMSO was added by syringe and the reaction mixture was cooled to 0 °C. After NaH (60%) (15 mmol, 3.0 equiv) being added slowly, the reaction mixture was stirred for 20 min. Then 3.0 equivalent of **A1** was added by syringe. After the reaction completed, the crude reaction mixture was quenched with saturated  $\text{NH}_4\text{Cl}$  ( $\text{H}_2\text{O}$ ), extracted with DCM (20 mL  $\times$  3) and washed with brine (50 mL). The organic phase was concentrated in vacuo and the residue was purified by silica gel flash column chromatography to afford **C1** as a colorless oil in 86% yield.

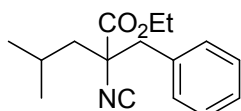

### ethyl 2-benzyl-2-isocyano-4-methylpentanoate (**C1**)

Colorless oil.  $^1\text{H}$  NMR (400 MHz,  $\text{CDCl}_3$ )  $\delta$  7.37-7.32 (m, 3H), 7.30-7.26 (m, 2H), 4.18-4.12 (m, 2H), 3.21 (d,  $J = 13.6$  Hz, 1H), 3.01 (d,  $J = 13.6$  Hz, 1H), 2.07-1.92 (m, 2H), 1.85-1.81 (m, 1H), 1.20 (t,  $J = 7.2$  Hz, 3H), 1.05 (d,  $J = 6.4$  Hz, 2H), 0.90 (d,  $J = 6.4$  Hz, 2H).  $^{13}\text{C}$  NMR (100 MHz,  $\text{CDCl}_3$ )  $\delta$  168.8, 160.4, 133.6, 130.3, 128.4, 127.9, 68.5, 62.5, 46.9, 46.4, 25.1, 23.7, 22.1, 13.9. HRMS (ESI) calcd for  $\text{C}_{16}\text{H}_{21}\text{NO}_2$  [ $\text{M}+\text{H}$ ] $^+$ : 260.1645, Found: 260.1643.

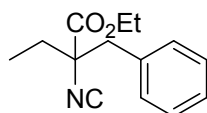

### (S)-ethyl 2-benzyl-2-isocyanobutanoate (**C2**)

This compound was prepared similarly to **C1**. Colorless oil. 89% yield.  $^1\text{H}$  NMR (400 MHz,  $\text{CDCl}_3$ )  $\delta$  7.33-7.26 (m, 5H), 4.18 (q,  $J = 7.1$  Hz, 2H), 3.23 (d,  $J = 13.6$  Hz, 1H), 3.04 (d,  $J = 13.6$  Hz, 1H), 2.15-2.06 (m, 1H), 1.91-1.82 (m, 1H), 1.21 (dd,  $J = 7.8, 6.4$  Hz, 3H), 1.06 (dd,  $J = 9.6, 5.2$  Hz, 3H).  $^{13}\text{C}$  NMR (100 MHz,  $\text{CDCl}_3$ )  $\delta$  168.3, 160.0, 133.9, 130.2, 128.4, 127.8, 70.1, 62.5, 44.6, 32.5, 14.0, 8.6. HRMS (ESI) calcd for  $\text{C}_{14}\text{H}_{17}\text{NO}_2$  [ $\text{M}+\text{H}$ ] $^+$ : 232.1332, Found: 232.1338.

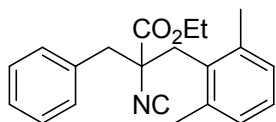

**(S)-ethyl 2-benzyl-3-(2,6-dimethylphenyl)-2-isocyanopropanoate (C3)**

This compound was prepared similarly to **C1**. Colorless oil. 85% yield.  $^1\text{H}$  NMR (400 MHz,  $\text{CDCl}_3$ )  $\delta$  7.35-7.33 (m, 5H), 7.15-7.07 (m, 3H), 4.17-4.08 (m, 2H), 3.58 (d,  $J = 14.7$  Hz, 1H), 3.48-3.40 (m, 2H), 3.12 (d,  $J = 13.4$  Hz, 1H), 2.35 (s, 1H), 1.15 (t,  $J = 7.2$  Hz, 1H).  $^{13}\text{C}$  NMR (100 MHz,  $\text{CDCl}_3$ )  $\delta$  169.0, 162.0, 138.2, 133.7, 131.6, 130.6, 128.7, 128.4, 127.9, 127.5, 69.0, 62.9, 45.6, 37.8, 21.2, 13.8. HRMS (ESI) calcd for  $\text{C}_{21}\text{H}_{23}\text{NO}_2$   $[\text{M}+\text{H}]^+$ : 322.1802, Found: 322.1800.

**ethyl 3-benzyl-1-phenyl-3,4-dihydroisoquinoline-3-carboxylate (1a)<sup>1</sup>**

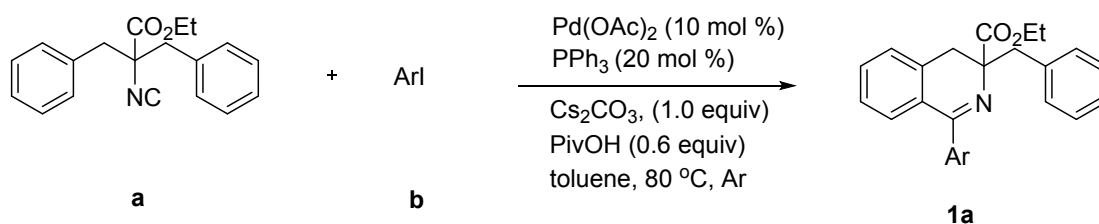

Compound **1a** was prepared according to similar route of literature reported methods: An oven-dried 25 mL schlenk tube charged with  $\text{Pd}(\text{OAc})_2$  (0.1 mmol, 22.4 mg, 10 mol%) triphenylphosphine (0.2 mmol, 52.4 mg, 20 mol%) and  $\text{Cs}_2\text{CO}_3$  (1 mmol, 326 mg, 1.0 equiv) was refilled with Ar for 3 times. Then a solution of **b** (1.5 mmol, 1.5 equiv) and PivOH (0.6 mmol, 61 mg, 0.6 equiv) in 0.5 mL of toluene was added by syringe and the tube was placed in an 80 °C oil-bath. A solution of **a** (1 mmol, 1.0 equiv) in 1.0 mL of toluene was added dropwise with a syringe pump to the reaction mixture. The addition was finished within 1 h. The crude reaction mixture was extracted with EtOAc (20 mL  $\times$  3) and washed with brine (20 mL). The organic phase was concentrated in *vacuo* and the residue was purified by silica gel flash column chromatography to afford the corresponding products.

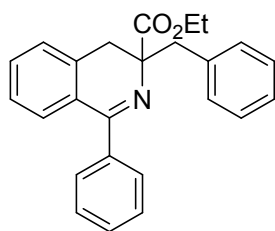

**ethyl 3-benzyl-1-phenyl-3,4-dihydroisoquinoline-3-carboxylate (1a)**

Colorless oil, 81%.  $^1\text{H}$  NMR (500 MHz,  $\text{CDCl}_3$ )  $\delta$  7.67 (dd,  $J = 7.5, 2.0$  Hz, 2H), 7.47-7.39 (m, 4H), 7.27-7.19 (m, 8H), 4.07-4.03 (m, 2H), 3.35 (d,  $J = 13.5$  Hz, 1H), 3.25 (d,  $J = 16.0$  Hz, 1H), 3.11 (d,  $J = 11.0$  Hz, 1H), 2.95 (d,  $J = 16.0$  Hz, 1H), 1.09 (t,  $J = 7.0$  Hz, 3H).  $^{13}\text{C}$  NMR (125 MHz,  $\text{CDCl}_3$ )  $\delta$  174.0, 167.8, 137.0, 136.9, 131.8, 130.9, 130.1, 129.7, 128.8, 128.7, 128.6, 128.4, 127.3, 127.1, 67.4, 61.5, 43.1, 33.6, 14.4; HRMS (ESI) calcd for  $\text{C}_{25}\text{H}_{24}\text{NO}_2$   $[\text{M}+\text{H}]^+$ : 370.1802, Found: 370.1805.

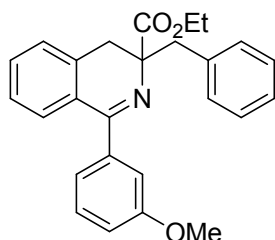

**ethyl 3-benzyl-1-(3-methoxyphenyl)-3,4-dihydroisoquinoline-3-carboxylate (1b)**

This compound was prepared similarly to **1a**. Colorless oil, 70% yield. <sup>1</sup>H NMR (500 MHz, CDCl<sub>3</sub>) δ 7.41 (td, *J* = 7.5, 1.5 Hz, 1H), 7.36 (t, *J* = 8.0 Hz, 1H), 7.31- 7.24 (m, 5H), 7.23-7.20 (m, 5H), 7.03-7.01 (m, 1H), 4.06 (qd, *J* = 7.0, 1.5 Hz, 2H), 3.85 (s, 3H), 3.34 (d, *J* = 13.5 Hz, 1H), 3.26 (d, *J* = 16.0 Hz, 1H), 3.07 (d, *J* = 13.5 Hz, 1H), 2.95 (d, *J* = 16.0 Hz, 1H), 1.10 (t, *J* = 7.0 Hz, 3H). <sup>13</sup>C NMR (125 MHz, CDCl<sub>3</sub>) δ 173.7, 167.3, 159.9, 140.4, 137.0, 136.9, 131.7, 130.9, 129.5, 128.8, 128.7, 128.4, 127.3, 127.1, 122.1, 116.0, 114.8, 67.4, 61.5, 55.8, 43.1, 33.3, 14.4; HRMS (APCI) calcd for C<sub>26</sub>H<sub>25</sub>NO<sub>3</sub> [M+H]<sup>+</sup>: 400.1907, Found: 400.1910.

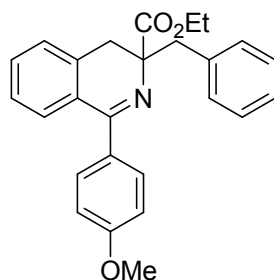**ethyl 3-benzyl-1-(4-methoxyphenyl)-3,4-dihydroisoquinoline-3-carboxylate (1c)**

This compound was prepared similarly to **1a**. Colorless oil, 79% yield. <sup>1</sup>H NMR (500 MHz, CDCl<sub>3</sub>) δ 7.64 (d, *J* = 7.5, 2H), 7.39 (td, *J* = 7.5, 1.0 Hz, 1H), 7.31-7.31 (m, 1H), 7.25-7.19 (m, 7H), 7.01-6.91 (m, 2H), 4.05-4.01 (m, 2H), 3.85 (s, 3H), 3.32 (d, *J* = 13.5 Hz, 1H), 3.23 (d, *J* = 16.0 Hz, 1H), 3.03 (d, *J* = 13.5 Hz, 1H), 2.92 (d, *J* = 16.0 Hz, 1H), 1.07 (t, *J* = 7.0 Hz, 3H). <sup>13</sup>C NMR (125 MHz, CDCl<sub>3</sub>) δ 173.4, 166.3, 160.9, 136.8, 136.7, 131.1, 130.8, 130.4, 128.5, 128.4, 128.3, 128.0, 126.8, 126.6, 113.5, 66.8, 61.0, 55.4, 42.7, 33.0, 14.0; HRMS (APCI) calcd for C<sub>26</sub>H<sub>25</sub>NO<sub>3</sub> [M+H]<sup>+</sup>: 400.1907, Found: 400.1909.

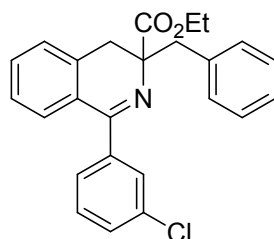**ethyl 3-benzyl-1-(3-chlorophenyl)-3,4-dihydroisoquinoline-3-carboxylate (1d)**

This compound was prepared similarly to **1a**. Colorless oil, 90% yield. <sup>1</sup>H NMR (500 MHz, CDCl<sub>3</sub>) δ 7.67 (t, *J* = 2.0 Hz, 1H), 7.53 (d, *J* = 7.5 Hz, 1H), 7.46-7.37 (m, 3H), 7.29-7.20 (m, 8H), 4.10-4.05 (m, 2H), 3.33 (d, *J* = 13.5 Hz, 1H), 3.25 (d, *J* = 16.0 Hz, 1H), 3.07 (d, *J* = 13.5 Hz, 1H), 2.95 (d, *J* = 16.0 Hz, 1H), 1.11 (t, *J* = 7.0 Hz, 3H). <sup>13</sup>C NMR (125 MHz, CDCl<sub>3</sub>) δ 173.6, 166.28, 140.8, 136.9, 136.8, 134.7, 132.0, 130.9, 130.1, 129.9, 129.7, 128.9, 128.4, 128.4, 127.8, 127.5, 127.2, 67.5, 61.6, 43.0, 33.2, 14.4; HRMS (APCI) calcd for C<sub>25</sub>H<sub>20</sub>Cl<sub>2</sub>NO<sub>2</sub> [M+H]<sup>+</sup>: 472.0632, Found: 472.0627.

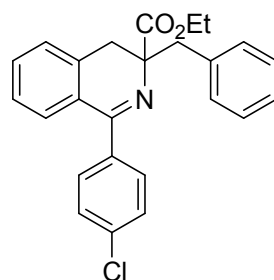**ethyl 3-benzyl-1-(4-chlorophenyl)-3,4-dihydroisoquinoline-3-carboxylate (1e)**

This compound was prepared similarly to **1a**. Colorless oil, 76% yield.  $^1\text{H}$  NMR (500 MHz,  $\text{CDCl}_3$ )  $\delta$  7.62 (d,  $J = 8.2$  Hz, 2H), 7.47 (dd,  $J = 56.0, 48.0$  Hz, 3H), 7.28-7.20 (m, 8H), 4.05 (q,  $J = 7.0$  Hz, 2H), 3.32 (d,  $J = 13.5$  Hz, 1H), 3.24 (d,  $J = 16.0$  Hz, 1H), 3.11 (d,  $J = 12.0$  Hz, 1H), 2.95 (d,  $J = 16.0$  Hz, 1H), 1.08 (t,  $J = 7.0$  Hz, 3H).  $^{13}\text{C}$  NMR (125 MHz,  $\text{CDCl}_3$ )  $\delta$  173.1, 166.5, 136.7, 136.4, 131.6, 130.7, 130.5, 130.1, 129.7, 128.5, 128.5, 128.0, 127.0, 126.8, 67.0, 61.2, 42.7, 33.0, 14.0; HRMS (ESI) calcd for  $\text{C}_{25}\text{H}_{22}\text{ClNO}_2$   $[\text{M}+\text{H}]^+$ : 404.1412, Found: 404.1418.

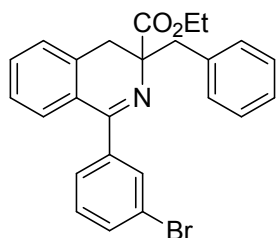

**ethyl 3-benzyl-1-(3-bromophenyl)-3,4-dihydroisoquinoline-3-carboxylate (1f)**

This compound was prepared similarly to **1a**. Colorless oil, 78% yield.  $^1\text{H}$  NMR (500 MHz,  $\text{CDCl}_3$ )  $\delta$  7.81 (t,  $J = 1.5$  Hz, 1H), 7.60-7.55 (m, 2H), 7.41 (td,  $J = 7.5, 1.5$  Hz, 1H), 7.31 (t,  $J = 8.0$  Hz, 1H), 7.27-7.18 (m, 8H), 4.08-4.04 (m, 2H), 3.31 (d,  $J = 13.5$  Hz, 1H), 3.24 (d,  $J = 16.0$  Hz, 1H), 3.05 (d,  $J = 13.5$  Hz, 1H), 2.93 (d,  $J = 16.0$  Hz, 1H), 1.10 (t,  $J = 7.0$  Hz, 3H).  $^{13}\text{C}$  NMR (125 MHz,  $\text{CDCl}_3$ )  $\delta$  173.1, 165.7, 140.6, 136.5, 136.4, 132.5, 132.1, 131.5, 130.4, 129.7, 128.5, 128.0, 127.9, 127.9, 127.8, 127.0, 126.7, 122.4, 67.0, 61.2, 42.6, 32.8, 14.0; HRMS (APCI) calcd for  $\text{C}_{25}\text{H}_{23}\text{BrNO}_2$   $[\text{M}+\text{H}]^+$ : 448.0907, Found: 448.0910.

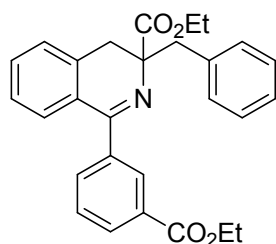

**ethyl 3-benzyl-1-(3-(ethoxycarbonyl)phenyl)-3,4-dihydroisoquinoline-3-carboxylate (1g)**

This compound was prepared similarly to **1a**. Colorless oil, 93% yield.  $^1\text{H}$  NMR (500 MHz,  $\text{CDCl}_3$ )  $\delta$  8.30 (t,  $J = 1.5$  Hz, 1H), 8.17-8.15 (m, 1H), 7.87 (d,  $J = 7.5$  Hz, 1H), 7.54 (t,  $J = 7.7$  Hz, 1H), 7.42 (td,  $J = 7.5, 1.0$  Hz, 1H), 7.29 – 7.20 (m, 8H), 4.40 (q,  $J = 7.1$  Hz, 2H), 4.09-4.05 (m, 2H), 3.34 (d,  $J = 13.5$  Hz, 1H), 3.27 (d,  $J = 16.0$  Hz, 1H), 3.08 (d,  $J = 13.5$  Hz, 1H), 2.96 (d,  $J = 16.0$  Hz, 1H), 1.40 (t,  $J = 7.0$  Hz, 3H), 1.11 (t,  $J = 7.0$  Hz, 3H).  $^{13}\text{C}$  NMR (125 MHz,  $\text{CDCl}_3$ )  $\delta$  173.6, 166.7, 139.4, 136.9, 136.9, 134.0, 131.9, 131.0, 130.9, 130.8, 130.6, 128.9, 128.8, 128.5, 128.4, 128.3, 127.5, 127.1, 67.5, 61.6, 61.5, 43.0, 33.2, 14.8, 14.4; HRMS (APCI) calcd for  $\text{C}_{28}\text{H}_{28}\text{NO}_4$   $[\text{M}+\text{H}]^+$ : 442.2013, Found: 442.2016.

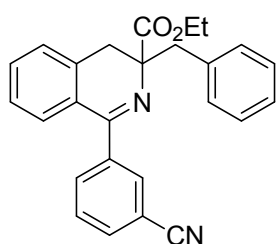

**ethyl 3-benzyl-1-(3-cyanophenyl)-3,4-dihydroisoquinoline-3-carboxylate (1h)**

This compound was prepared similarly to **1a**. Colorless oil, 84% yield.  $^1\text{H}$  NMR (500 MHz,  $\text{CDCl}_3$ )  $\delta$  7.98 (t,  $J = 1.3$  Hz, 1H), 7.91-7.89 (m, 1H), 7.76-7.73 (m, 1H), 7.56 (t,  $J = 8.0$  Hz, 1H), 7.44 (td,  $J =$

7.5, 1.0 Hz, 1H), 7.31-7.16 (m, 8H), 4.07 (qd,  $J = 7.0, 1.5$  Hz, 2H), 3.32-3.25 (m, 2H), 3.09 (d,  $J = 13.5$  Hz, 1H), 2.97 (d,  $J = 16.0$  Hz, 1H), 1.10 (t,  $J = 7.0$  Hz, 3H).  $^{13}\text{C}$  NMR (125 MHz,  $\text{CDCl}_3$ )  $\delta$  173.4, 165.6, 140.2, 137.0, 136.7, 133.9, 133.4, 133.3, 132.3, 130.8, 129.5, 129.1, 128.5, 128.0, 127.6, 127.3, 119.0, 112.9, 67.6, 61.7, 43.0, 33.3, 14.4; HRMS (APCI) calcd for  $\text{C}_{26}\text{H}_{23}\text{N}_2\text{O}_2$   $[\text{M}+\text{H}]^+$ : 395.1754, Found: 395.1758.

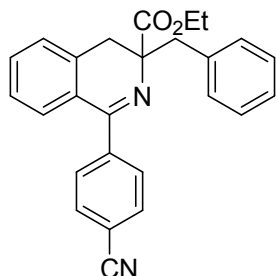

**ethyl 3-benzyl-1-(4-cyanophenyl)-3,4-dihydroisoquinoline-3-carboxylate (1i)**

This compound was prepared similarly to **1a**. Colorless oil, 86% yield.  $^1\text{H}$  NMR (500 MHz,  $\text{CDCl}_3$ )  $\delta$  7.78-7.74 (m, 4H), 7.44 (td,  $J = 7.5, 1.0$  Hz, 1H), 7.31-7.15 (m, 8H), 4.08-4.03 (m, 2H), 3.30 (d,  $J = 13.5$  Hz, 1H), 3.26 (d,  $J = 16.0$  Hz, 1H), 3.10 (d,  $J = 13.5$  Hz, 1H), 2.96 (d,  $J = 16.0$  Hz, 1H), 1.09 (t,  $J = 7.0$  Hz, 3H).  $^{13}\text{C}$  NMR (125 MHz,  $\text{CDCl}_3$ )  $\delta$  173.3, 166.1, 143.2, 136.9, 136.6, 132.5, 132.3, 130.8, 130.3, 129.1, 128.5, 128.0, 128.0, 127.6, 127.2, 119.0, 113.6, 67.6, 61.7, 43.0, 33.3, 14.4. HRMS (ESI) calcd for  $\text{C}_{26}\text{H}_{22}\text{N}_2\text{O}_2$   $[\text{M}+\text{H}]^+$ : 395.1754, Found: 395.1758.

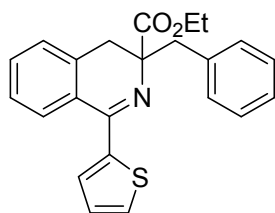

**ethyl 3-benzyl-1-(thiophen-2-yl)-3,4-dihydroisoquinoline-3-carboxylate (1j)**

This compound was prepared similarly to **1a**. Colorless oil, 66% yield.  $^1\text{H}$  NMR (500 MHz,  $\text{CDCl}_3$ )  $\delta$  7.71 (d,  $J = 7.5$  Hz, 1H), 7.49-7.48 (m, 1H), 7.44-7.41 (m, 2H), 7.34-7.20 (m, 7H), 7.12 (dd,  $J = 5.0, 3.5$  Hz, 1H), 4.05-3.96 (m, 2H), 3.29 (d,  $J = 13.5$  Hz, 1H), 3.21 (d,  $J = 15.5$  Hz, 1H), 3.13 (d,  $J = 13.5$  Hz, 1H), 2.89 (d,  $J = 15.5$  Hz, 1H), 1.02 (t,  $J = 7.0$  Hz, 3H).  $^{13}\text{C}$  NMR (125 MHz,  $\text{CDCl}_3$ )  $\delta$  173.1, 160.4, 143.1, 136.7, 136.6, 131.1, 130.7, 129.4, 128.8, 128.5, 127.9, 127.3, 127.1, 127.0, 126.6, 66.8, 61.0, 43.1, 33.6, 13.9; HRMS (APCI) calcd for  $\text{C}_{23}\text{H}_{21}\text{NO}_2\text{S}$   $[\text{M}+\text{H}]^+$ : 376.1366, Found: 376.1362.

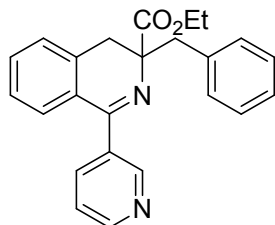

**ethyl 3-benzyl-1-(pyridin-3-yl)-3,4-dihydroisoquinoline-3-carboxylate (1k)**

This compound was prepared similarly to **1a**. Colorless oil, 77% yield.  $^1\text{H}$  NMR (500 MHz,  $\text{CDCl}_3$ )  $\delta$  8.89 (d,  $J = 1.5$  Hz, 1H), 8.70 (dd,  $J = 5.0, 1.5$  Hz, 1H), 7.99 (dt,  $J = 7.5, 2.0$  Hz, 1H), 7.44-7.38 (m, 2H), 7.29-7.19 (m, 8H), 4.07-4.02 (m, 2H), 3.31-3.24 (m, 2H), 3.09 (d,  $J = 13.5$  Hz, 1H), 2.96 (d,  $J = 16.0$  Hz, 1H), 1.08 (t,  $J = 7.0$  Hz, 3H).  $^{13}\text{C}$  NMR (125 MHz,  $\text{CDCl}_3$ )  $\delta$  173.1, 164.6, 150.4, 150.1, 136.8, 136.4, 136.4, 134.4, 131.7, 130.4, 128.6, 128.0, 127.8, 127.6, 127.2, 126.8, 123.2, 67.1,

61.2, 42.8, 33.0, 14.0; HRMS (APCI) calcd for C<sub>24</sub>H<sub>22</sub>N<sub>2</sub>O<sub>2</sub> [M+H]<sup>+</sup>: 371.1754, Found: 371.1753.

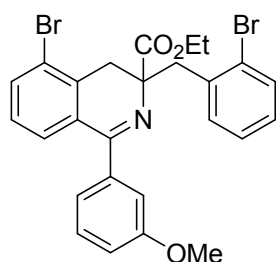

**ethyl 5-bromo-3-(2-bromobenzyl)-1-(3-methoxyphenyl)-3,4-dihydroisoquinoline-3-carboxylate (1l)**

This compound was prepared similarly to **1a**. Colorless oil, 65% yield. <sup>1</sup>H NMR (500 MHz, CDCl<sub>3</sub>) δ 7.59 (d, *J* = 8.0 Hz, 1H), 7.53-7.50 (m, 2H), 7.34 (t, *J* = 8.0 Hz, 1H), 7.21-7.14 (m, 4H), 7.09-7.00 (m, 3H), 4.11-4.04 (m, 2H), 3.84 (s, 3H), 3.66-3.55 (m, 3H), 2.99 (d, *J* = 16.5 Hz, 1H), 1.10 (t, *J* = 7.0 Hz, 3H). <sup>13</sup>C NMR (125 MHz, CDCl<sub>3</sub>) δ 172.6, 167.1, 159.4, 139.5, 136.4, 136.3, 135.1, 132.7, 132.5, 130.3, 129.1, 128.2, 127.9, 127.4, 127.0, 126.1, 124.3, 121.7, 115.8, 114.4, 66.9, 61.4, 55.4, 42.6, 33.4, 13.9; HRMS (APCI) calcd for C<sub>26</sub>H<sub>23</sub>Br<sub>2</sub>NO<sub>3</sub> [M+H]<sup>+</sup>: 556.0117, Found: 556.0118.

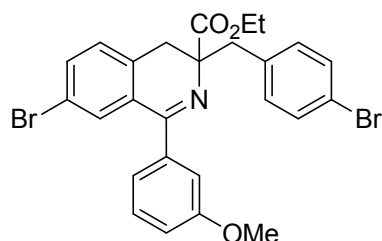

**ethyl 7-bromo-3-(4-bromobenzyl)-1-(3-methoxyphenyl)-3,4-dihydroisoquinoline-3-carboxylate (1m)**

This compound was prepared similarly to **1a**. Colorless oil, 89% yield. <sup>1</sup>H NMR (500 MHz, CDCl<sub>3</sub>) δ 7.52 (dd, *J* = 8.0, 2.0 Hz, 1H), 7.42 (d, *J* = 2.0 Hz, 1H), 7.39-7.36 (m, 3H), 7.18-7.16 (m, 2H), 7.14-7.11 (m, 3H), 7.06-7.03 (m, 1H), 4.02 (q, *J* = 7.0 Hz, 2H), 3.86 (s, 3H), 3.25 (d, *J* = 13.5 Hz, 1H), 3.19 (d, *J* = 16.0 Hz, 1H), 3.11 (d, *J* = 13.5 Hz, 1H), 2.84 (d, *J* = 16.0 Hz, 1H), 1.07 (t, *J* = 7.0 Hz, 3H). <sup>13</sup>C NMR (125 MHz, CDCl<sub>3</sub>) δ 173.1, 166.3, 160.0, 139.5, 135.8, 135.5, 134.5, 132.7, 131.5, 130.3, 130.2, 129.8, 121.9, 121.3, 120.9, 116.4, 114.7, 67.1, 61.7, 55.8, 43.1, 33.4, 14.4; HRMS (APCI) calcd for C<sub>26</sub>H<sub>23</sub>Br<sub>2</sub>NO<sub>3</sub> [M+H]<sup>+</sup>: 556.0117, Found: 556.0111.

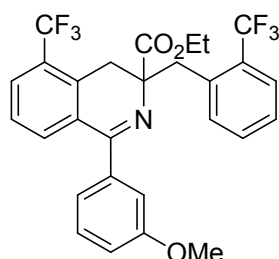

**ethyl 1-(3-methoxyphenyl)-5-(trifluoromethyl)-3-(2-(trifluoromethyl)benzyl)-3,4-dihydroisoquinoline-3-carboxylate (1n)**

This compound was prepared similarly to **1a**. Colorless oil, 68% yield. <sup>1</sup>H NMR (500 MHz, CDCl<sub>3</sub>) δ 7.97 (d, *J* = 8.0 Hz, 1H), 7.69 (d, *J* = 8.0 Hz, 1H), 7.63 (d, *J* = 7.5 Hz, 1H), 7.47 (d, *J* = 8.0 Hz, 1H), 7.43 (t, *J* = 7.5 Hz, 1H), 7.38 (t, *J* = 2.0 Hz, 1H), 7.35-7.28 (m, 2H), 7.20 (s, 1H), 7.17 (d, *J* = 7.5 Hz, 1H), 7.05 (dd, *J* = 8.0, 2.0 Hz, 1H), 3.98-3.93 (m, 2H), 3.86 (s, 3H), 3.76 (d, *J* = 15.0 Hz, 1H), 3.66-

3.60 (m, 2H), 2.88 (d,  $J = 16.5$  Hz, 1H), 0.98 (t,  $J = 7.0$  Hz, 3H).  $^{13}\text{C}$  NMR (125 MHz,  $\text{CDCl}_3$ )  $\delta$  170.9, 166.2, 158.6, 138.4, 134.9, 134.2, 131.3, 130.6, 130.3, 128.4, 128.3 (q,  $J = 31.1$  Hz), 128.2, 127.7, 127.5 (q,  $J = 30.3$  Hz), 127.4, 125.8, 125.5, 124.8 (q,  $J = 5.9$  Hz), 123.5 (q,  $J = 272.1$  Hz), 122.8 (q,  $J = 272.5$  Hz), 120.6, 114.9, 113.4, 64.9, 60.4, 54.4, 38.4, 30.5, 12.6; HRMS (APCI) calcd for  $\text{C}_{28}\text{H}_{21}\text{Br}_2\text{F}_2\text{NO}_3$   $[\text{M}+\text{H}]^+$ : 536.1655, Found: 536.1649.

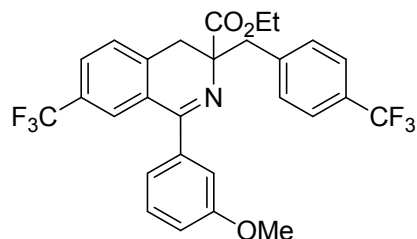

**ethyl 1-(3-methoxyphenyl)-7-(trifluoromethyl)-3-(4-(trifluoromethyl)benzyl)-3,4-dihydroisoquinoline-3-carboxylate (1o)**

This compound was prepared similarly to **1a**. Colorless oil, 84% yield.  $^1\text{H}$  NMR (500 MHz,  $\text{CDCl}_3$ )  $\delta$  7.66-7.65 (m, 1H), 7.55 (br s, 1H), 7.51 (d,  $J = 8.0$  Hz, 2H), 7.41-7.38 (m, 4H), 7.20-7.17 (m, 2H), 7.08-7.06 (m, 2H), 4.03-4.00 (m, 2H), 3.86 (s, 3H), 3.39-3.31 (m, 3H), 2.97 (d,  $J = 16.0$  Hz, 1H), 1.03 (t,  $J = 7.0$  Hz, 3H).  $^{13}\text{C}$  NMR (125 MHz,  $\text{CDCl}_3$ )  $\delta$  172.7, 166.6, 160.1, 140.8, 140.7, 139.1, 131.3, 130.2, 129.9, 129.5 (q,  $J = 32.3$  Hz), 129.2, 129.0, 128.3, 125.2 (q,  $J = 3.5$  Hz), 124.6 (q,  $J = 270.3$  Hz), 124.0 (q,  $J = 270.9$  Hz), 121.9, 116.8, 114.6, 67.0, 61.9, 55.8, 43.7, 34.2, 14.3; HRMS (APCI) calcd for  $\text{C}_{28}\text{H}_{23}\text{F}_6\text{NO}_3$   $[\text{M}+\text{H}]^+$ : 536.1655, Found: 536.1659.

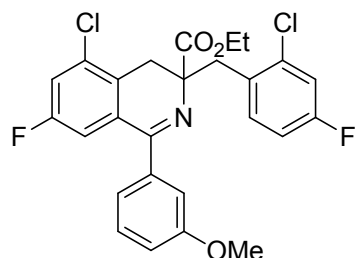

**ethyl 5-chloro-3-(2-chloro-4-fluorobenzyl)-7-fluoro-1-(3-methoxyphenyl)-3,4-dihydroisoquinoline-3-carboxylate (1p)**

This compound was prepared similarly to **1a**. Colorless oil, 96% yield.  $^1\text{H}$  NMR (500 MHz,  $\text{CDCl}_3$ )  $\delta$  7.49 (dd,  $J = 8.7, 6.5$  Hz, 1H), 7.38-7.35 (m, 1H), 7.19 (dd,  $J = 8.0, 2.5$  Hz, 1H), 7.15-7.12 (m, 2H), 7.09-7.02 (m, 2H), 6.92-6.85 (m, 2H), 4.11-4.04 (m, 2H), 3.85 (s, 3H), 3.57-3.48 (m,  $J = 14.0, 10.0$  Hz, 3H), 2.89 (dd,  $J = 16.5, 1.0$  Hz, 1H), 1.11 (t,  $J = 7.0$  Hz, 3H).  $^{13}\text{C}$  NMR (125 MHz,  $\text{CDCl}_3$ )  $\delta$  172.4, 166.0, 161.6, 161.3 (d,  $J = 247.4$  Hz), 159.6, 138.8, 135.7 (d,  $J = 10.0$  Hz), 134.2 (d,  $J = 9.8$  Hz), 133.5 (d,  $J = 8.4$  Hz), 130.7 (d,  $J = 7.4$  Hz), 130.3 (d,  $J = 3.4$  Hz), 130.2 (d,  $J = 3.3$  Hz), 129.4, 121.5, 119.2 (d,  $J = 24.8$  Hz), 116.5 (d,  $J = 24.3$  Hz), 116.0, 114.4, 114.1 (d,  $J = 22.5$  Hz), 113.7 (d,  $J = 20.5$  Hz), 66.8, 61.6, 55.4, 39.4, 30.1, 14.0; HRMS (APCI) calcd for  $\text{C}_{26}\text{H}_{21}\text{Cl}_2\text{F}_2\text{NO}_3$   $[\text{M}+\text{H}]^+$ : 504.0939, Found: 504.0940.

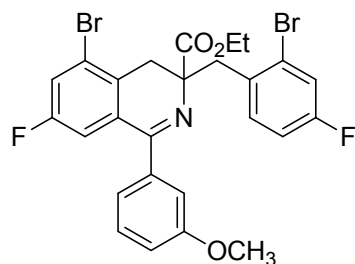



**ethyl 5-bromo-3-(2-bromo-4-fluorobenzyl)-7-fluoro-1-(3-methoxyphenyl)-3,4-dihydroisoquinoline-3-carboxylate (1q)**

This compound was prepared similarly to **1a**. Colorless oil, 76% yield.  $^1\text{H}$  NMR (500 MHz,  $\text{CDCl}_3$ )  $\delta$  7.55 (dd,  $J = 8.5, 6.5$  Hz, 1H), 7.38-7.35 (m, 2H), 7.27 (dd,  $J = 8.5, 1.5$  Hz, 2H), 7.17-7.12 (m, 2H), 7.05 (dd,  $J = 8.0, 2.5$  Hz, 1H), 6.98-6.90 (m, 2H), 4.12-4.04 (m, 2H), 3.86 (s, 3H), 3.61-3.55 (m, 3H), 2.86 (d,  $J = 16.5$  Hz, 1H), 1.11 (t,  $J = 7.0$  Hz, 3H).  $^{13}\text{C}$  NMR (125 MHz,  $\text{CDCl}_3$ )  $\delta$  172.1, 166.5, 161.1 (d,  $J = 248.6$  Hz), 160.7 (d,  $J = 248.9$  Hz), 159.6, 138.3, 133.3 (d,  $J = 8.0$  Hz), 132.1 (d,  $J = 2.9$  Hz), 132.0 (d,  $J = 2.9$  Hz), 130.8 (d,  $J = 6.8$  Hz), 129.4, 125.9 (d,  $J = 9.3$  Hz), 124.1 (d,  $J = 8.9$  Hz), 122.4 (d,  $J = 22.6$  Hz), 121.6, 119.7 (d,  $J = 23.9$  Hz), 116.2, 114.9 (d,  $J = 23.3$  Hz), 114.5, 114.3 (d,  $J = 20.6$  Hz), 67.1, 61.6, 55.4, 41.8, 32.9, 14.0; HRMS (APCI) calcd for  $\text{C}_{26}\text{H}_{21}\text{Br}_2\text{F}_2\text{NO}_3$   $[\text{M}+\text{H}]^+$ : 591.9929, Found: 591.9931.

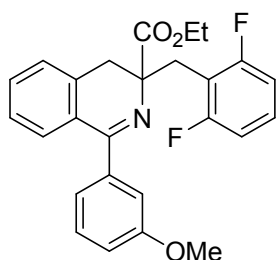

**ethyl 3-(2,6-difluorobenzyl)-1-(3-methoxyphenyl)-3,4-dihydroisoquinoline-3-carboxylate (1r)**

This compound was prepared similarly to **1a**. Colorless oil, 86% yield.  $^1\text{H}$  NMR (500 MHz,  $\text{CDCl}_3$ )  $\delta$  7.26-7.22 (m, 2H), 7.15-7.03 (m, 6H), 6.90 (dd,  $J = 8.0, 2.5$  Hz, 1H), 6.71 (t,  $J = 7.5$  Hz, 2H), 4.01-3.95 (m, 2H), 3.74 (s, 3H), 3.43 (d,  $J = 14.0$  Hz, 1H), 3.24 (d,  $J = 14.0$  Hz, 1H), 3.19 (d,  $J = 16.0$  Hz, 1H), 3.01 (d,  $J = 16.0$  Hz, 1H), 1.03 (t,  $J = 7.0$  Hz, 3H).  $^{13}\text{C}$  NMR (125 MHz,  $\text{CDCl}_3$ )  $\delta$  173.3, 167.6, 162.4 (dd,  $J = 246.3, 8.25$  Hz), 159.9, 140.4, 136.9, 131.5, 129.5, 128.9 (dd,  $J = 10.3$  Hz), 128.7, 128.5, 127.2, 122.1, 116.1, 114.7, 113.3 (dd,  $J = 20.1, 20.1$  Hz), 111.3 (dd,  $J = 26.3, 15.0$  Hz), 66.4, 61.6, 55.7, 33.9, 31.8, 14.3. HRMS (APCI) calcd for  $\text{C}_{26}\text{H}_{23}\text{F}_2\text{NO}_3$   $[\text{M}+\text{H}]^+$ : 436.1719, Found: 436.1726.

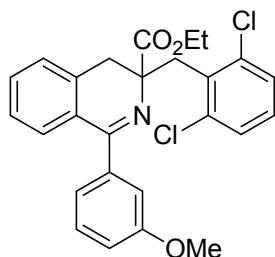

**ethyl 3-(2,6-dichlorobenzyl)-1-(3-methoxyphenyl)-3,4-dihydroisoquinoline-3-carboxylate (1s)**

This compound was prepared similarly to **1a**. Colorless oil, 81% yield.  $^1\text{H}$  NMR (500 MHz,  $\text{CDCl}_3$ )  $\delta$  7.34-7.29 (m, 2H), 7.26-7.25 (m, 3H), 7.23-7.16 (m, 4H), 7.06-7.05 (m, 1H), 7.01-7.00 (m, 1H), 4.00-3.95 (m, 2H), 3.91 (d,  $J = 14.0$  Hz, 1H), 3.84 (s, 3H), 3.80 (d,  $J = 14.0$  Hz, 1H), 3.28 (s, 2H), 0.98 (t,  $J = 7.0$  Hz, 3H).  $^{13}\text{C}$  NMR (125 MHz,  $\text{CDCl}_3$ )  $\delta$  173.1, 167.5, 159.9, 140.3, 137.5, 137.1, 134.3, 131.4, 129.4, 129.0, 128.7, 128.6, 128.5, 128.4, 127.2, 122.3, 116.2, 114.7, 67.1, 61.5, 55.8, 40.2, 35.2, 14.2; HRMS (APCI) calcd for  $\text{C}_{26}\text{H}_{23}\text{Cl}_2\text{NO}_3$   $[\text{M}+\text{H}]^+$ : 468.1128, Found: 468.1123.

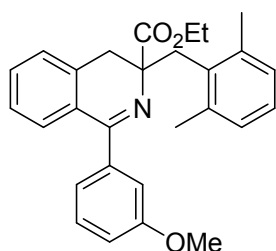

**ethyl 3-(2,6-dimethylbenzyl)-1-(3-methoxyphenyl)-3,4-dihydroisoquinoline-3-carboxylate (1t)**

This compound was prepared similarly to **1a**. Colorless oil. 80% yield.  $^1\text{H}$  NMR (400 MHz,  $\text{CDCl}_3$ )  $\delta$  7.39-7.33 (m,  $J = 7.2, 6.4, 3.2$  Hz, 1H), 7.28-7.22 (m, 2H), 7.05-7.00 (m, 2H), 3.94-3.88 (m, 1H), 3.88 (s, 1H), 3.71 (d,  $J = 14.2$  Hz, 1H), 3.58 (d,  $J = 14.2$  Hz, 1H), 3.32 (d,  $J = 15.2$  Hz, 1H), 2.95 (d,  $J = 15.2$  Hz, 1H), 2.47 (s, 3H), 0.98 (t,  $J = 7.2$  Hz, 3H).  $^{13}\text{C}$  NMR (100 MHz,  $\text{CDCl}_3$ )  $\delta$  173.9, 166.3, 159.4, 140.0, 138.7, 136.9, 134.7, 130.9, 129.0, 128.3, 128.1, 127.8, 126.8, 126.4, 121.7, 115.6, 114.2, 67.9, 60.9, 55.4, 39.4, 34.7, 21.7, 13.8. HRMS (ESI) calcd for  $\text{C}_{28}\text{H}_{29}\text{NO}_3$   $[\text{M}+\text{H}]^+$ : 428.2220, Found: 428.2227.

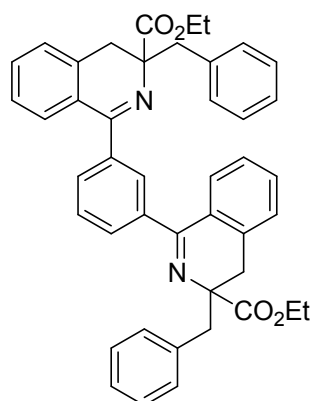

**diethyl 1,1'-(1,3-phenylene)bis(3-benzyl-3,4-dihydroisoquinoline-3-carboxylate) (1u)**

This compound was prepared similarly to **1a**. Colorless oil, 69% yield.  $^1\text{H}$  NMR (500 MHz,  $\text{CDCl}_3$ )  $\delta$  7.92 (dd,  $J = 12.0, 1.0$  Hz, 1H), 7.82-7.78 (m, 2H), 7.56 (dd,  $J = 14.5, 7.5$  Hz, 1H), 7.44-7.40 (m, 2H), 7.36 (d,  $J = 7.5$  Hz, 2H), 7.30-7.19 (m, 14H), 4.07 (dq,  $J = 14.0, 7.0$  Hz, 4H), 3.37-3.26 (m, 4H), 3.11-2.95 (m, 4H), 1.11 (dt,  $J = 10.5, 7.0$  Hz, 6H).  $^{13}\text{C}$  NMR (125 MHz,  $\text{CDCl}_3$ )  $\delta$  173.9, 173.7, 167.2, 167.1, 139.1, 139.0, 137.0, 136.9, 136.9, 131.7, 131.7, 130.9, 130.8, 130.3, 130.2, 128.9, 128.8, 128.7, 128.6, 128.6, 128.4, 128.4, 127.4, 127.1, 67.5, 67.4, 61.6, 61.5, 43.3, 42.6, 33.3, 33.1, 14.4, 14.4; HRMS (APCI) calcd for  $\text{C}_{44}\text{H}_{40}\text{N}_2\text{O}_4$   $[\text{M}+\text{H}]^+$ : 661.3061, Found: 661.3060.

**General procedure for synthesis of six-membered 3,4-dihydroisoquinoline (1v)<sup>2</sup>**

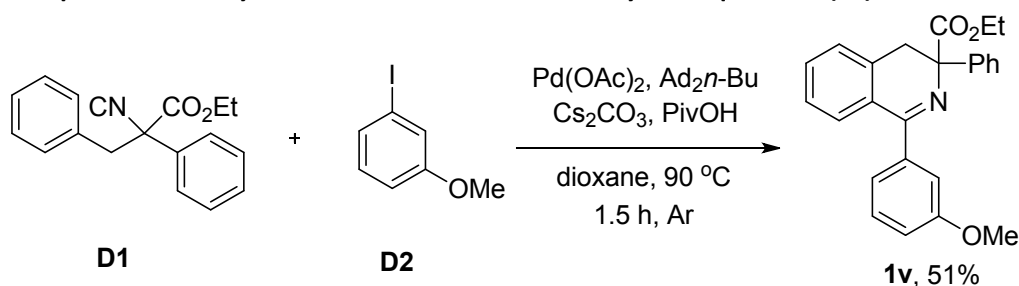

**General procedure for synthesis of six-membered 3,4-dihydroisoquinoline (1v)**

To a mixture of **D2** (0.12 mmol),  $\text{Pd}(\text{OAc})_2$  (2.2 mg, 0.01 mmol, 10 mol %),  $\text{Ad}_2\text{Pn-Bu}$  (7.2 mg, 0.02 mmol, 20 mol %),  $\text{Cs}_2\text{CO}_3$  (39.0 mg, 0.12 mmol) and  $\text{PivOH}$  (6.1 mg, 0.06 mmol) in 1,4-dioxane (1 mL) was added a solution of **D1** (0.1 mmol) in 1,4-dioxane (1 mL) via a syringe pump

during period of 1.5 h (1 mL) in Ar at 90 °C. The solvent was removed under reduced pressure and the residue was purified by silica gel flash Column chromatography to afford the product **1v** as a colorless oil in 51% yield.

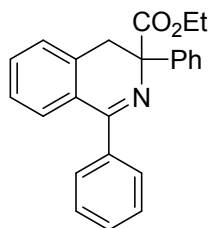

#### ethyl 1,3-diphenyl-3,4-dihydroisoquinoline-3-carboxylate (**1v**)

This compound was prepared similarly to **1a**. Colorless oil. 51% yield.  $^1\text{H}$  NMR (400 MHz,  $\text{CDCl}_3$ )  $\delta$  7.78-7.76 (m, 2H), 7.41-7.25 (m, 10H), 7.08-7.05 (m, 1H), 4.06 (qd,  $J = 7.2, 2.4$  Hz, 2H), 3.90 (s, 3H), 3.79 (d,  $J = 15.6$  Hz, 1H), 3.31 (d,  $J = 15.6$  Hz, 1H), 1.06 (t,  $J = 7.2$  Hz, 3H).  $^{13}\text{C}$  NMR (100 MHz,  $\text{CDCl}_3$ )  $\delta$  172.8, 167.7, 159.5, 141.5, 140.0, 136.7, 131.4, 129.2, 128.7, 128.4, 128.3, 128.2, 127.5, 127.0, 126.7, 122.0, 115.6, 114.7, 67.9, 61.4, 55.5, 35.8, 13.9. HRMS (ESI) calcd for  $\text{C}_{25}\text{H}_{23}\text{NO}_3$   $[\text{M}+\text{H}]^+$ :386.1751, Found: 386.1753.

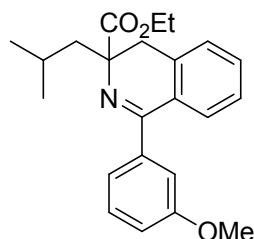

#### ethyl 3-isobutyl-1-(3-methoxyphenyl)-3,4-dihydroisoquinoline-3-carboxylate (**1w**)

This compound was prepared similarly to **1a**. Colorless oil. 91% yield.  $^1\text{H}$  NMR (400 MHz,  $\text{CDCl}_3$ )  $\delta$  7.41-7.34 (m, 2H), 7.30-7.22 (m, 5H), 7.03-7.00 (m, 1H), 4.11 (qd,  $J = 7.2, 1.6$  Hz, 2H), 3.86 (s, 3H), 3.27 (d,  $J = 15.6$  Hz, 1H), 2.96 (d,  $J = 15.6$  Hz, 1H), 2.03-1.79 (m, 3H), 1.16 (t,  $J = 7.2$  Hz, 3H), 1.02 (d,  $J = 6.4$  Hz, 3H), 0.93 (d,  $J = 6.4$  Hz, 3H).  $^{13}\text{C}$  NMR (100 MHz,  $\text{CDCl}_3$ )  $\delta$  174.4, 166.4, 159.4, 140.3, 136.46, 130.9, 129.1, 128.6, 128.1, 128.0, 126.9, 121.8, 115.4, 114.5, 65.8, 60.9, 55.4, 46.2, 35.3, 24.9, 24.1, 23.7, 14.1. HRMS (ESI) calcd for  $\text{C}_{23}\text{H}_{27}\text{NO}_3$   $[\text{M}+\text{H}]^+$ :366.2064, Found: 366.2069.

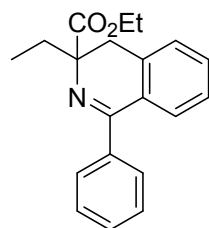

#### ethyl 3-ethyl-1-(3-methoxyphenyl)-3,4-dihydroisoquinoline-3-carboxylate (**1x**)

This compound was prepared similarly to **1a**. Colorless oil. 84% yield.  $^1\text{H}$  NMR (400 MHz,  $\text{CDCl}_3$ )  $\delta$  7.70-7.66 (m, 2H), 7.48-7.43 (m, 3H), 7.41-7.37 (m, 1H), 7.29-7.20 (m, 2H), 4.10 (q,  $J = 7.2$  Hz, 2H), 3.29 (d,  $J = 15.6$  Hz, 1H), 2.98 (d,  $J = 15.6$  Hz, 1H), 2.05-1.97 (m, 2H), 1.14 (t,  $J = 7.2$  Hz, 3H), 1.09 (t,  $J = 7.2$  Hz, 3H).  $^{13}\text{C}$  NMR (100 MHz,  $\text{CDCl}_3$ )  $\delta$  173.8, 167.3, 138.9, 136.5, 131.0, 129.5, 129.2, 128.7, 128.3, 128.2, 128.1, 126.9, 66.3, 60.9, 34.1, 31.3, 14.2, 8.8. HRMS (ESI) calcd for  $\text{C}_{20}\text{H}_{21}\text{NO}_2$   $[\text{M}+\text{H}]^+$ :308.1645, Found: 308.1637.

### III. Synthesis of 1-CF<sub>3</sub>-Dihydroisoquinoline Compounds 4

#### (1) Optimization of the trifluoromethylation of isocyanides

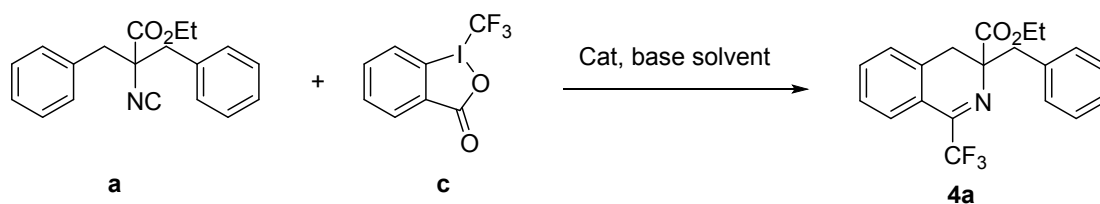

| Entry    | Catalyst    | Ligand                | Base (equiv)                    | solvent        | Yield(%)  |
|----------|-------------|-----------------------|---------------------------------|----------------|-----------|
| 1        | CuCl        | Phenanthroline        | NaOAc                           | MeCN           | 56        |
| 2        | CuCl        | Phenanthroline        | NaOAc                           | DMSO           | 44        |
| 3        | CuCl        | Phenanthroline        | NaOAc                           | THF            | 40        |
| <b>4</b> | <b>CuCl</b> | <b>Phenanthroline</b> | <b>NaOAc</b>                    | <b>Dioxane</b> | <b>60</b> |
| 5        | CuCl        | Phenanthroline        | NaOAc                           | DMF            | 38        |
| 6        | CuCl        | Phenanthroline        | NaOAc                           | MeOH           | trace     |
| 7        | CuCl        | Phenanthroline        | NaOAc                           | DCE            | 35        |
| 8        | CuCl        | Phenanthroline        | NaOAc                           | MTBE           | 34        |
| 9        | CuCl        | Phenanthroline        | C <sub>5</sub> F                | Dioxane        | 52        |
| 10       | CuCl        | Phenanthroline        | K <sub>2</sub> CO <sub>3</sub>  | Dioxane        | 58        |
| 11       | CuCl        | Phenanthroline        | K <sub>2</sub> HPO <sub>4</sub> | Dioxane        | 50        |
| 12       | CuCl        | Phenanthroline        | K <sub>3</sub> PO <sub>4</sub>  | Dioxane        | 60        |
| 13       | CuI         | Phenanthroline        | NaOAc                           | Dioxane        | 48        |
| 14       | CuTc        | Phenanthroline        | NaOAc                           | Dioxane        | 53        |
| 15       | CuCl        |                       | NaOAc                           | Dioxane        | 43        |

**a** (0.1 mmol), **c** (0.15 mmol), catalyst (20 mol%), ligand: 20 mol%, base: 1.0 equiv, solvent: 0.5 mL, 80 °C, Ar.

#### (b) Synthesis and Characterization Data of Compound 4

**ethyl 3-benzyl-1-(trifluoromethyl)-3,4-dihydroisoquinoline-3-carboxylate (4a)**

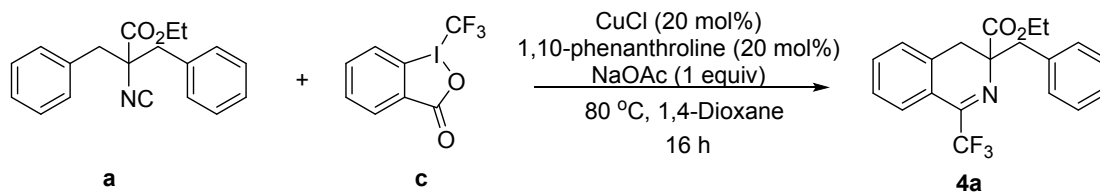

An oven-dried 25 mL Schlenk tube charged with 1-TrifluoroMethyl-1,2-benziodoxol-3(1H)-one (0.15 mmol, 23.7 mg) CuCl (0.02 mmol, 2.0 mg, 20 mol%), 1,10-phenanthroline (0.02 mmol, 20 mol%), NaOAc (0.1 mmol, 8.2 mg, 1 equiv) and **a** (0.1 mmol, 36.9 mg) in 0.5 mL of dioxane was added by syringe and the tube was placed in an 80 °C oil-bath for 16 h. The crude reaction mixture was extracted with EtOAc (20 mL  $\times$  3) and washed with brine (20 mL). The organic phase was concentrated in *vacuo* and the residue was purified by silica gel flash column chromatography to afford the corresponding products.

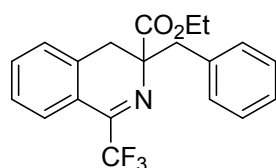

**ethyl 3-benzyl-1-(trifluoromethyl)-3,4-dihydroisoquinoline-3-carboxylate (4a)**

$^1\text{H}$  NMR (500 MHz,  $\text{CDCl}_3$ )  $\delta$  7.60 (d,  $J$  = 8.0 Hz, 1H), 7.45-7.42 (m, 1H), 7.34-7.30 (m, 1H), 7.27-7.19 (m, 6H), 4.14-4.03 (m, 2H), 3.25 (d,  $J$  = 13.5 Hz, 1H), 3.17 (dd,  $J$  = 19.5, 15.0 Hz, 2H), 2.89 (d,  $J$  = 16.5 Hz, 1H), 1.09 (t,  $J$  = 7.0 Hz, 3H).  $^{13}\text{C}$  NMR (125 MHz,  $\text{CDCl}_3$ )  $\delta$  171.9, 155.5 (q,  $J$  = 33.1 Hz), 136.0, 135.5, 132.5, 130.6, 128.6, 128.2, 127.6, 127.0, 125.7 (q,  $J$  = 2.5 Hz), 123.3, 120.0 (q,  $J$  = 277.3 Hz), 66.9, 61.6, 42.5, 32.4, 13.9; HRMS (APCI) calcd for  $\text{C}_{20}\text{H}_{18}\text{F}_3\text{NO}_2$   $[\text{M}+\text{H}]^+$ : 362.1362, Found: 362.1365.

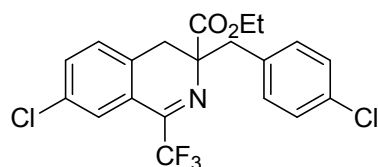

**ethyl 7-chloro-3-(4-chlorobenzyl)-1-(trifluoromethyl)-3,4-dihydroisoquinoline-3-carboxylate (4b)**

This compound was prepared similarly to **4a**. Colorless oil, 48% yield.  $^1\text{H}$  NMR (500 MHz,  $\text{CDCl}_3$ )  $\delta$  7.57 (br s, 1H), 7.42 (dd,  $J$  = 8.0, 2.0 Hz, 1H), 7.25-7.23 (m, 2H), 7.18-7.15 (m, 3H), 4.08-4.01 (m, 2H), 3.20-3.16 (m, 3H), 2.81 (d,  $J$  = 16.5 Hz, 1H), 1.07 (t,  $J$  = 7.0 Hz, 3H).  $^{13}\text{C}$  NMR (125 MHz,  $\text{CDCl}_3$ )  $\delta$  171.6, 155.6 (q,  $J$  = 33.6 Hz), 134.4, 134.1, 133.9, 133.6, 132.9, 132.43, 130.1, 128.7, 126.2 (q,  $J$  = 2.6 Hz), 124.8, 120.1 (q,  $J$  = 274.1 Hz), 67.2, 62.3, 42.8, 32.8, 14.3; HRMS (APCI) calcd for  $\text{C}_{20}\text{H}_{16}\text{Cl}_2\text{F}_3\text{NO}_2$   $[\text{M}+\text{H}]^+$ : 430.0583, Found: 430.0584.

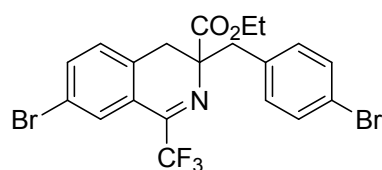

**ethyl 7-bromo-3-(4-bromobenzyl)-1-(trifluoromethyl)-3,4-dihydroisoquinoline-3-carboxylate (4c)**

This compound was prepared similarly to **4a**. Colorless oil, 54% yield.  $^1\text{H}$  NMR (500 MHz,  $\text{CDCl}_3$ )  $\delta$  7.70 (s, 1H), 7.57 (dd,  $J = 8.0, 2.0$  Hz, 1H), 7.38 (d,  $J = 8.5$  Hz, 2H), 7.26 (d,  $J = 0.5$  Hz, 1H), 7.10 (dd,  $J = 8.0, 3.5$  Hz, 3H), 4.08-4.00 (m, 2H), 3.18-3.14 (m, 3H), 2.78 (d,  $J = 16.5$  Hz, 1H), 1.07 (t,  $J = 7.0$  Hz, 3H).  $^{13}\text{C}$  NMR (125 MHz,  $\text{CDCl}_3$ )  $\delta$  171.1, 154.4 (q,  $J = 34.3$  Hz), 135.5, 134.5, 134.3, 132.3, 131.3, 130.0, 128.6 (q,  $J = 2.9$  Hz), 124.7, 121.3, 121.2, 119.7 (q,  $J = 277.0$  Hz), 66.7, 61.9, 42.5, 32.5, 13.9; HRMS (APCI) calcd for  $\text{C}_{20}\text{H}_{16}\text{Br}_2\text{F}_3\text{NO}_2$   $[\text{M}+\text{H}]^+$ : 517.9573, Found: 517.9570.

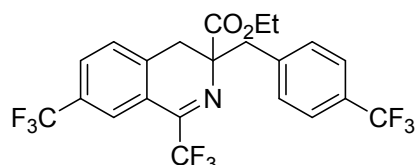

**ethyl 1,7-bis(trifluoromethyl)-3-(4-(trifluoromethyl)benzyl)-3,4-dihydroisoquinoline-3-carboxylate (4d)**

This compound was prepared similarly to **4a**. Colorless oil, 68% yield.  $^1\text{H}$  NMR (500 MHz,  $\text{CDCl}_3$ )  $\delta$  7.79 (s, 1H), 7.70 (d,  $J = 8.0$  Hz, 1H), 7.52 (d,  $J = 8.0$  Hz, 2H), 7.37 (d,  $J = 8.0$  Hz, 3H), 4.08-4.01 (m, 2H), 3.38-3.29 (m, 3H), 2.92 (d,  $J = 16.5$  Hz, 1H), 1.05 (t,  $J = 7.0$  Hz, 3H).  $^{13}\text{C}$  NMR (125 MHz,  $\text{CDCl}_3$ )  $\delta$  170.9, 154.9 (q,  $J = 34.1$  Hz), 139.6, 139.3, 131.1, 130.5 (q,  $J = 33.3$  Hz), 129.6 (q,  $J = 32.1$  Hz), 129.2, 129.1, 125.1 (q,  $J = 3.5$  Hz), 124.1 (q,  $J = 270.5$  Hz), 123.6, 123.4 (q,  $J = 270.9$  Hz), 122.5 (q,  $J = 2.6$  Hz), 119.7 (q,  $J = 276.9$  Hz), 66.5, 62.1, 43.1, 33.2, 13.8; HRMS (APCI) calcd for  $\text{C}_{22}\text{H}_{16}\text{F}_9\text{NO}_2$   $[\text{M}+\text{H}]^+$ : 498.1110, Found: 498.1109.

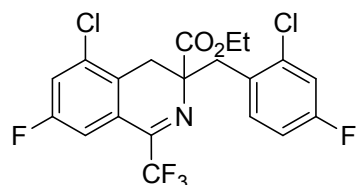

**ethyl 5-chloro-3-(2-chloro-4-fluorobenzyl)-7-fluoro-1-(trifluoromethyl)-3,4-dihydroisoquinoline-3-carboxylate (4e)**

This compound was prepared similarly to **4a**. Colorless oil, 43% yield.  $^1\text{H}$  NMR (500 MHz,  $\text{CDCl}_3$ )  $\delta$  7.39 (dd,  $J = 9.0, 6.0$  Hz, 1H), 7.25 (dd,  $J = 8.0, 2.5$  Hz, 1H), 7.19 (d,  $J = 8.5$  Hz, 1H), 7.06 (dd,  $J = 8.5, 3.0$  Hz, 1H), 6.92-6.88 (m, 1H), 4.12 (q,  $J = 7.0$  Hz, 2H), 3.59 (d,  $J = 14.0$  Hz, 1H), 3.51 (d,  $J = 17.0$  Hz, 1H), 3.45 (d,  $J = 14.0$  Hz, 1H), 2.85 (dd,  $J = 17.0, 1.5$  Hz, 1H), 1.14 (t,  $J = 7.0$  Hz, 3H).  $^{13}\text{C}$  NMR (125 MHz,  $\text{CDCl}_3$ )  $\delta$  170.8, 162.2 (d,  $J = 48.3$  Hz), 160.2 (d,  $J = 248.9$  Hz), 154.6 (d,  $J = 34.0$  Hz), 135.9 (d,  $J = 9.9$  Hz), 134.7 (d,  $J = 9.6$  Hz), 133.7 (d,  $J = 8.5$  Hz), 129.7 (d,  $J = 3.3$  Hz), 129.3 (d,  $J = 3.3$  Hz), 125.2 (d,  $J = 8.1$  Hz), 120.5 (d,  $J = 24.5$  Hz), 119.6 (q,  $J = 275.6$  Hz), 116.7 (d,  $J = 24.4$  Hz), 114 (d,  $J = 20.8$  Hz), 111.6 (d,  $J = 23.8$  Hz), 67.0, 62.2, 39.1, 29.4, 13.9; HRMS (APCI) calcd for  $\text{C}_{20}\text{H}_{14}\text{Cl}_2\text{F}_5\text{NO}_2$   $[\text{M}+\text{H}]^+$ : 466.0395, Found: 466.0392.

## IV. Detailed Optimization and General Procedures of the C-C Bond Cleavage Reactions

Table 1. Detailed Information of Conditions Optimization

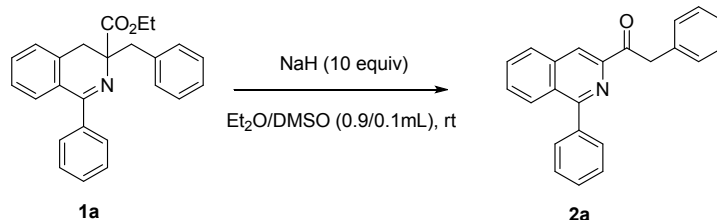

| Entry           | solvent                      | base                            | yield (%) <sup>b</sup> |
|-----------------|------------------------------|---------------------------------|------------------------|
| 1 <sup>c</sup>  | Et <sub>2</sub> O/DMSO (9:1) | NaH                             | 73                     |
| 2 <sup>d</sup>  | Et <sub>2</sub> O/DMSO (9:1) | NaH                             | 73                     |
| 3 <sup>e</sup>  | Et <sub>2</sub> O/DMSO (9:1) | NaH                             | 51                     |
| 4 <sup>f</sup>  | Et <sub>2</sub> O/DMSO (9:1) | NaH                             | 46                     |
| 5 <sup>c</sup>  | Et <sub>2</sub> O/DMSO (9:1) | LiOtBu                          | trace                  |
| 6 <sup>c</sup>  | Et <sub>2</sub> O/DMSO (9:1) | Cs <sub>2</sub> CO <sub>3</sub> | 0                      |
| 7 <sup>c</sup>  | Et <sub>2</sub> O/DMSO (9:1) | K <sub>2</sub> CO <sub>3</sub>  | 0                      |
| 8 <sup>c</sup>  | Et <sub>2</sub> O/DMSO (9:1) | DBU                             | 0                      |
| 9 <sup>c</sup>  | Et <sub>2</sub> O/DMSO (9:1) | DIPEA                           | 0                      |
| 10 <sup>c</sup> | Et <sub>2</sub> O            | NaH                             | 0                      |
| 11 <sup>c</sup> | THF                          | NaH                             | 0                      |
| 12 <sup>c</sup> | toluene                      | NaH                             | 0                      |
| 13 <sup>c</sup> | DMSO                         | NaH                             | 49                     |

<sup>a</sup> Reaction conditions: **1a** (0.1 mmol), 1 mL of solvent, rt, Ar. <sup>b</sup> Isolated yields. <sup>c</sup> Base (10 eq). <sup>d</sup> Base (12 eq). <sup>e</sup> Base (8 eq). <sup>f</sup> Base (6 eq).

### Procedure A:

#### 2-phenyl-1-(1-phenylisoquinolin-3-yl)ethanone (**2a**)

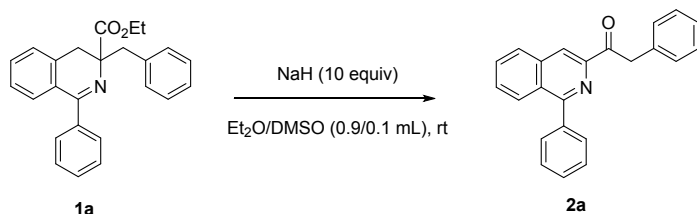

An oven-dried 25 mL Schlenk tube charged with NaH (1 mmol, 40 mg) and ethyl 3-benzyl-1-phenyl-3,4-dihydroisoquinoline-3-carboxylate **1a** (0.1 mmol, 36.9 mg) was vacuumed and refilled with Ar for 3 times. Then a solution of Et<sub>2</sub>O (0.9 mL) and DMSO (0.1 mL) was added in room temperature for 40 min. The crude reaction mixture was quenched with saturated NH<sub>4</sub>Cl. The crude reaction mixture was extracted with EtOAc (20 mL × 3) and washed with brine (20 mL). The

organic phase was concentrated in *vacuo* and the residue was purified by silica gel flash column chromatography to afford the corresponding products.

**Procedure B:**

**ethyl 1-phenylisoquinoline-3-carboxylate (3a)**

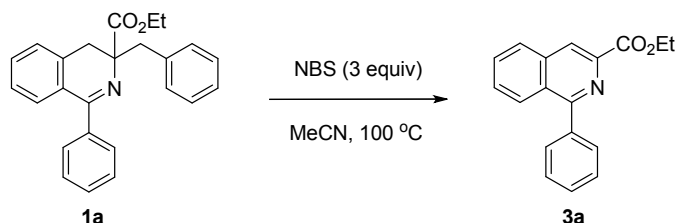

A 25 mL Schlenk tube charged with 3-benzyl-1-phenyl-3,4-dihydroisoquinoline-3-carboxylate **1a** (0.1 mmol, 36.9 mg) and NBS (0.3 mmol, 53.4 mg, 3 equiv) in the solvent of MeCN (1mL) was heated at 100 °C for 12 h. The crude reaction mixture was extracted with EtOAc (20 mL × 3) and washed with brine (20 mL). The organic phase was concentrated in *vacuo* and the residue was purified by silica gel flash column chromatography to afford the corresponding products.

**V. Mechanism of the Formation of Products 2v, 7 and 8**

Sodium methylsulfinylmethylide, which was formed by NaH and DMSO, abstracted one of the cyclic benzylic protons of **1v**, generating the anion intermediate **S-I**. The carbanion underwent an intramolecular electron transfer to promote the C-CO<sub>2</sub>Et bond cleavage. The title product **2v** was yielded with the release of ethoxy anion and carbon monoxide as the by-products.

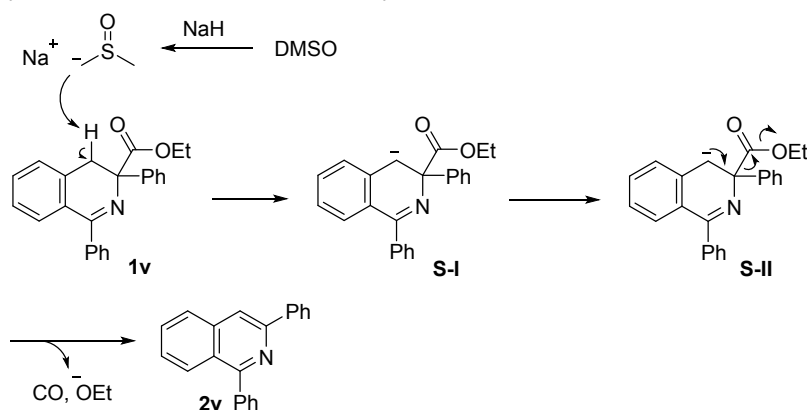

The formed product **2a** was deprotonated to generate an anion intermediate, which underwent a deuteration to deliver the mono deuterated intermediate. Product **7** was generated by repeating the above process. (Dimethyl substituted product **8** was generated with a similar mechanism.)



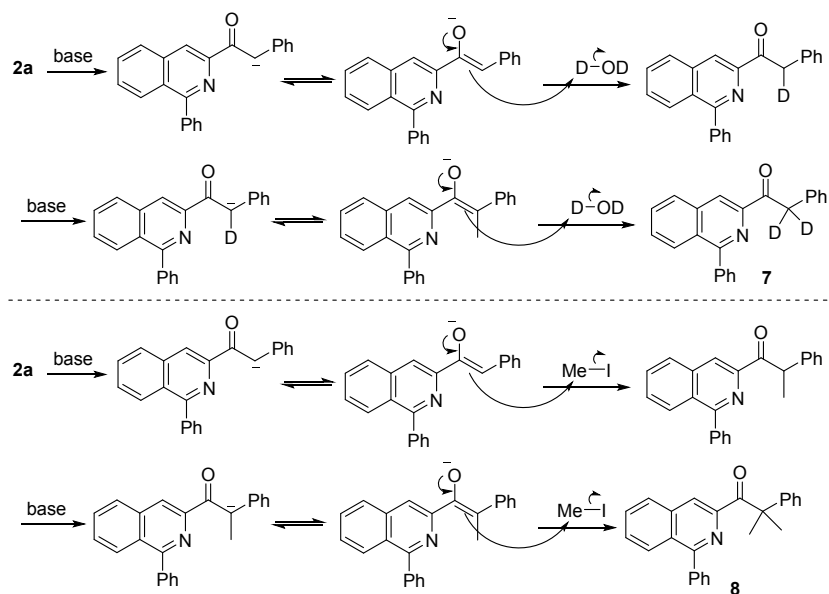

## VI. Characterization Data

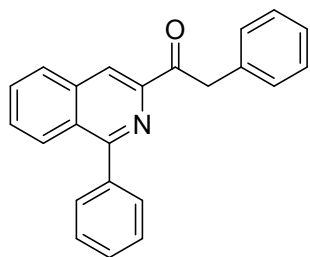

### 2-phenyl-1-(1-phenylisoquinolin-3-yl)ethanone (**2a**)

Prepared from ethyl 3-benzyl-1-phenyl-3,4-dihydroisoquinoline-3-carboxylate **1a** (50 mg, 0.14 mmol, 1.0 equiv) and NaH (54 mg, 1.4 mmol, 10 equiv) according to the general procedure. Column chromatography purification (Petroleum ether : EtOAc 15 : 1) furnished the product **2a** as white solid (23 mg, 0.1 mmol, 73% yield). (new compound). mp: 120-122 °C; <sup>1</sup>H NMR (500 MHz, CDCl<sub>3</sub>) δ 8.48 (d, *J* = 0.5 Hz, 1H), 8.20-8.18 (m, 1H), 8.04 (d, *J* = 8.0 Hz, 1H), 7.79-7.73 (m, 3H), 7.61-7.56 (m, 4H), 7.40-7.39 (m, 2H), 7.33-7.30 (m, 2H), 7.25-7.22 (m, 1H), 4.69 (s, 2H). <sup>13</sup>C NMR (75 MHz, CDCl<sub>3</sub>) δ 199.8, 159.9, 146.2, 139.2, 136.8, 135.3, 130.5, 130.2, 130.1, 129.4, 129.20, 129.0, 128.4, 127.6, 126.6, 120.2, 44.9; HRMS (APCI) calcd for C<sub>23</sub>H<sub>17</sub>NO [M+H]<sup>+</sup>: 354.1489, Found: 354.1381.

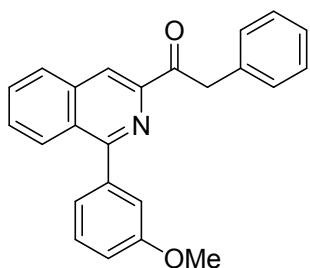

### 1-(1-(3-methoxyphenyl)isoquinolin-3-yl)-2-phenylethanone (**2b**)

Prepared from 1-(1-(3-methoxyphenyl)isoquinolin-3-yl)-2-phenylethanone **1b** (40 mg, 0.1

mmol, 1.0 equiv) and NaH (40 mg, 0.1 mmol, 10 equiv) according to the general procedure. Column chromatography purification (Petroleum ether : EtOAc 15 : 1) furnished the product **2b** as white solid (27 mg, 0.077 mmol, 77% yield). (new compound). mp: 58-60 °C; <sup>1</sup>H NMR (500 MHz, CDCl<sub>3</sub>) δ 8.40 (d, *J* = 0.5 Hz, 1H), 8.12 (dd, *J* = 8.5, 1.0 Hz, 1H), 7.95 (d, *J* = 8.0 Hz, 1H), 7.68-7.64 (m, 1H), 7.59-7.56 (m, 1H), 7.44-7.41 (m, 1H), 7.32-7.30 (m, 2H), 7.27-7.12 (m, 5H), 7.04-7.02 (m, 1H), 4.60 (s, 2H), 3.84 (s, 3H). <sup>13</sup>C NMR (100 MHz, CDCl<sub>3</sub>) δ 199.8, 159.8, 159.7, 146.2, 140.6, 136.8, 135.3, 130.5, 130.1, 129.4, 129.4, 129.2, 128.4, 128.3, 127.6, 126.6, 122.6, 120.2, 115.7, 114.6, 55.5, 44.9; HRMS (APCI) calcd for C<sub>26</sub>H<sub>19</sub>NO<sub>2</sub> [M+H]<sup>+</sup>: 354.1489, Found: 354.1483.

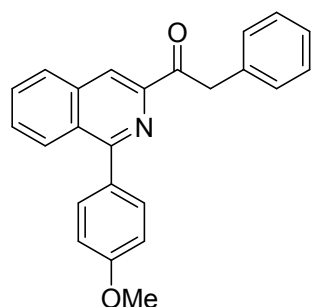

#### 1-(1-(4-methoxyphenyl)isoquinolin-3-yl)-2-phenylethanone (**2c**)

Prepared from ethyl 3-benzyl-1-(4-methoxyphenyl)-3,4-dihydroisoquinoline-3-carboxylate **1c** (25 mg, 0.06 mmol, 1.0 equiv) and NaH (25 mg, 0.6 mmol, 10 equiv) according to the general procedure. Column chromatography purification (Petroleum ether : EtOAc 15 : 1) furnished the product **2c** as white solid (13 mg, 0.035 mmol, 58% yield). (new compound). mp: 136-138 °C; <sup>1</sup>H NMR (500 MHz, CDCl<sub>3</sub>) δ 8.44 (s, 1H), 8.23 (d, *J* = 8.5 Hz, 1H), 8.01 (d, *J* = 8.5 Hz, 1H), 7.75-7.71 (m, 3H), 7.67-7.63 (m, 1H), 7.39 (d, *J* = 7.5 Hz, 2H), 7.32 (t, *J* = 7.5 Hz, 2H), 7.26-7.22 (m, 1H), 7.14-7.12 (m, 2H), 4.69 (s, 2H), 3.94 (s, 3H). <sup>13</sup>C NMR (125 MHz, CDCl<sub>3</sub>) δ 200.3, 160.8, 160.0, 146.6, 137.3, 135.6, 132.1, 132.0, 130.8, 130.4, 129.7, 129.6, 128.8, 128.7, 128.1, 127.0, 120.1, 114.29, 55.9, 45.3; HRMS (APCI) calcd for C<sub>26</sub>H<sub>19</sub>NO<sub>2</sub> [M+H]<sup>+</sup>: 354.1489, Found: 354.1491.

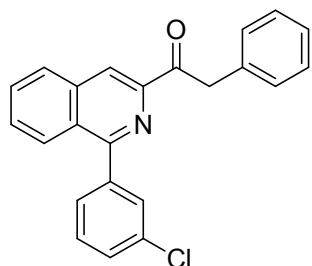

#### 1-(1-(3-chlorophenyl)isoquinolin-3-yl)-2-phenylethanone (**2d**)

Prepared from ethyl 3-benzyl-1-(3-chlorophenyl)-3,4-dihydroisoquinoline-3-carboxylate **1d** (42 mg, 0.1 mmol, 1.0 equiv) and NaH (40 mg, 1 mmol, 10 equiv) according to the general procedure. Column chromatography purification (Petroleum ether : EtOAc 15 : 1) furnished the product **2d** as white solid (23.4 mg, 0.065 mmol, 65% yield). (new compound). mp: 95-97 °C; <sup>1</sup>H NMR (500 MHz, CDCl<sub>3</sub>) δ 8.49 (s, 1H), 8.13 (d, *J* = 8.5 Hz, 1H), 8.05 (d, *J* = 8.0 Hz, 1H), 7.78-7.75 (m, 2H), 7.70-7.67 (m, 1H), 7.65-7.63 (m, 1H), 7.55-7.51 (m, 2H), 7.38 (d, *J* = 7.5 Hz, 2H), 7.32 (t, *J* = 7.5 Hz, 2H), 7.24-7.21 (m, 1H), 4.65 (s, 3H). <sup>13</sup>C NMR (125 MHz, CDCl<sub>3</sub>) δ 199.9, 158.7, 146.6, 141.3, 137.2, 135.6, 134.9, 131.1, 130.7, 130.4, 130.1, 130.0, 129.7, 129.4, 128.8, 128.7, 128.5, 127.5, 127.0, 121.0, 45.5; HRMS (APCI) calcd for C<sub>23</sub>H<sub>16</sub>ClNO [M+H]<sup>+</sup>: 358.0993, Found: 358.0984.

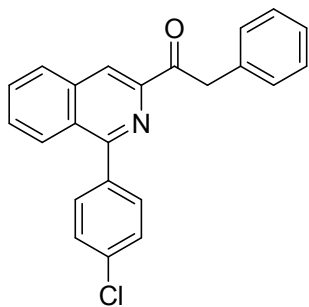

### 1-(1-(4-chlorophenyl)isoquinolin-3-yl)-2-phenylethanone (2e)

Prepared from ethyl 3-benzyl-1-(4-chlorophenyl)-3,4-dihydroisoquinoline-3-carboxylate **1e** (40 mg, 0.1 mmol, 1.0 equiv) and NaH (40 mg, 1 mmol, 10 equiv) according to the general procedure. Column chromatography purification (Petroleum ether : EtOAc 15 : 1) furnished the product **2e** as white solid (28 mg, 0.07 mmol, 72% yield). (new compound). mp: 138-140 °C; <sup>1</sup>H NMR (300 MHz, CDCl<sub>3</sub>) δ 8.49 (s, 1H), 8.14 (d, *J* = 8.4 Hz, 1H), 8.05 (d, *J* = 8.1 Hz, 1H), 7.79-7.65 (m, 4H), 7.59-7.56 (m, 2H), 7.38-7.23 (m, 5H), 4.65 (s, 2H). <sup>13</sup>C NMR (125 MHz, CDCl<sub>3</sub>) δ 199.6, 158.7, 146.2, 137.6, 136.9, 135.2, 131.5, 130.7, 130.0, 129.6, 129.4, 128.7, 128.5, 128.1, 127.2, 126.7, 120.4, 105.0, 45.0; HRMS (APCI) calcd for C<sub>23</sub>H<sub>16</sub>ClNO [M+H]<sup>+</sup>: 358.0993, Found: 358.0987.

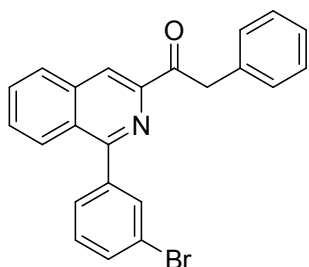

### 1-(1-(3-bromophenyl)isoquinolin-3-yl)-2-phenylethanone (2f)

Prepared from ethyl 3-benzyl-1-(3-bromophenyl)-3,4-dihydroisoquinoline-3-carboxylate **1f** (28 mg, 0.06 mmol, 1.0 equiv) and NaH (25 mg, 0.6 mmol, 10 equiv) according to the general procedure. Column chromatography purification (Petroleum ether : EtOAc 15 : 1) furnished the product **2f** as white solid (18 mg, 0.04 mmol, 65% yield). (new compound). mp: 90-92 °C; <sup>1</sup>H NMR (500 MHz, CDCl<sub>3</sub>) δ 8.50 (s, 1H), 8.12 (d, *J* = 8.5 Hz, 1H), 8.04 (d, *J* = 8.0 Hz, 1H), 7.91 (t, *J* = 2.0 Hz, 1H), 7.75 (t, *J* = 7.5 Hz, 1H), 7.71-7.66 (m, 3H), 7.47 (t, *J* = 8.0 Hz, 1H), 7.40 (d, *J* = 7.5 Hz, 2H), 7.35-7.32 (m, 2H), 7.26-7.23 (m, 1H), 4.65 (s, 2H). <sup>13</sup>C NMR (125 MHz, CDCl<sub>3</sub>) δ 199.9, 158.6, 146.6, 141.6, 137.2, 135.6, 133.5, 132.4, 131.1, 130.4, 130.3, 130.1, 129.7, 129.1, 128.9, 128.5, 127.5, 127.0, 123.0, 121.0, 45.5; HRMS (APCI) calcd for C<sub>23</sub>H<sub>16</sub>BrNO [M+H]<sup>+</sup>: 402.0488, Found: 402.0485.

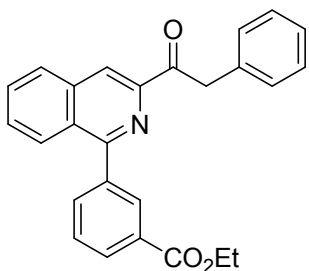

### ethyl 3-(3-(2-phenylacetyl)isoquinolin-1-yl)benzoate (2g)

Prepared from ethyl 3-benzyl-1-(3-(ethoxycarbonyl)phenyl)-3,4-dihydroisoquinoline-3-

carboxylate **1g** (19 mg, 0.04 mmol, 1.0 equiv) and NaH (18 mg, 0.4 mmol, 10 equiv) according to the general procedure. Column chromatography purification (EtOAc : petroleum ether 15 : 1) furnished the product **2g** as white solid (7 mg, 0.016 mmol, 40% yield). (new compound). mp: 88-90 °C; <sup>1</sup>H NMR (500 MHz, CDCl<sub>3</sub>) δ 8.50 (s, 1H), 8.46 (s, 1H), 8.25 (d, *J* = 8.0 Hz, 1H), 8.11 (d, *J* = 8.5 Hz, 1H), 8.05 (d, *J* = 8.0 Hz, 1H), 7.95 (d, *J* = 8.0 Hz, 1H), 7.76 (t, *J* = 7.5 Hz, 1H), 7.68 (t, *J* = 7.5 Hz, 2H), 7.39 (d, *J* = 7.5 Hz, 2H), 7.31 (t, *J* = 7.5 Hz, 2H), 7.22 (t, *J* = 7.5 Hz, 1H), 4.66 (s, 2H), 4.45 (q, *J* = 7.0 Hz, 2H), 1.43 (t, *J* = 7.0 Hz, 3H). <sup>13</sup>C NMR (125 MHz, CDCl<sub>3</sub>) δ 200.0, 166.7, 159.3, 146.6, 139.9, 137.2, 135.5, 134.8, 131.6, 131.3, 131.1, 130.5, 130.4, 130.1, 129.7, 129.0, 128.8, 128.6, 127.6, 127.0, 120.9, 61.6, 45.4, 14.8; HRMS (APCI) calcd for C<sub>26</sub>H<sub>21</sub>NO<sub>3</sub> [M+H]<sup>+</sup>: 396.1594, Found: 396.1593.

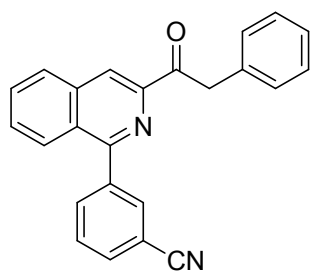

### 3-(3-(2-phenylacetyl)isoquinolin-1-yl)benzonitrile (**2h**)

Prepared from ethyl 3-benzyl-1-(3-cyanophenyl)-3,4-dihydroisoquinoline-3-carboxylate **1h** (27 mg, 0.07 mmol, 1.0 equiv) and NaH (27 mg, 0.7 mmol, 10 equiv) according to the general procedure. Column chromatography purification (Petroleum ether : EtOAc 15 : 1) furnished the product **2h** as white solid (15 mg, 0.046 mmol, 65% yield). (new compound). mp: 130-132 °C; <sup>1</sup>H NMR (500 MHz, CDCl<sub>3</sub>) δ 8.53 (s, 1H), 8.08-7.99 (m, 4H), 7.86-7.84 (m, 1H), 7.81-7.77 (m, 1H), 7.73-7.69 (m, 2H), 7.37-7.30 (m, 4H), 7.25-7.22 (m, 2H), 4.62 (s, 3H). <sup>13</sup>C NMR (125 MHz, CDCl<sub>3</sub>) δ 199.6, 157.6, 146.6, 140.7, 137.2, 135.4, 134.7, 134.1, 132.7, 131.2, 130.4, 130.3, 129.8, 129.6, 128.8, 128.2, 127.0, 126.9, 121.3, 118.9, 113.2, 45.4; HRMS (APCI) calcd for C<sub>24</sub>H<sub>16</sub>N<sub>2</sub>O [M+H]<sup>+</sup>: 349.1335, Found: 349.1334.

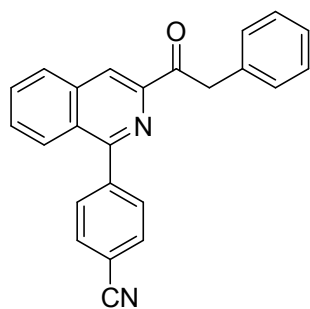

### 4-(3-(2-phenylacetyl)isoquinolin-1-yl)benzonitrile (**2i**)

Prepared from ethyl 3-benzyl-1-(4-cyanophenyl)-3,4-dihydroisoquinoline-3-carboxylate **1i** (37 mg, 0.09 mmol, 1.0 equiv) and NaH (38 mg, 0.9 mmol, 10 equiv) according to the general procedure. Column chromatography purification (Petroleum ether : EtOAc 15 : 1) furnished the product **2i** as white solid (14 mg, 0.039 mmol, 43% yield). (new compound). mp: 153-155 °C; <sup>1</sup>H NMR (500 MHz, CDCl<sub>3</sub>) δ 8.53 (s, 1H), 8.08-8.06 (m, 2H), 7.89-7.87 (m, 4H), 7.79 (t, *J* = 7.5 Hz, 1H), 7.72-7.69 (m, 1H), 7.35-7.29 (m, 4H), 7.23 (t, *J* = 7.0 Hz, 1H), 4.63 (s, 2H). <sup>13</sup>C NMR (125 MHz, CDCl<sub>3</sub>) δ 199.6, 158.1, 146.7, 144.0, 137.3, 135.4, 132.7, 131.3, 130.4, 130.3, 129.9, 128.8, 128.3, 127.1, 127.0, 121.5, 121.4, 119.0, 113.2, 45.3; HRMS (APCI) calcd for C<sub>24</sub>H<sub>16</sub>N<sub>2</sub>O [M+H]<sup>+</sup>: 349.1335,

Found: 349.1333.

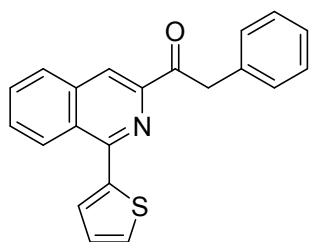

### 2-phenyl-1-(1-(thiophen-2-yl)isoquinolin-3-yl)ethanone (2j)

Prepared from ethyl 3-benzyl-1-(thiophen-2-yl)-3,4-dihydroisoquinoline-3-carboxylate **1j** (28 mg, 0.07 mmol, 1.0 equiv) and NaH (29 mg, 0.7 mmol, 10 equiv) according to the general procedure. Column chromatography purification (Petroleum ether : EtOAc 15 : 1) furnished the product **2j** as white solid (18 mg, 0.05 mmol, 73% yield). (new compound). mp: 82-84 °C; <sup>1</sup>H NMR (500 MHz, CDCl<sub>3</sub>) δ 8.61-8.60 (m, 1H), 8.39 (s, 1H), 8.03-8.01 (m, 1H), 7.77-7.71 (m, 3H), 7.62-7.60 (m, 1H), 7.45-7.43 (m, 2H), 7.32-7.27 (m, 3H), 7.23-7.20 (m, 1H), 4.68 (s, 2H). <sup>13</sup>C NMR (125 MHz, CDCl<sub>3</sub>) δ 199.8, 153.0, 146.3, 143.4, 137.6, 135.5, 131.0, 130.5, 130.5, 129.8, 129.8, 129.0, 128.8, 128.1, 127.9, 127.2, 127.0, 120.3, 45.1; HRMS (APCI) calcd for C<sub>21</sub>H<sub>15</sub>NOS [M+H]<sup>+</sup>: 330.0957, Found: 330.0946.

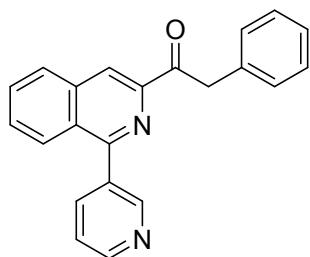

### 2-phenyl-1-(1-(pyridin-3-yl)isoquinolin-3-yl)ethanone (2k)

Prepared from ethyl 3-benzyl-1-(pyridin-3-yl)-3,4-dihydroisoquinoline-3-carboxylate **1k** (19 mg, 0.05 mmol, 1.0 equiv) and NaH (20 mg, 0.5 mmol, 10 equiv) according to the general procedure. Column chromatography purification (Petroleum ether : EtOAc 15 : 1) furnished the product **2k** as white solid (10 mg, 0.04 mmol, 73% yield). (new compound). mp: 90-92 °C; <sup>1</sup>H NMR (500 MHz, CDCl<sub>3</sub>) δ 9.05 (s, 1H), 8.83 (d, *J* = 4.9 Hz, 1H), 8.54 (s, 1H), 8.19 (d, *J* = 7.9 Hz, 1H), 8.13-8.08 (m, 2H), 7.80 (t, *J* = 7.5 Hz, 1H), 7.72 (t, *J* = 7.7 Hz, 1H), 7.64-7.61 (m, 1H), 7.36 (d, *J* = 7.4 Hz, 2H), 7.31 (t, *J* = 7.6 Hz, 2H), 7.23 (t, *J* = 7.2 Hz, 1H), 4.64 (s, 2H). <sup>13</sup>C NMR (125 MHz, CDCl<sub>3</sub>) δ 199.7, 156.7, 150.5, 149.6, 146.8, 138.6, 137.3, 135.7, 135.4, 131.3, 130.4, 130.3, 129.9, 128.8, 128.6, 127.1, 127.0, 124.0, 121.3, 45.3; HRMS (APCI) calcd for C<sub>22</sub>H<sub>16</sub>N<sub>2</sub>O [M+H]<sup>+</sup>: 325.1335, Found: 325.1337.

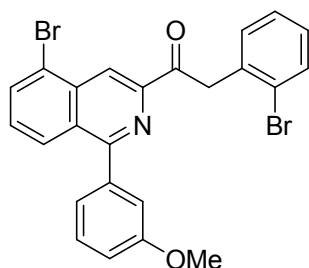

### 1-(5-bromo-1-(3-methoxyphenyl)isoquinolin-3-yl)-2-(2-bromophenyl)ethanone (2l)

Prepared from ethyl 5-bromo-3-(2-bromobenzyl)-1-(3-methoxyphenyl)-3,4-

Dihydroisoquinoline-3-carboxylate **1l** (18 mg, 0.032 mmol, 1.0 equiv) and NaH (13 mg, 0.32 mmol, 10 equiv) according to the general procedure. Column chromatography purification (Petroleum ether : EtOAc 15 : 1) furnished the product **2l** as white solid (12 mg, 0.022 mmol, 70% yield). (new compound). mp: 143-145 °C; <sup>1</sup>H NMR (500 MHz, CDCl<sub>3</sub>) δ 8.85 (s, 1H), 8.19 (d, *J* = 8.5 Hz, 1H), 8.03 (d, *J* = 7.5 Hz, 1H), 7.60 (d, *J* = 8.0 Hz, 1H), 7.52-7.48 (m, 2H), 7.32-7.26 (m, 4H), 7.17-7.10 (m, 2H), 4.87 (s, 2H), 3.91 (s, 3H). <sup>13</sup>C NMR (125 MHz, CDCl<sub>3</sub>) δ 198.4, 160.9, 160.1, 147.6, 140.5, 136.6, 136.2, 134.8, 133.1, 132.4, 130.1, 129.9, 129.8, 128.9, 127.8, 127.8, 125.8, 124.7, 123.1, 119.2, 116.4, 115.1, 55.9, 46.3.; HRMS (APCI) calcd for C<sub>24</sub>H<sub>17</sub>Br<sub>2</sub>NO<sub>2</sub> [M+H]<sup>+</sup>: 509.9699, Found: 509.9691.

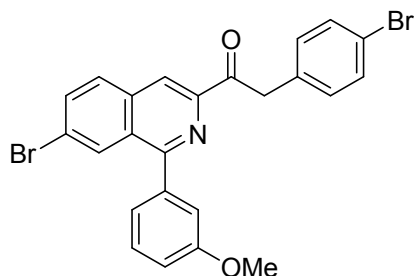

### 1-(7-bromo-1-(3-methoxyphenyl)isoquinolin-3-yl)-2-(4-bromophenyl)ethanone (**2m**)

Prepared from ethyl 7-bromo-3-(4-bromobenzyl)-1-(3-methoxyphenyl)-3,4-dihydroisoquinoline-3-carboxylate **1m** (58 mg, 0.1 mmol, 1.0 equiv) and NaH (40 mg, 1 mmol, 10 equiv) according to the general procedure. Column chromatography purification (Petroleum ether : EtOAc 15 : 1) furnished the product **2m** as white solid (29 mg, 0.05 mmol, 54% yield). (new compound). mp: 178-180 °C; <sup>1</sup>H NMR (500 MHz, CDCl<sub>3</sub>) δ 8.43 (s, 1H), 8.34 (s, 1H), 7.91 (d, *J* = 9.0 Hz, 1H), 7.84-7.82 (m, 1H), 7.54-7.51 (m, 1H), 7.43-7.41 (m, 2H), 7.27-7.25 (m, 4H), 7.14-7.12 (m, 1H), 4.59 (s, 2H), 3.93 (s, 4H). <sup>13</sup>C NMR (125 MHz, CDCl<sub>3</sub>) δ 199.2, 160.2, 159.4, 146.6, 140.2, 135.7, 134.7, 134.4, 132.2, 131.9, 131.1, 130.3, 130.1, 129.6, 124.3, 122.8, 121.1, 120.3, 116.1, 115.2, 105.4, 55.9, 44.7; HRMS (APCI) calcd for C<sub>24</sub>H<sub>17</sub>Br<sub>2</sub>NO<sub>2</sub> [M+H]<sup>+</sup>: 509.9699, Found: 509.9698.

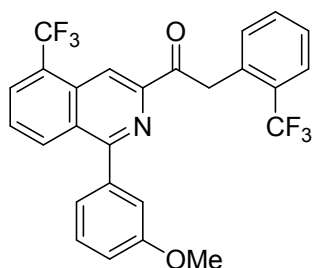

### 1-(1-(3-methoxyphenyl)-5-(trifluoromethyl)isoquinolin-3-yl)-2-(2-(trifluoromethyl)phenyl)ethanone (**2n**)

Prepared from ethyl 1-(3-methoxyphenyl)-5-(trifluoromethyl)-3-(2-(trifluoromethyl)benzyl)-3,4-dihydroisoquinoline-3-carboxylate **1n** (20 mg, 0.04 mmol, 1.0 equiv) and NaH (15 mg, 0.4 mmol, 10 equiv) according to the general procedure. Column chromatography purification (Petroleum ether : EtOAc 15 : 1) furnished the product **2n** as white solid (9.6 mg, 0.02 mmol, 53% yield). (new compound). mp: 170-172 °C; <sup>1</sup>H NMR (500 MHz, CDCl<sub>3</sub>) δ 8.76 (s, 1H), 8.45 (d, *J* = 8.5 Hz, 1H), 8.14 (d, *J* = 7.0 Hz, 1H), 7.73-7.69 (m, 2H), 7.55-7.49 (m, 2H), 7.42-7.37 (m, 2H), 7.32-7.30 (m, 2H), 7.26-7.25 (m, 1H), 7.14-7.12 (m, 1H), 4.93 (s, 2H), 3.92 (s, 3H). <sup>13</sup>C NMR (125 MHz, CDCl<sub>3</sub>) δ 198.1, 161.0, 159.8, 147.0, 140.0, 133.9, 133.2, 133.1, 132.2, 131.7, 129.6, 129.1 (q, *J* = 5.6 Hz),

128.7, 127.6, 127.0, 126.1 (q,  $J = 5.4$  Hz), 126.0 (q,  $J = 272.4$  Hz), 123.8 (q,  $J = 272.0$  Hz), 122.7, 115.9, 115.5, 115.0, 55.5, 42.5; HRMS (APCI) calcd for  $C_{26}H_{17}F_6NO_2$   $[M+H]^+$ : 490.1236, Found: 490.1242.

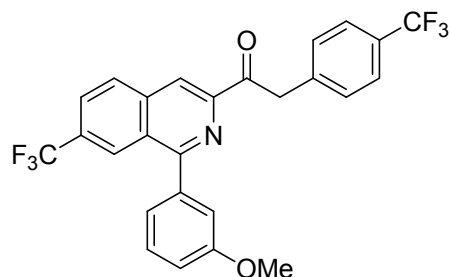

### 1-(1-(3-methoxyphenyl)-

### 7-(trifluoromethyl)isoquinolin-3-yl)-2-(4-(trifluoromethyl)phenyl)ethanone (2o)

Prepared from ethyl 1-(3-methoxyphenyl)-7-(trifluoromethyl)-3-(4-(trifluoromethyl)benzyl)-3,4-dihydroisoquinoline-3-carboxylate **1o** (24 mg, 0.045 mmol, 1.0 equiv) and NaH (18 mg, 0.45 mmol, 10 equiv) according to the general procedure. Column chromatography purification (Petroleum ether : EtOAc 15 : 1) furnished the product **2o** as white solid (15 mg, 0.03 mmol, 67% yield). (new compound). mp: 127-129 °C;  $^1H$  NMR (500 MHz,  $CDCl_3$ )  $\delta$  8.51 (d,  $J = 4.0$  Hz, 2H), 8.18 (d,  $J = 8.5$  Hz, 1H), 7.94-7.92 (m, 1H), 7.58-7.53 (m, 3H), 7.48 (d,  $J = 8.0$  Hz, 2H), 7.28-7.23 (m, 2H), 7.17-7.15 (m, 1H), 4.73 (s, 2H), 3.92 (s, 3H).  $^{13}C$  NMR (125 MHz,  $CDCl_3$ )  $\delta$  198.5, 161.0, 159.9, 147.4, 139.5, 139.0, 138.3, 130.5, 130.4, 129.8, 127.4, 126.4 (q,  $J = 2.6$  Hz), 125.5 (q,  $J = 4.9$  Hz), 125.4 (q,  $J = 3.8$  Hz), 124.7 (q,  $J = 273.5$  Hz), 123.5 (q,  $J = 278.0$  Hz), 122.4, 119.6, 115.8, 115.1, 55.5, 44.8; HRMS (APCI) calcd for  $C_{26}H_{17}F_6NO_2$   $[M+H]^+$ : 490.1236, Found: 490.1244.

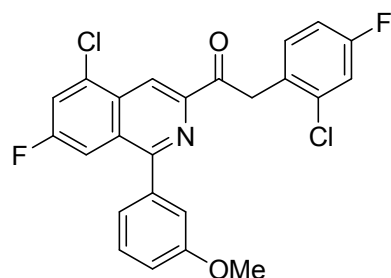

### 2-(2-chloro-4-fluorophenyl)-1-(5-chloro-7-fluoro-1-(3-methoxyphenyl)isoquinolin-3-yl)ethanone (2p)

Prepared from ethyl 5-chloro-3-(2-chloro-4-fluorobenzyl)-7-fluoro-1-(3-methoxyphenyl)-3,4-dihydroisoquinoline-3-carboxylate **1p** (19 mg, 0.04 mmol, 1.0 equiv) and NaH (16 mg, 0.4 mmol, 10 equiv) according to the general procedure. Column chromatography purification (Petroleum ether : EtOAc 15 : 1) furnished the product **2p** as white solid (11 mg, 0.026 mmol, 65% yield). (new compound). mp: 107-109 °C;  $^1H$  NMR (500 MHz,  $CDCl_3$ )  $\delta$  8.84 (d,  $J = 1.0$  Hz, 1H), 7.80-7.77 (m, 1H), 7.68-7.66 (m, 1H), 7.52-7.49 (m, 1H), 7.28-7.26 (m, 3H), 7.18-7.16 (m, 1H), 7.13-7.11 (m, 1H), 6.99-6.95 (m, 1H), 4.79 (s, 2H), 3.91 (s, 3H).  $^{13}C$  NMR (125 MHz,  $CDCl_3$ )  $\delta$  197.6, 161.7 (d,  $J = 247.0$  Hz), 161.1 (d,  $J = 252.5$  Hz), 159.9, 159.8, 146.6 (d,  $J = 2.6$  Hz), 139.6, 135.7 (d,  $J = 10.6$  Hz), 135.4 (d,  $J = 10.5$  Hz), 132.8 (d,  $J = 8.6$  Hz), 132.3, 129.9 (d,  $J = 9.1$  Hz), 129.7, 129.6, 122.3, 121.6 (d,  $J = 28.4$  Hz), 116.8 (d,  $J = 24.6$  Hz), 116.0, 115.8, 114.8, 114.0 (d,  $J = 20.9$  Hz), 110.7 (d,  $J = 22.1$  Hz), 55.5, 42.7; HRMS (APCI) calcd for  $C_{24}H_{15}Cl_2F_2NO_2$   $[M+H]^+$ : 458.0521, Found: 458.0522.

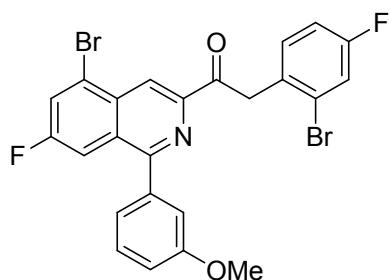

## 2-(2-bromo

### -4-fluorophenyl)-1-(5-bromo-7-fluoro-1-(3-methoxyphenyl)isoquinolin-3-yl)ethanone (2q)

Prepared from ethyl 5-bromo-3-(2-bromo-4-fluorobenzyl)-7-fluoro-1-(3-methoxyphenyl)-3,4-dihydroisoquinoline-3-carboxylate **1q** (32 mg, 0.054 mmol, 1.0 equiv) and NaH (22 mg, 0.54 mmol, 10 equiv) according to the general procedure. Column chromatography purification (Petroleum ether : EtOAc 15 : 1) furnished the product **2q** as white solid (14 mg, 0.035 mmol, 65% yield). (new compound). mp: 139-141 °C; <sup>1</sup>H NMR (500 MHz, CDCl<sub>3</sub>) δ 8.81 (d, *J* = 1.0 Hz, 1H), 7.86-7.82 (m, 2H), 7.53-7.49 (m, 1H), 7.36-7.34(m, 1H), 7.29-7.26 (m, 3H), 7.13-7.11 (m, 1H), 7.04-7.00 (m, 1H), 4.82 (s, 2H), 3.91 (s, 3H). <sup>13</sup>C NMR (125 MHz, CDCl<sub>3</sub>) δ 198.0, 161.8 (d, *J* = 247.6 Hz), 161.5 (d, *J* = 253.4 Hz), 160.4, 160.2, 147.2, 140.0, 133.9, 133.1 (d, *J* = 8.3 Hz), 132.0, 130.4 (d, *J* = 8.5 Hz), 130.1, 125.6 (d, *J* = 27.9 Hz), 122.7, 120.3 (d, *J* = 24.3 Hz), 118.9, 116.3, 115.2, 114.9 (d, *J* = 20.6 Hz), 111.7 (d, *J* = 22.0 Hz), 55.9, 44.5; HRMS (APCI) calcd for C<sub>24</sub>H<sub>15</sub>Br<sub>2</sub>F<sub>2</sub>NO<sub>2</sub> [M+H]<sup>+</sup>: 545.9510, Found: 545.9511.

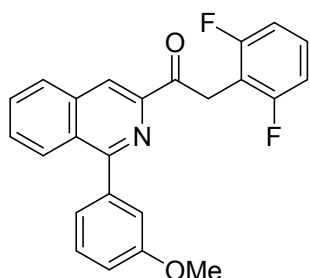

### 2-(2,4-difluorophenyl)-1-(1-(3-methoxyphenyl)isoquinolin-3-yl)ethanone (2r)

Prepared from 2-(2,4-difluorophenyl)-1-(1-(3-methoxyphenyl)isoquinolin-3-yl)ethanone **1r** (45 mg, 0.1 mmol, 1.0 equiv) and NaH (40 mg, 1 mmol, 10 equiv) according to the general procedure. Column chromatography purification (Petroleum ether : EtOAc 15 : 1) furnished the product **2r** as white solid (16 mg, 0.041 mmol, 41% yield). (new compound). mp: 70-72 °C; <sup>1</sup>H NMR (500 MHz, CDCl<sub>3</sub>) δ 8.42 (s, 1H), 8.16 (d, *J* = 8.5 Hz, 1H), 7.99 (d, *J* = 8.0 Hz, 1H), 7.70 (t, *J* = 7.5 Hz, 1H), 7.61 (t, *J* = 7.0 Hz, 1H), 7.42 (t, *J* = 8.0 Hz, 1H), 7.29-7.28 (m, 2H), 7.20-7.14 (m, 1H), 7.04-7.02 (m, 1H), 6.87-6.82 (m, 2H), 4.74 (s, 2H), 3.84 (s, 3H). <sup>13</sup>C NMR (125 MHz, CDCl<sub>3</sub>) δ 196.8, 161.6 (dd, *J* = 245.8, 8.4 Hz), 159.7, 159.5, 145.7, 140.2, 136.5, 130.4, 129.2, 129.1, 129.0, 128.2 (dd, *J* = 20.0, 3.1 Hz), 127.5, 122.4, 119.8, 115.6, 114.3, 111.7 (dd, *J* = 20.9, 20.0 Hz), 110.7 (dd, *J* = 25.6, 14.4 Hz), 55.2, 32.8. HRMS (ESI) calcd for C<sub>24</sub>H<sub>17</sub>F<sub>2</sub>NO<sub>2</sub> [M+H]<sup>+</sup>: 390.1300, Found: 390.1294.



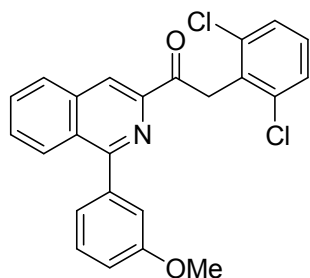

**2-(2,6-dichlorophenyl)-1-(1-(3-methoxyphenyl)isoquinolin-3-yl)ethanone (2s)**

Prepared from ethyl 3-(2,6-dichlorobenzyl)-1-(3-methoxyphenyl)-3,4-dihydroisoquinoline-3-carboxylate **1s** (20 mg, 0.041 mmol, 1.0 equiv) and NaH (17 mg, 0.41 mmol, 10 equiv) according to the general procedure. Column chromatography purification (Petroleum ether : EtOAc 15 : 1) furnished the product **2s** as white solid (6.3 mg, 0.014 mmol, 35% yield). (new compound). mp: 138-140 °C; <sup>1</sup>H NMR (500 MHz, CDCl<sub>3</sub>) δ 8.51 (s, 1H), 8.25 (d, *J* = 8.5 Hz, 1H), 8.07 (d, *J* = 8.0 Hz, 1H), 7.77 (t, *J* = 7.0 Hz, 1H), 7.70-7.67 (m, 1H), 7.52-7.49 (m, 1H), 7.40-7.34 (m, 4H), 7.20-7.17 (m, 1H), 7.12-7.10 (m, 1H), 5.13 (s, 2H), 3.92 (s, 3H). <sup>13</sup>C NMR (125 MHz, CDCl<sub>3</sub>) δ 197.5, 160.3, 160.1, 146.4, 140.9, 137.2, 136.7, 133.6, 130.1, 129.8, 129.7, 128.9, 128.3, 128.1, 123.1, 120.1, 116.4, 114.9, 55.9, 42.2; HRMS (APCI) calcd for C<sub>24</sub>H<sub>17</sub>Cl<sub>2</sub>NO<sub>2</sub> [M+H]<sup>+</sup>: 422.0709, Found: 422.0710.

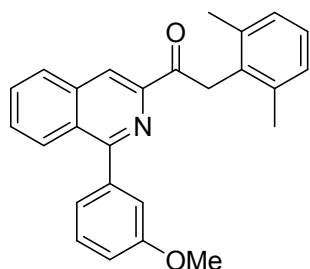

**2-(2,6-dimethylphenyl)-1-(1-(3-methoxyphenyl)isoquinolin-3-yl)ethanone (2t)**

Prepared from ethyl 3-(2,6-dimethylbenzyl)-1-(3-methoxyphenyl)-3,4-dihydroisoquinoline-3-carboxylate **1t** (43 mg, 0.1 mmol, 1.0 equiv) and NaH (40 mg, 1 mmol, 10 equiv) according to the general procedure. Column chromatography purification (Petroleum ether : EtOAc 15 : 1) furnished the product **2t** as Colorless oil (13 mg, 0.034 mmol, 34% yield). (new compound). <sup>1</sup>H NMR (400 MHz, CDCl<sub>3</sub>) δ 8.51 (s, 1H), 8.27 (dd, *J* = 8.5, 0.8 Hz, 1H), 8.09 (d, *J* = 8.2 Hz, 1H), 7.79 (ddd, *J* = 8.2, 6.8, 1.2 Hz, 1H), 7.70 (ddd, *J* = 8.4, 6.8, 1.2 Hz, 1H), 7.54 (t, *J* = 8.0 Hz, 1H), 7.41-7.38 (m, 2H), 7.14-7.08 (m, 4H), 4.83 (s, 2H), 3.94 (s, 3H), 2.29 (s, 6H). <sup>13</sup>C NMR (100 MHz, CDCl<sub>3</sub>) δ 199.7, 159.6, 146.6, 140.5, 137.2, 136.8, 133.5, 130.6, 129.5, 129.4, 129.2, 127.9, 127.7, 126.7, 122.7, 119.6, 115.9, 114.5, 55.5, 39.7, 20.6. HRMS (ESI) calcd for C<sub>26</sub>H<sub>23</sub>NO<sub>2</sub> [M+H]<sup>+</sup>: 382.1802, Found: 382.1796.

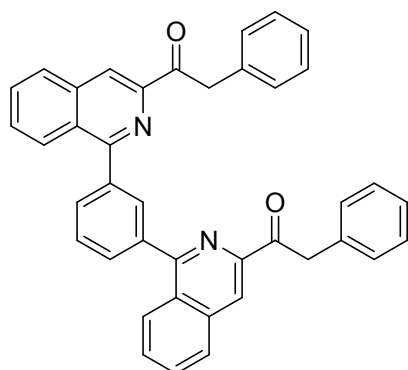

### 1,1'-(1,1'-(1,3-phenylene)bis(isoquinoline-3,1-diyl))bis(2-phenylethanone) (**2u**)

Prepared from diethyl 1,1'-(1,3-phenylene)bis(3-benzyl-3,4-dihydroisoquinoline-3-carboxylate) **1u** (23 mg, 0.035 mmol, 1.0 equiv) and NaH (14 mg, 0.35 mmol, 10 equiv) according to the general procedure. Column chromatography purification (Petroleum ether : EtOAc 15 : 1) furnished the product **2u** as white solid (8 mg, 0.013 mmol, 37% yield). (new compound). mp: 173-175 °C; <sup>1</sup>H NMR (500 MHz, CDCl<sub>3</sub>) δ 8.53 (s, 2H), 8.37 (d, *J* = 8.5 Hz, 2H), 8.20 (t, *J* = 1.5 Hz, 1H), 8.08 (d, *J* = 8.0 Hz, 2H), 8.00-7.99 (m, 2H), 7.84 (t, *J* = 7.5 Hz, 1H), 7.79-7.76 (m, 2H), 7.70-7.74 (m, 2H), 7.36-7.35 (m, 4H), 7.21-7.18 (m, 4H), 7.16-7.13 (m, 2H), 4.70 (s, 4H). <sup>13</sup>C NMR (125 MHz, CDCl<sub>3</sub>) δ 200.0, 159.8, 146.7, 139.8, 137.4, 135.6, 132.7, 131.1, 131.0, 130.4, 130.0, 129.7, 129.0, 128.8, 128.7, 127.9, 127.0, 120.8, 45.3; HRMS (APCI) calcd for C<sub>40</sub>H<sub>28</sub>N<sub>2</sub>O<sub>2</sub> [M+H]<sup>+</sup>: 569.2224, Found: 569.2226.

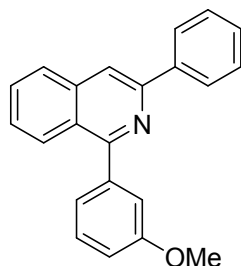

### 1-(3-methoxyphenyl)-3-phenylisoquinoline (**2v**)

Prepared from ethyl 1,3-diphenyl-3,4-dihydroisoquinoline-3-carboxylate **1v** (36 mg, 0.1 mmol, 1.0 equiv) and NaH (40 mg, 1 mmol, 10 equiv) according to the general procedure. Column chromatography purification (Petroleum ether : EtOAc 15 : 1) furnished the product **2v** as colorless oil (11 mg, 0.034 mmol, 34% yield). (new compound). <sup>1</sup>H NMR (400 MHz, CDCl<sub>3</sub>) δ 8.26 - 8.25 (m, 2H), 8.18 (dd, *J* = 8.4, 0.8 Hz, 1H), 8.11 (s, 1H), 7.96 (d, *J* = 8.2 Hz, 1H), 7.73-7.69 (m, 1H), 7.54-7.37 (m, 7H), 7.11-7.06 (m, 1H), 3.93 (s, 3H). <sup>13</sup>C NMR (100 MHz, CDCl<sub>3</sub>) δ 160.2, 159.6, 150.1, 141.2, 139.6, 137.8, 130.1, 129.3, 128.7, 128.5, 127.6, 127.5, 127.1, 127.0, 125.8, 122.7, 115.9, 115.7, 114.4, 55.5. HRMS (ESI) calcd for C<sub>22</sub>H<sub>17</sub>NO [M+H]<sup>+</sup>: 312.1388, Found: 312.1379.

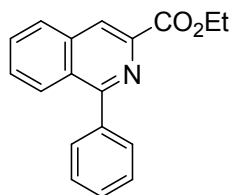

### ethyl 1-phenylisoquinoline-3-carboxylate (**3a**)

Prepared from ethyl 3-benzyl-1-phenyl-3,4-dihydroisoquinoline-3-carboxylate **1a** (37 mg, 0.1 mmol, 1.0 equiv) and NBS (54 mg, 0.3 mmol, 3 equiv) according to the general procedure. Column chromatography purification (Petroleum ether : EtOAc 15 : 1) furnished the product **3a** as white solid (18 mg, 0.066 mmol, 66% yield). (new compound). mp: 90-92 °C; <sup>1</sup>H NMR (300 MHz, CDCl<sub>3</sub>) δ 8.56 (s, 1H), 8.15 (d, *J* = 8.4 Hz, 1H), 8.03 (d, *J* = 8.1 Hz, 1H), 7.80-7.64 (m, 4H), 7.54-7.52 (m, 3H), 4.53 (q, *J* = 7.2 Hz, 2H), 1.47 (t, *J* = 7.2 Hz, 3H). <sup>13</sup>C NMR (75 MHz, CDCl<sub>3</sub>) δ 166.0, 161.2, 141.1, 138.9, 136.6, 130.7, 130.3, 129.4, 128.9, 128.4, 128.4, 128.2, 127.9, 123.1, 61.8, 14.4; HRMS (APCI) calcd for C<sub>18</sub>H<sub>15</sub>NO<sub>2</sub> [M+H]<sup>+</sup>: 278.1176, Found: 278.1182.

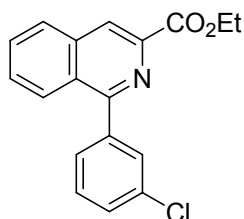

### ethyl 1-(3-chlorophenyl)isoquinoline-3-carboxylate (**3b**)

Prepared from ethyl 3-benzyl-1-(3-chlorophenyl)-3,4-dihydroisoquinoline-3-carboxylate **1d** (35 mg, 0.087 mmol, 1.0 equiv) and NBS (47 mg, 0.26 mmol, 3 equiv) according to the general procedure. Column chromatography purification (Petroleum ether : EtOAc 15 : 1) furnished the product **3b** as white solid (12 mg, 0.055 mmol, 63% yield). (new compound). mp: 110-112 °C; <sup>1</sup>H NMR (500 MHz, CDCl<sub>3</sub>) δ 8.58 (s, 1H), 8.09 (d, *J* = 8.5 Hz, 1H), 8.04 (d, *J* = 8.0 Hz, 1H), 7.79 (t, *J* = 7.5 Hz, 1H), 7.73 (t, *J* = 2.0 Hz, 1H), 7.71-7.68 (m, 1H), 7.61-7.59 (m, 1H), 7.50-7.46 (m, 2H), 4.53 (q, *J* = 7.0 Hz, 2H), 1.47 (t, *J* = 7.0 Hz, 3H). <sup>13</sup>C NMR (126 MHz, CDCl<sub>3</sub>) δ 166.1, 160.0, 141.5, 141.0, 137.0, 134.9, 131.3, 130.7, 130.1, 130.0, 129.5, 129.0, 128.8, 128.4, 127.8, 124.0, 62.3, 14.8.; HRMS (APCI) calcd for C<sub>18</sub>H<sub>14</sub>ClNO<sub>2</sub> [M+H]<sup>+</sup>: 312.0786, Found: 312.0793.

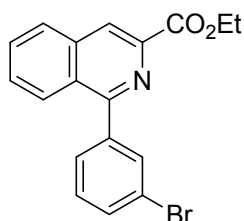

### ethyl 1-(3-bromophenyl)isoquinoline-3-carboxylate (**3c**)

Prepared from ethyl 3-benzyl-1-(3-bromophenyl)-3,4-dihydroisoquinoline-3-carboxylate **1f** (61 mg, 0.14 mmol, 1.0 equiv) and NBS (73 mg, 0.41 mmol, 3 equiv) according to the general procedure. Column chromatography purification (Petroleum ether : EtOAc 15 : 1) furnished the product **3c** as white solid (36 mg, 0.11 mmol, 79% yield). (new compound). mp: 97-99 °C; <sup>1</sup>H NMR (500 MHz, CDCl<sub>3</sub>) δ 8.58 (s, 1H), 8.08 (d, *J* = 8.5 Hz, 1H), 8.04 (d, *J* = 8.0 Hz, 1H), 7.88 (t, *J* = 1.5 Hz, 1H), 7.79 (t, *J* = 7.5 Hz, 1H), 7.69 (t, *J* = 7.5 Hz, 1H), 7.64 (d, *J* = 8.0 Hz, 2H), 7.40 (t, *J* = 8.0 Hz, 1H), 4.53 (q, *J* = 7.0 Hz, 2H), 1.47 (t, *J* = 7.0 Hz, 3H). <sup>13</sup>C NMR (125 MHz, CDCl<sub>3</sub>) δ 166.1, 159.8, 141.5, 141.2, 137.0, 133.5, 132.4, 131.3, 130.3, 130.1, 129.3, 129.0, 128.4, 127.8, 124.0, 123.0, 62.3, 14.8; HRMS (APCI) calcd for C<sub>18</sub>H<sub>14</sub>BrNO<sub>2</sub> [M+H]<sup>+</sup>: 356.0281, Found: 356.0283.

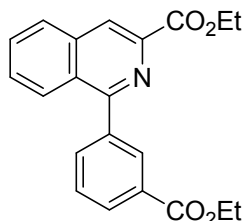

### ethyl 1-(3-(ethoxycarbonyl)phenyl)isoquinoline-3-carboxylate (**3d**)

Prepared from ethyl 3-benzyl-1-(3-(ethoxycarbonyl)phenyl)-3,4-dihydroisoquinoline-3-carboxylate **1g** (52 mg, 0.12 mmol, 1.0 equiv) and NBS (64.1 mg, 0.36 mmol, 3 equiv) according to the general procedure. Column chromatography purification (Petroleum ether : EtOAc 15 : 1) furnished the product **3d** as white solid (22 mg, 0.066 mmol, 55% yield). (new compound). mp: 84-86 °C; <sup>1</sup>H NMR (500 MHz, CDCl<sub>3</sub>) δ 8.59 (s, 1H), 8.39 (t, *J* = 1.5 Hz, 1H), 8.19 (d, *J* = 8.0 Hz, 1H),

8.05 (t,  $J = 7.5$  Hz, 2H), 7.92 (d,  $J = 7.5$  Hz, 1H), 7.79 (t,  $J = 7.5$  Hz, 1H), 7.70-7.67 (m, 1H), 7.62 (t,  $J = 7.5$  Hz, 1H), 4.53 (q,  $J = 7.0$  Hz, 2H), 4.40 (q,  $J = 7.0$  Hz, 2H), 1.47 (t,  $J = 7.0$  Hz, 3H), 1.39 (t,  $J = 7.0$  Hz, 3H).  $^{13}\text{C}$  NMR (125 MHz,  $\text{CDCl}_3$ )  $\delta$  166.7, 166.2, 160.5, 141.6, 139.5, 137.0, 134.9, 131.6, 131.3, 131.1, 130.4, 130.1, 129.0, 128.9, 128.5, 127.9, 123.9, 62.2, 61.5, 14.8, 14.7; HRMS (APCI) calcd for  $\text{C}_{21}\text{H}_{19}\text{NO}_4$   $[\text{M}+\text{H}]^+$ : 350.1387, Found: 350.1386.

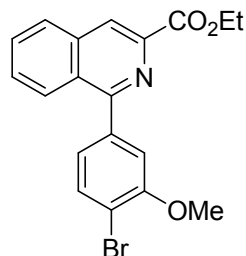

### ethyl 1-(4-bromo-3-methoxyphenyl)isoquinoline-3-carboxylate (**3e**)

Prepared from ethyl 3-benzyl-1-(3-(ethoxycarbonyl)phenyl)-3,4-dihydroisoquinoline-3-carboxylate **1g** (14 mg, 0.03 mmol, 1.0 equiv) and NBS (16 mg, 0.09 mmol, 3 equiv) according to the general procedure. Column chromatography purification (Petroleum ether : EtOAc 15 : 1) furnished the product **3e** as white solid (8 mg, 0.012 mmol, 40% yield). (new compound). mp: 114-116 °C;  $^1\text{H}$  NMR (500 MHz,  $\text{CDCl}_3$ )  $\delta$  8.63 (s, 1H), 8.03 (d,  $J = 8.0$  Hz, 1H), 7.79-7.76 (m, 1H), 7.71-7.69 (m, 1H), 7.66-7.63 (m, 1H), 7.57 (d,  $J = 9.0$  Hz, 1H), 7.02 (d,  $J = 3.0$  Hz, 1H), 6.94-6.91 (m, 1H), 4.57-4.50 (m, 2H), 3.81 (s, 3H), 1.46 (t,  $J = 7.0$  Hz, 3H).  $^{13}\text{C}$  NMR (125 MHz,  $\text{CDCl}_3$ )  $\delta$  166.1, 160.7, 159.4, 141.6, 140.8, 136.4, 133.9, 131.3, 130.0, 129.5, 129.1, 128.8, 128.7, 128.1, 124.4, 117.1, 113.97, 62.2, 56.0, 14.9; HRMS (APCI) calcd for  $\text{C}_{19}\text{H}_{16}\text{BrNO}_3$   $[\text{M}+\text{H}]^+$ : 386.0386, Found: 386.0391.

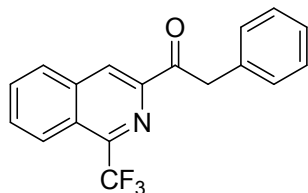

### 2-phenyl-1-(1-(trifluoromethyl)isoquinolin-3-yl)ethanone (**5a**)

Prepared from ethyl 3-benzyl-1-(trifluoromethyl)-3,4-dihydroisoquinoline-3-carboxylate **4a** (28 mg, 0.078 mmol, 1.0 equiv) and NaH (32 mg, 0.78 mmol, 10 equiv) according to the general procedure. Column chromatography purification (Petroleum ether : EtOAc 15 : 1) furnished the product **4e** as white solid (16 mg, 0.051 mmol, 65% yield). (new compound). mp: 76-78 °C;  $^1\text{H}$  NMR (500 MHz,  $\text{CDCl}_3$ )  $\delta$  8.65 (s, 1H), 8.37 (br s, 1H), 8.10-8.08 (m, 1H), 7.86-7.83 (m, 2H), 7.44-7.42 (m, 2H), 7.31 (t,  $J = 7.5$  Hz, 2H), 7.22 (t,  $J = 7.5$  Hz, 1H), 4.64 (s, 2H).  $^{13}\text{C}$  NMR (125 MHz,  $\text{CDCl}_3$ )  $\delta$  198.7, 145.1, 137.7, 134.9, 131.8, 131.4, 130.5, 130.1, 128.9, 127.2, 126.6, 125.2 (q,  $J = 2.8$  Hz), 124.9, 122.3 (q,  $J = 275.5$  Hz), 45.3; HRMS (APCI) calcd for  $\text{C}_{18}\text{H}_{12}\text{F}_3\text{NO}$   $[\text{M}+\text{H}]^+$ : 316.0944, Found: 316.0945.

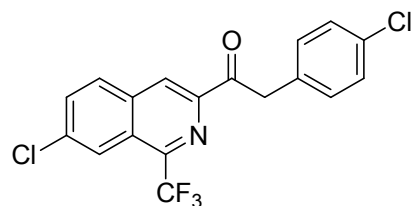

### 1-(7-chloro-1-(trifluoromethyl)isoquinolin-3-yl)-2-(4-chlorophenyl)ethanone (5b)

Prepared from ethyl 7-chloro-3-(4-chlorobenzyl)-1-(trifluoromethyl)-3,4-dihydroisoquinoline-3-carboxylate **4b** (13 mg, 0.03 mmol, 1.0 equiv) and NaH (36 mg, 0.9 mmol, 10 equiv) according to the general procedure. Column chromatography purification (Petroleum ether : EtOAc 15 : 1) furnished the product **4f** as white solid (8 mg, 0.021 mmol, 70% yield). (new compound). mp: 133-135 °C; <sup>1</sup>H NMR (500 MHz, CDCl<sub>3</sub>) δ 8.63 (s, 1H), 8.34 (s, 1H), 8.05 (d, *J* = 9.0 Hz, 1H), 7.81 (dd, *J* = 9.0, 2.0 Hz, 1H), 7.35 (d, *J* = 8.5 Hz, 2H), 7.29-7.27 (m, 2H), 4.58 (s, 2H). <sup>13</sup>C NMR (125 MHz, CDCl<sub>3</sub>) δ 197.8, 145.1, 138.0, 136.8, 136.0, 133.2, 133.1, 131.8, 131.5, 129.1, 127.0, 124.6, 124.4 (q, *J* = 3.0 Hz), 122.9 (q, *J* = 257.4 Hz), 44.6; HRMS (APCI) calcd for C<sub>18</sub>H<sub>10</sub>Cl<sub>2</sub>F<sub>3</sub>NO [M+H]<sup>+</sup>: 384.0164, Found: 384.0166.

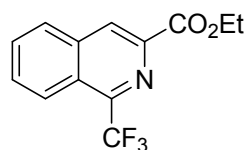

### ethyl 1-(trifluoromethyl)isoquinoline-3-carboxylate (5c)

Prepared from ethyl 3-benzyl-1-(trifluoromethyl)-3,4-dihydroisoquinoline-3-carboxylate **4a** (15 mg, 0.042 mmol, 1.0 equiv) and NBS (23 mg, 0.13 mmol, 3 equiv) according to the general procedure. Column chromatography purification (Petroleum ether : EtOAc 15 : 1) furnished the product **4g** as white solid (7 mg, 0.024 mmol, 57% yield). (new compound). mp: 64-66 °C; <sup>1</sup>H NMR (500 MHz, CDCl<sub>3</sub>) δ 8.75 (s, 1H), 8.39 (d, *J* = 7.5 Hz, 1H), 8.10 (dd, *J* = 7.0, 2.5 Hz, 1H), 7.91-7.85 (m, 2H), 4.55 (q, *J* = 7.0 Hz, 2H), 1.50 (t, *J* = 7.0 Hz, 3H). <sup>13</sup>C NMR (125 MHz, CDCl<sub>3</sub>) δ 164.8, 140.0, 137.1, 131.7, 131.0, 129.0, 127.4, 125.9, 125.0 (q, *J* = 2.8 Hz), 121.8 (q, *J* = 275.1 Hz), 62.2, 14.4; HRMS (APCI) calcd for C<sub>13</sub>H<sub>10</sub>F<sub>3</sub>NO<sub>2</sub> [M+H]<sup>+</sup>: 270.0736, Found: 270.0737.

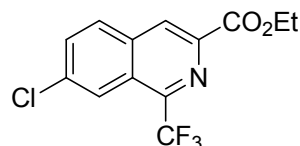

### ethyl 6-chloro-1-(trifluoromethyl)isoquinoline-3-carboxylate (5d)

Prepared from ethyl 7-chloro-3-(4-chlorobenzyl)-1-(trifluoromethyl)-3,4-dihydroisoquinoline-3-carboxylate **4b** (19 mg, 0.044 mmol, 1.0 equiv) and NBS (23.7 mg, 0.13 mmol, 3 equiv) according to the general procedure. Column chromatography purification (Petroleum ether : EtOAc 15 : 1) furnished the product **4h** as white solid (9 mg, 0.029 mmol, 65% yield). (new compound). mp: 90-92 °C; <sup>1</sup>H NMR (500 MHz, CDCl<sub>3</sub>) δ 8.72 (s, 1H), 8.35 (s, 1H), 8.05 (d, *J* = 9.0 Hz, 1H), 7.83 (dd, *J* = 9.0, 2.0 Hz, 1H), 4.54 (q, *J* = 7.0 Hz, 2H), 1.49 (t, *J* = 7.0 Hz, 3H). <sup>13</sup>C NMR (125 MHz, CDCl<sub>3</sub>) δ 164.8, 140.8, 137.7, 135.9, 133.3, 130.8, 127.3, 126.7, 124.6 (q, *J* = 3.0 Hz), 121.9 (q, *J* = 272.5 Hz), 62.7, 14.7; HRMS (APCI) calcd for C<sub>13</sub>H<sub>9</sub>ClF<sub>3</sub>NO<sub>2</sub> [M+H]<sup>+</sup>: 304.0347, Found: 304.0348.

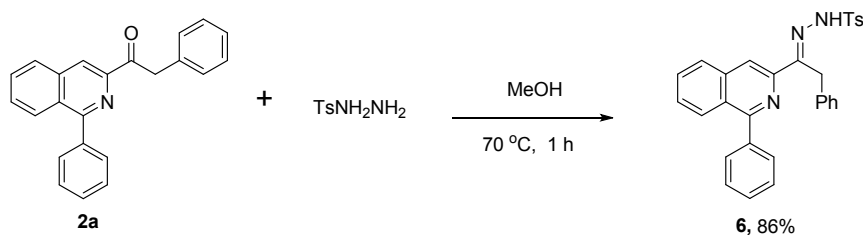

#### 4-methyl-N'-(2-phenyl-1-(1-phenylisoquinolin-3-yl)ethylidene)benzenesulfonylhydrazide (6)

A mixture of **2a** (0.3 mmol) and tosylhydrazide (0.3 mmol) in MeOH (0.5 mL) were heated at 70 °C for 1 h to obtain the corresponding *N*-tosylhydrazone as white precipitate. The organic phase was concentrated in *vacuo* and the residue was purified by silica gel flash column chromatography to afford the corresponding products.

White solid (130 mg, 86% yield). mp: 137-139 °C; <sup>1</sup>H NMR (500 MHz, CDCl<sub>3</sub>) δ 8.40 (s, 0.25H), 8.17 (d, *J* = 8.5 Hz, 1.1H), 8.11 (d, *J* = 8.5 Hz, 0.29H), 7.98 (d, *J* = 8.5 Hz, 0.33H), 7.84-7.82 (m, 3.18H), 7.78 (s, 1.15H), 7.74-7.55 (m, 9.02H), 7.52-7.49 (m, 0.74H), 7.31-7.21 (m, 3.34H), 7.21-7.06 (m, 6.36H), 4.48 (s, 0.49H), 4.13 (s, 2.06H), 2.41 (s, 3H), 2.38 (s, 0.7H). <sup>13</sup>C NMR (125 MHz, CDCl<sub>3</sub>) δ 159.7, 159.4, 145.3, 145.1, 144.4, 143.6, 138.3, 137.9, 137.5, 137.2, 135.7, 135.4, 131.5, 131.1, 130.5, 130.2, 130.1, 129.9, 129.9, 129.6, 129.5, 129.3, 128.9, 128.8, 128.7, 128.3, 128.2, 128.1, 128.0, 127.4, 127.0, 126.9, 126.4, 121.5, 118.1, 42.1, 32.4, 22.0; HRMS (APCI) calcd for C<sub>30</sub>H<sub>25</sub>N<sub>3</sub>O<sub>2</sub>S [M+H]<sup>+</sup>: 492.1740, Found: 492.1746.

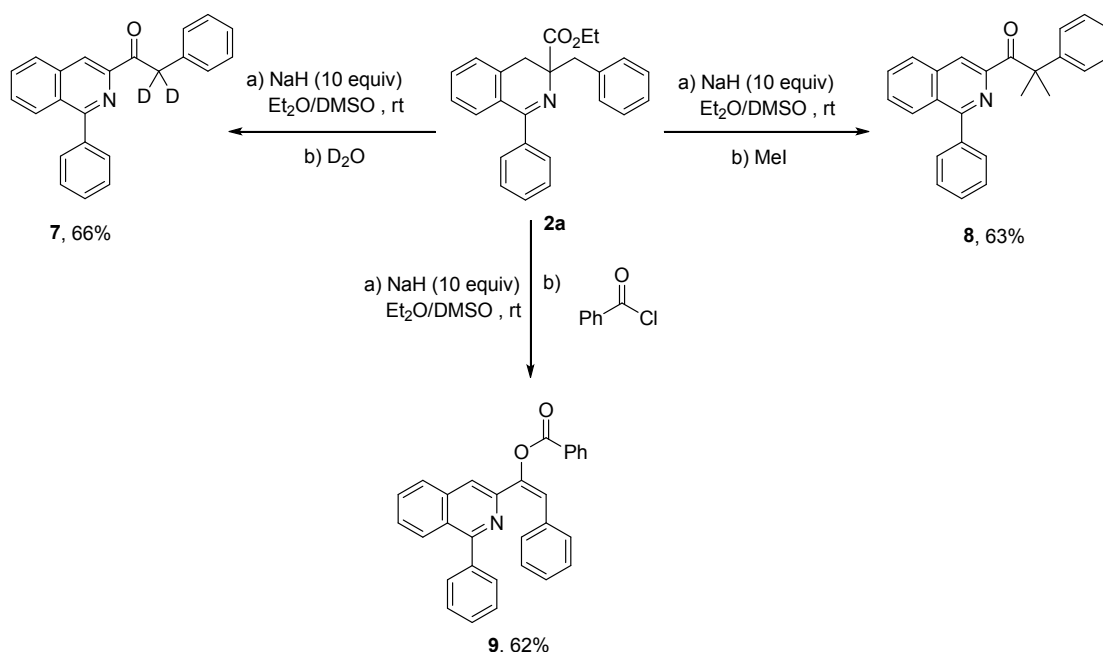

#### Synthesis of Compounds 7-9

a) An oven-dried 25 mL Schlenk tube charged with NaH (1 mmol, 40 mg) and ethyl 3-benzyl-1-phenyl-3,4-dihydroisoquinoline-3-carboxylate (**1a**) (0.1 mmol, 36.9 mg) was vacuumed and refilled with Ar for 3 times. Then a solution of Et<sub>2</sub>O (0.9 mL) and DMSO (0.1 mL) was added in room temperature for 40 min.

b) D<sub>2</sub>O (2 equiv)/MeI (2 equiv)/ benzoyl chloride (2 equiv) was added dropwise with a syringe to the reaction mixture when the reaction was completed. The crude reaction mixture was quenched with saturated NH<sub>4</sub>Cl. The crude reaction mixture was extracted with EtOAc (20 mL × 3) and washed with brine (20 mL). The organic phase was concentrated in *vacuo* and the residue was purified by silica gel flash column chromatography to afford the corresponding products **7**, **8**, and **9**.

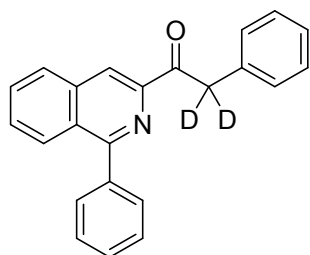

**D<sub>2</sub>-2-phenyl-1-(1-phenylisoquinolin-3-yl)ethanone (7)**

White solid (29 mg, 65% yield). mp: 120-122 °C; <sup>1</sup>H NMR (500 MHz, CDCl<sub>3</sub>) δ 8.48 (s, 1H), 8.19 (d, *J* = 8.5 Hz, 1H), 8.03 (d, *J* = 8.0 Hz, 1H), 7.80-7.78 (m, 2H), 7.76-7.73 (m, 1H), 7.67-7.56 (m, 4H), 7.42-7.40 (m, 2H), 7.33-7.30 (m, 2H), 7.25-7.21 (m, 1H), 4.65 (s, 0.18H). <sup>13</sup>C NMR (125 MHz, CDCl<sub>3</sub>) δ 200.3, 160.3, 146.6, 139.6, 137.2, 135.6, 130.9, 130.6, 130.4, 129.8, 129.6, 129.4, 128.8, 128.8, 128.7, 128.0, 127.0, 120.6, 44.9 (q, *J* = 19.3 Hz); HRMS (APCI) calcd for C<sub>24</sub>H<sub>17</sub>D<sub>2</sub>N<sub>2</sub>O<sub>2</sub> [M+H]<sup>+</sup>: 342.1430, Found: 342.1439.

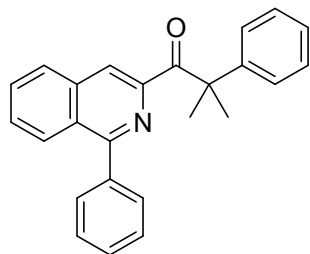

**2-methyl-2-phenyl-1-(1-phenylisoquinolin-3-yl)propan-1-one (8)**

White solid (30 mg, 66% yield). <sup>1</sup>H NMR (500 MHz, CDCl<sub>3</sub>) δ 8.43 (s, 1H), 8.08 (d, *J* = 8.5 Hz, 1H), 7.98 (d, *J* = 8.0 Hz, 1H), 7.68 (t, *J* = 7.5 Hz, 1H), 7.58 (t, *J* = 7.5 Hz, 1H), 7.46-7.41 (m, 3H), 7.29-7.17 (m, 7H), 1.78 (s, 6H). <sup>13</sup>C NMR (125 MHz, CDCl<sub>3</sub>) δ 202.7, 157.2, 145.6, 144.9, 137.6, 135.8, 129.3, 129.1, 128.1, 128.0, 127.5, 127.1, 126.9, 126.3, 126.2, 125.1, 124.6, 120.7, 50.4, 26.4. HRMS (ESI) calcd for C<sub>25</sub>H<sub>21</sub>NO [M+H]<sup>+</sup>: 352.1696, Found: 352.1698.

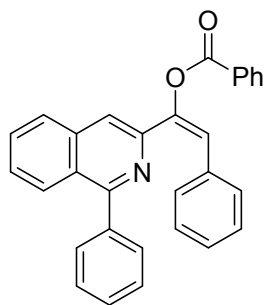

**2-phenyl-1-(1-phenylisoquinolin-3-yl)vinyl benzoate (9)**

White solid (53 mg, 62% yield). mp: 155-157 °C; <sup>1</sup>H NMR (500 MHz, CDCl<sub>3</sub>) δ 8.36-8.35 (m, 2H), 8.09 (d, *J* = 8.5 Hz, 1H), 7.93 (s, 1H), 7.81-7.78 (m, 3H), 7.75-7.72 (m, 1H), 7.69-7.84 (m, 4H), 7.62-7.49 (m, 6H), 7.30-7.21 (m, 3H). <sup>13</sup>C NMR (125 MHz, CDCl<sub>3</sub>) δ 164.8, 160.9, 145.6, 145.3, 137.9, 134.6, 134.3, 130.9, 130.7, 129.7, 129.3, 128.0, 129.68, 128.3, 128.2, 128.1, 127.8, 126.7, 120.0, 115.0, 105.4; HRMS (APCI) calcd for C<sub>30</sub>H<sub>21</sub>NO<sub>2</sub> [M+H]<sup>+</sup>: 428.1645, Found: 428.1647.

## VII. References

- (1) Wang, J.; Gao, D.; Huang, J.; Tang, S.; Xiong, Z.; Hu, H.; You, S.; Zhu, Q. Palladium-Catalyzed Enantioselective C(sp<sup>2</sup>)-H Imidoylation by Desymmetrization. *ACS Catal.*, **2017**, *7* (6), pp 3832–3836.
- (2) Tang, S.; Yang, S.; Sun, H.; Zhou, Y.; Li, J. and Zhu, Q. Pd-Catalyzed Divergent C(sp<sup>2</sup>)-H Activation/Cycloimidoylation of 2-Isocyano-2,3-diarylpropanoates. *Org. Lett.* **2018**, *20*, 1832–1836



## VIII. Copies of $^1\text{H}$ and $^{13}\text{C}$ NMR Spectra

C1

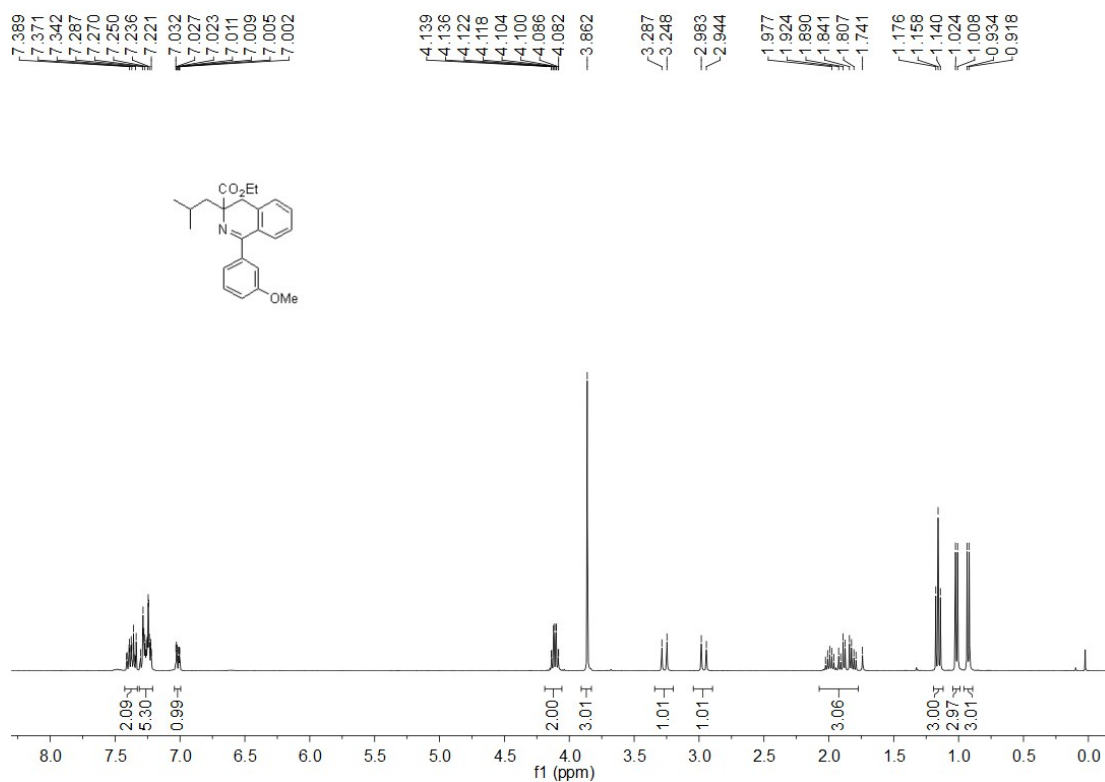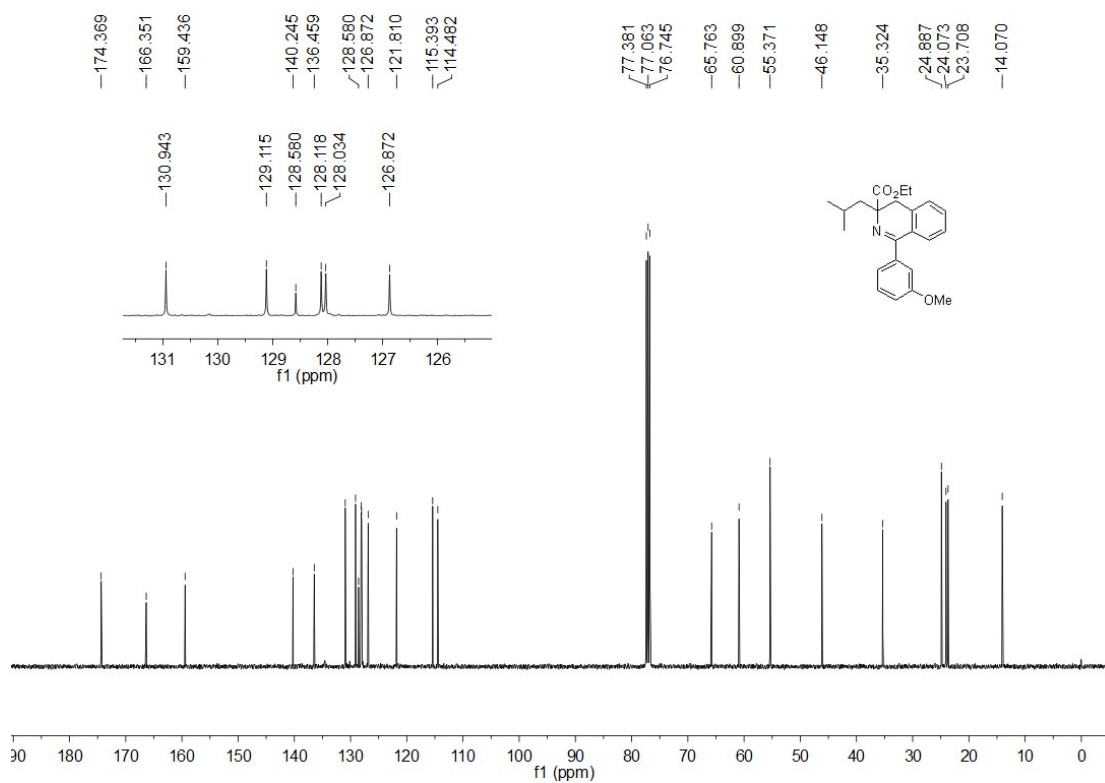

C2

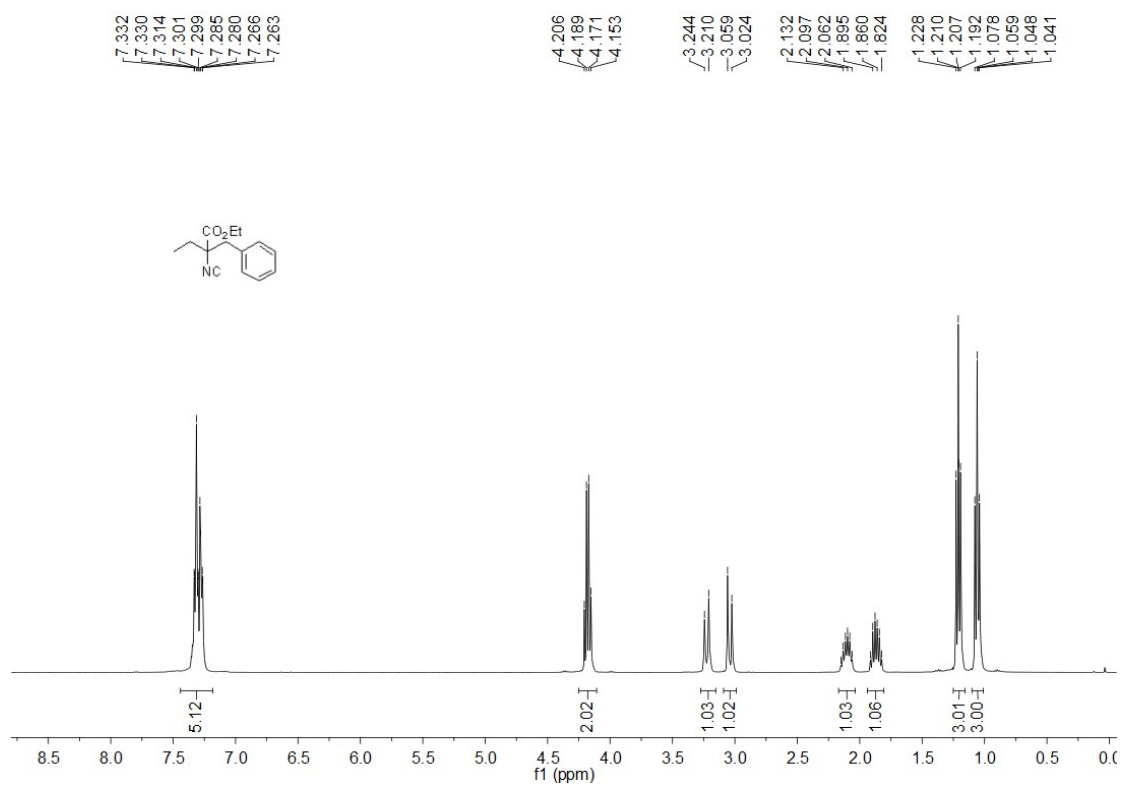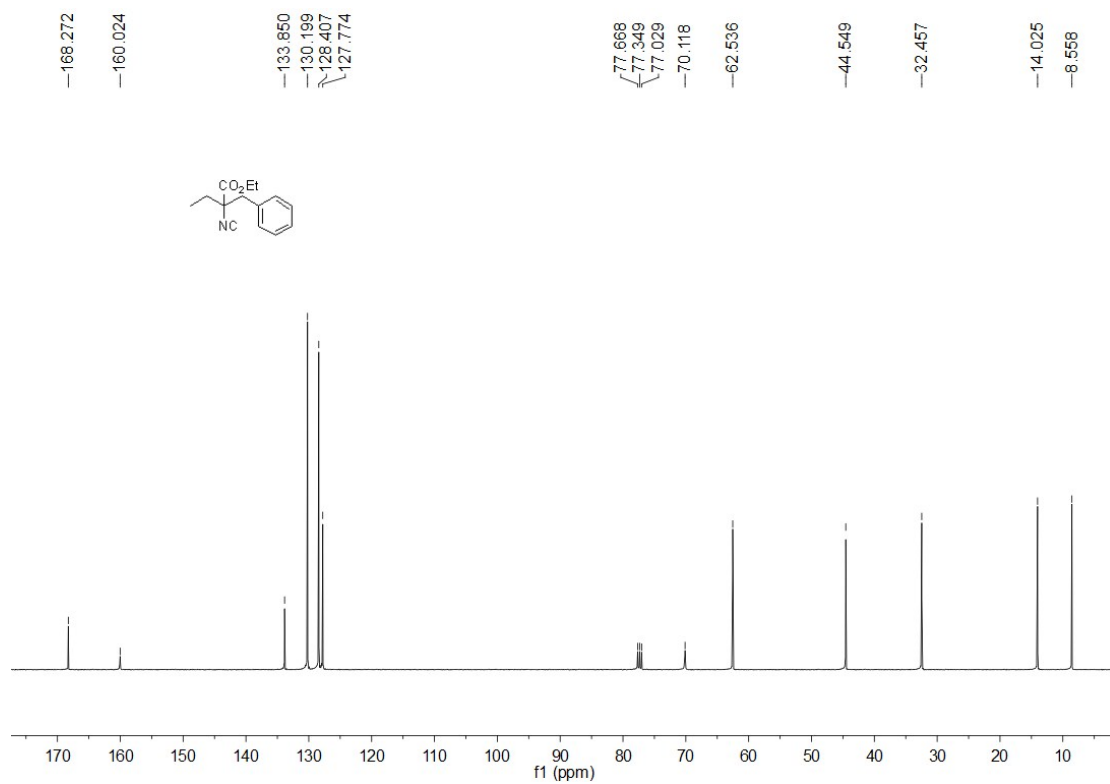

C3

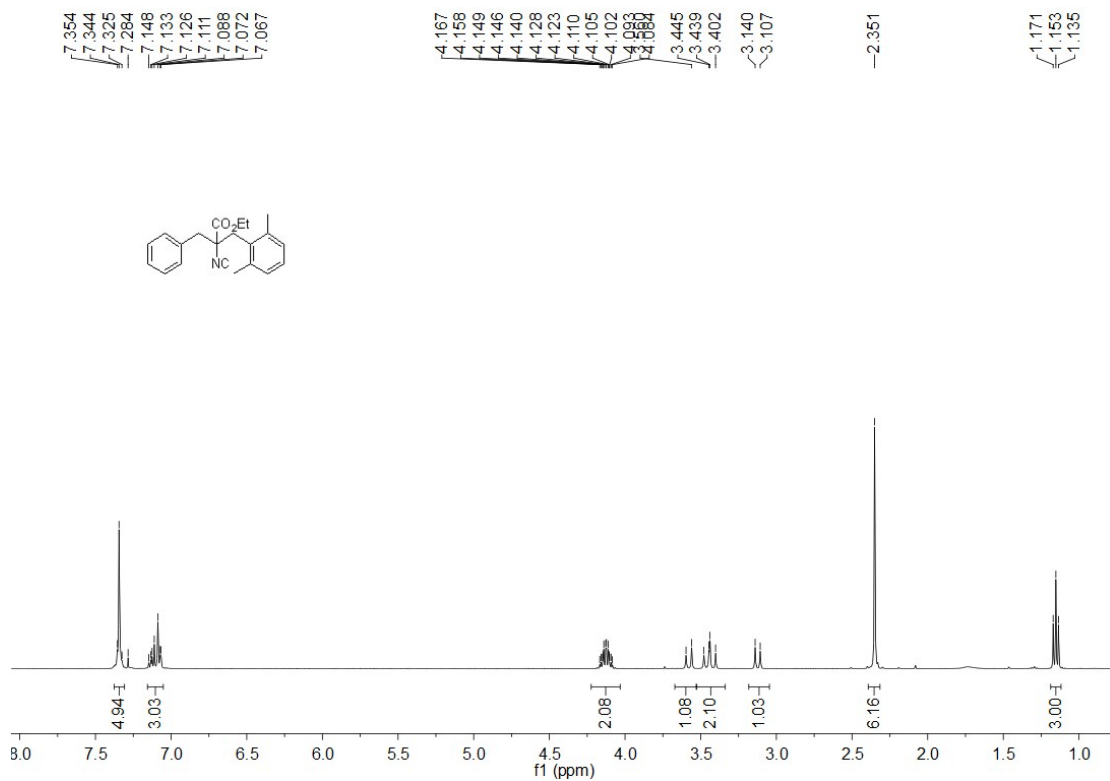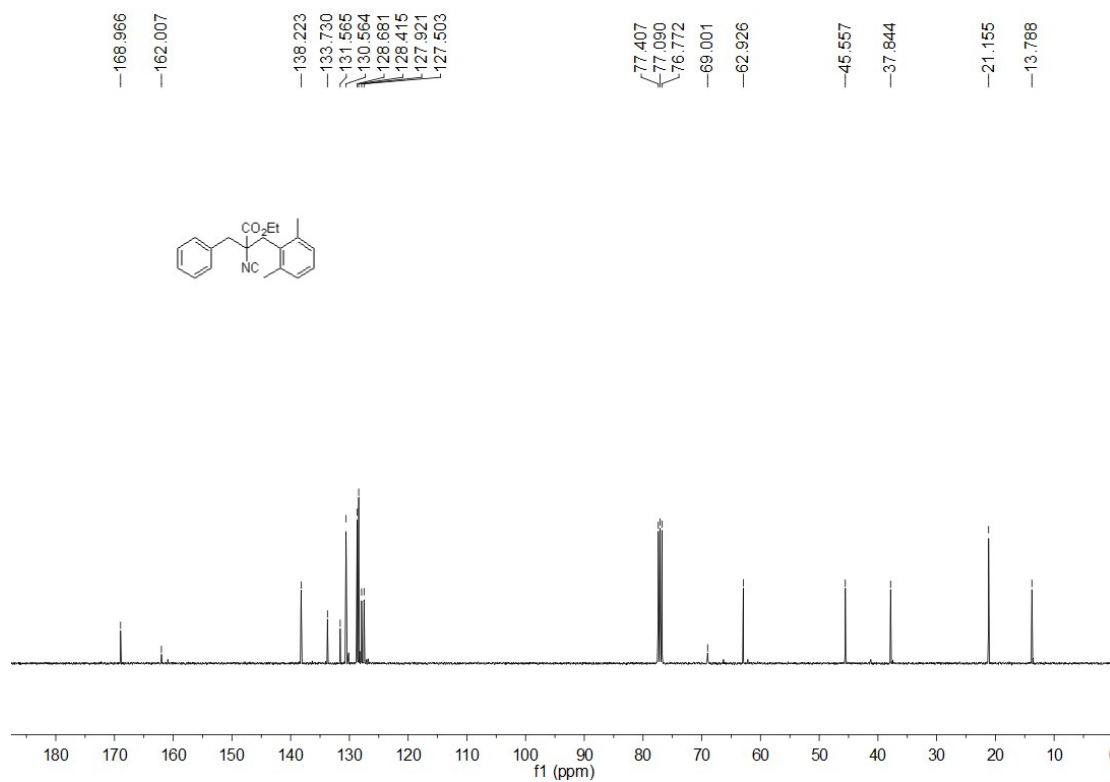

1a

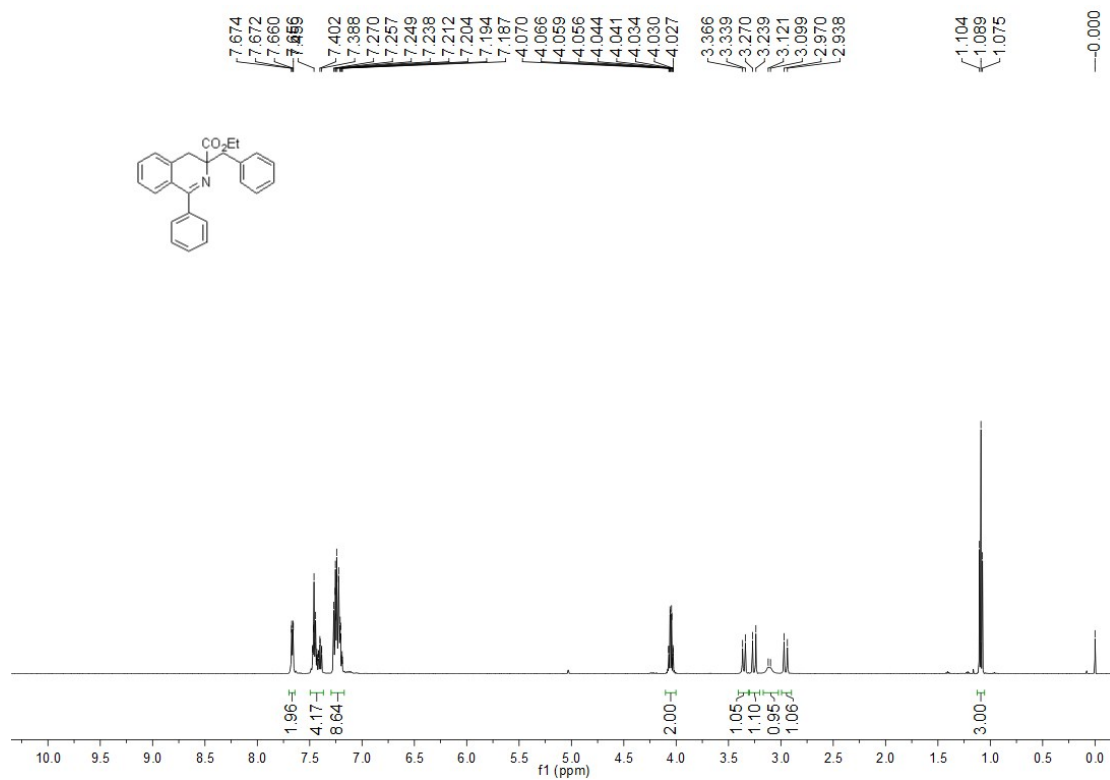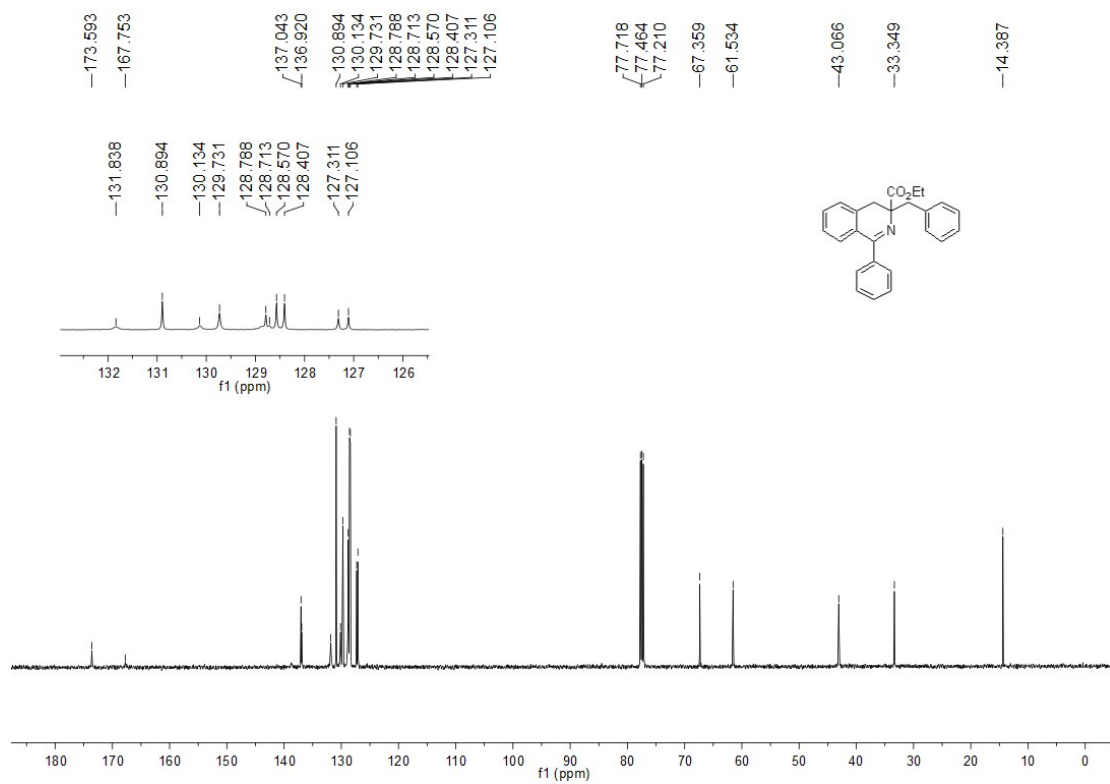

1b

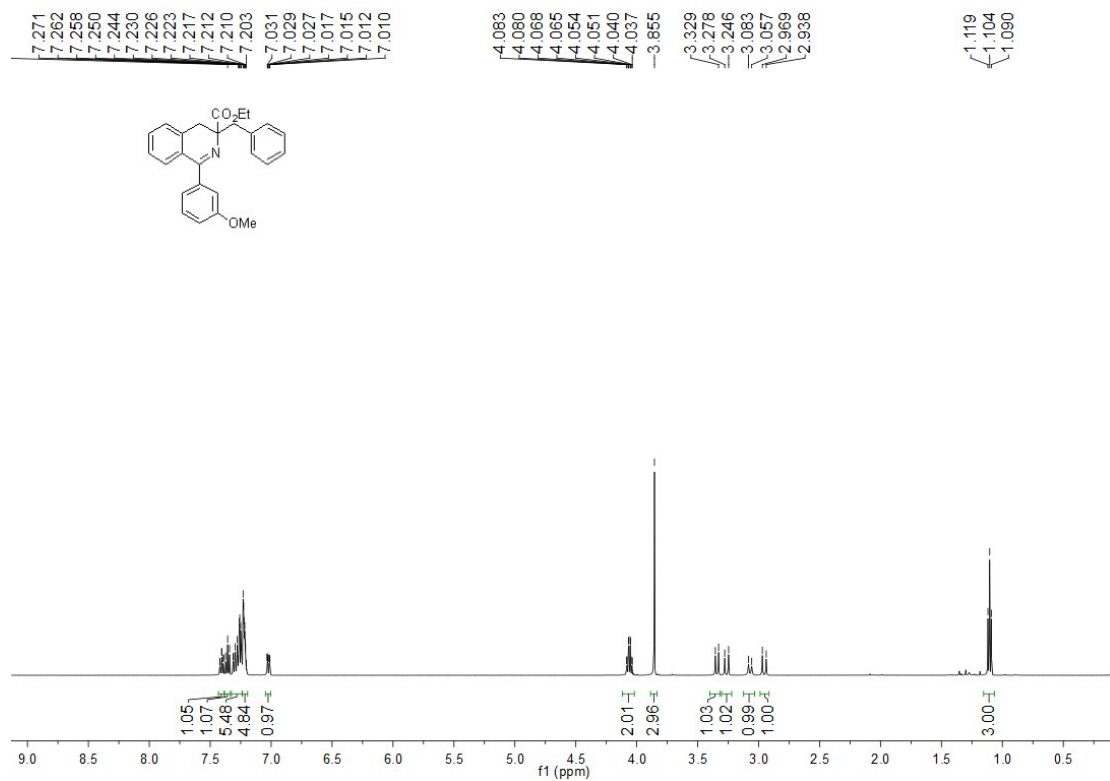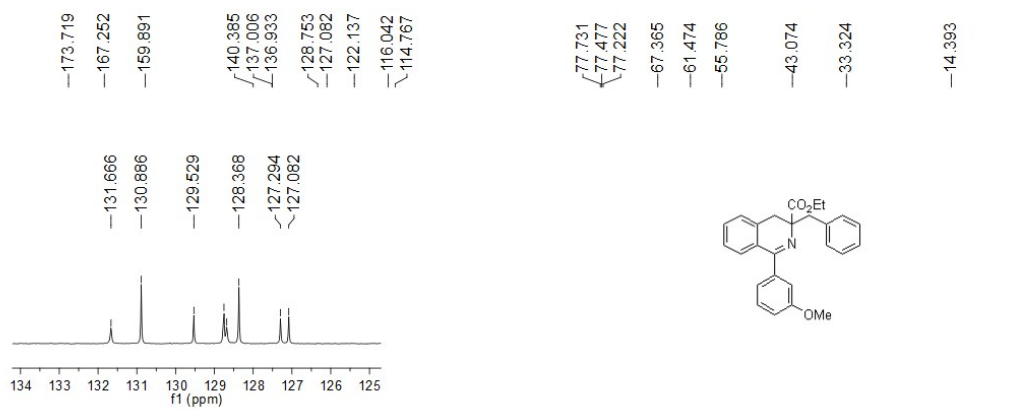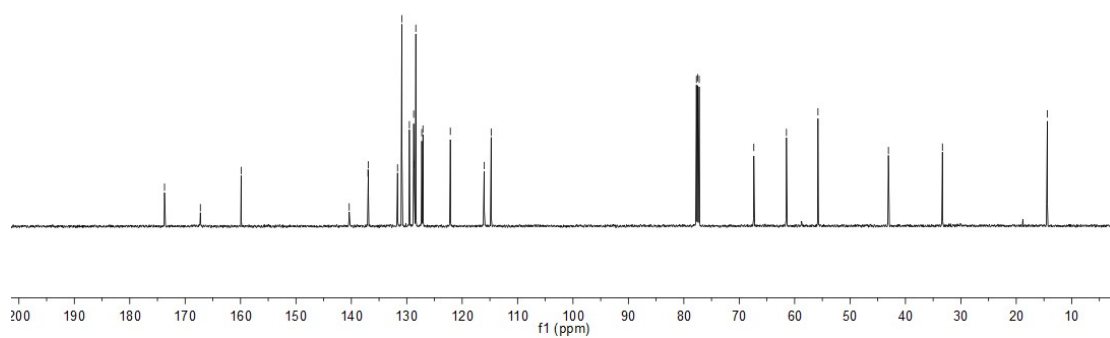

1c

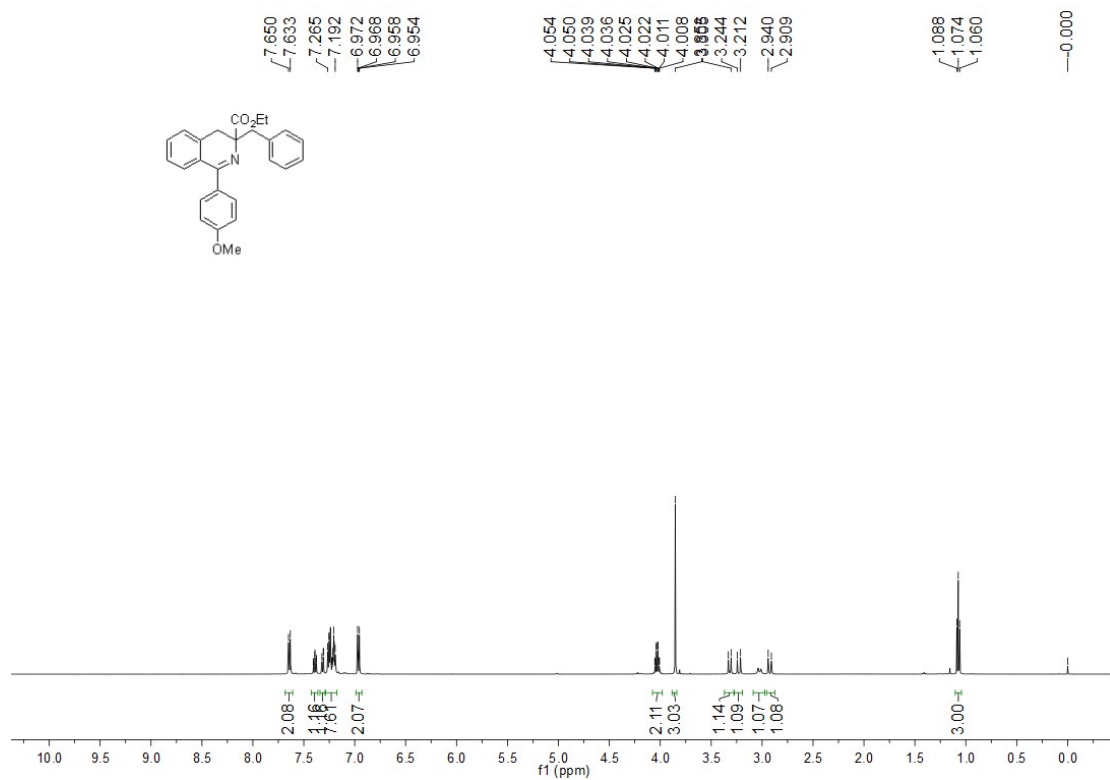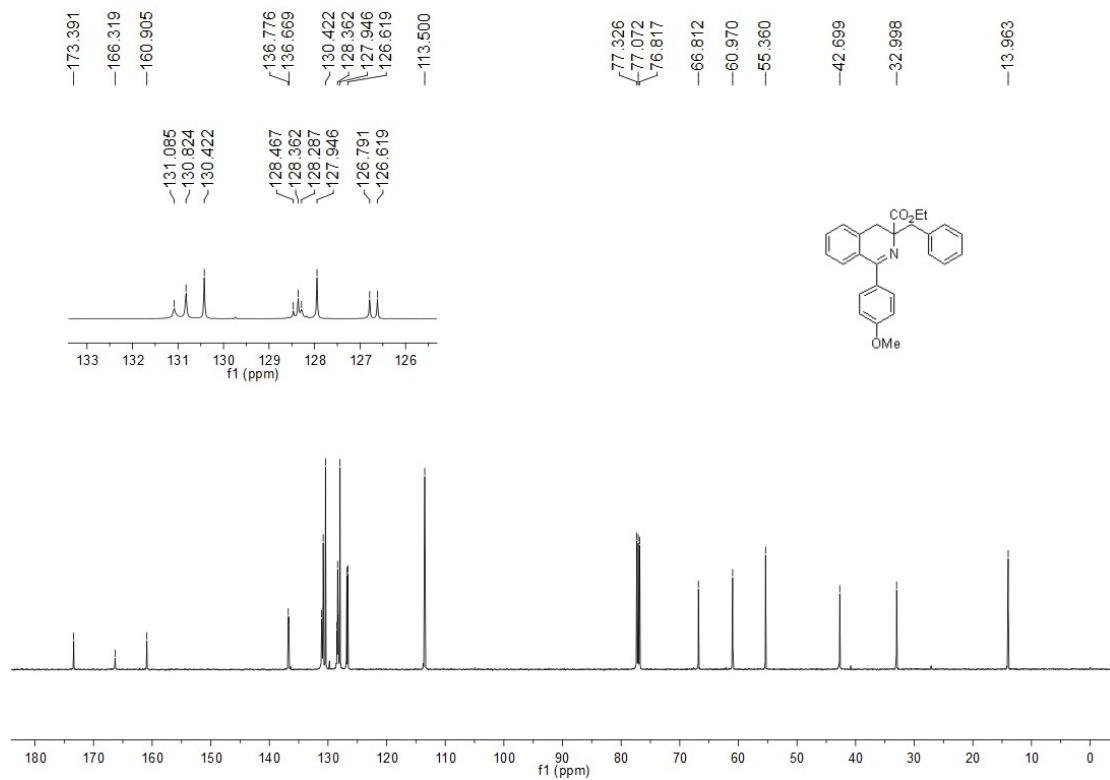

**1d**

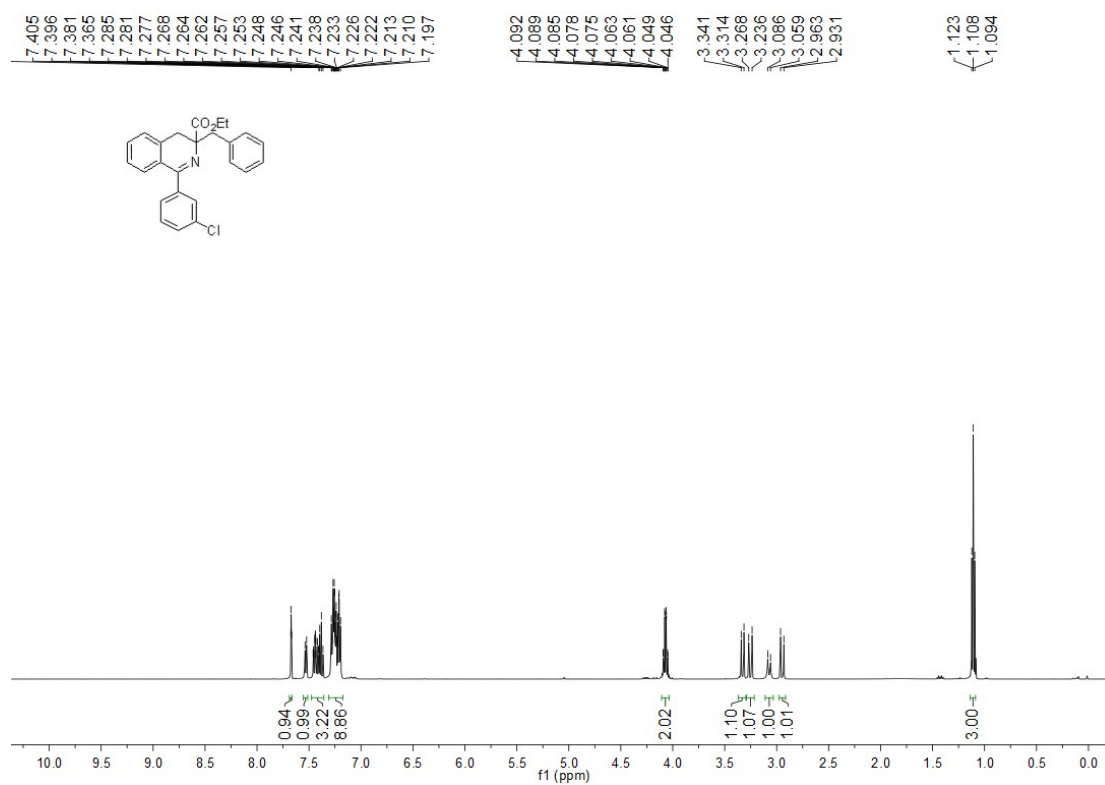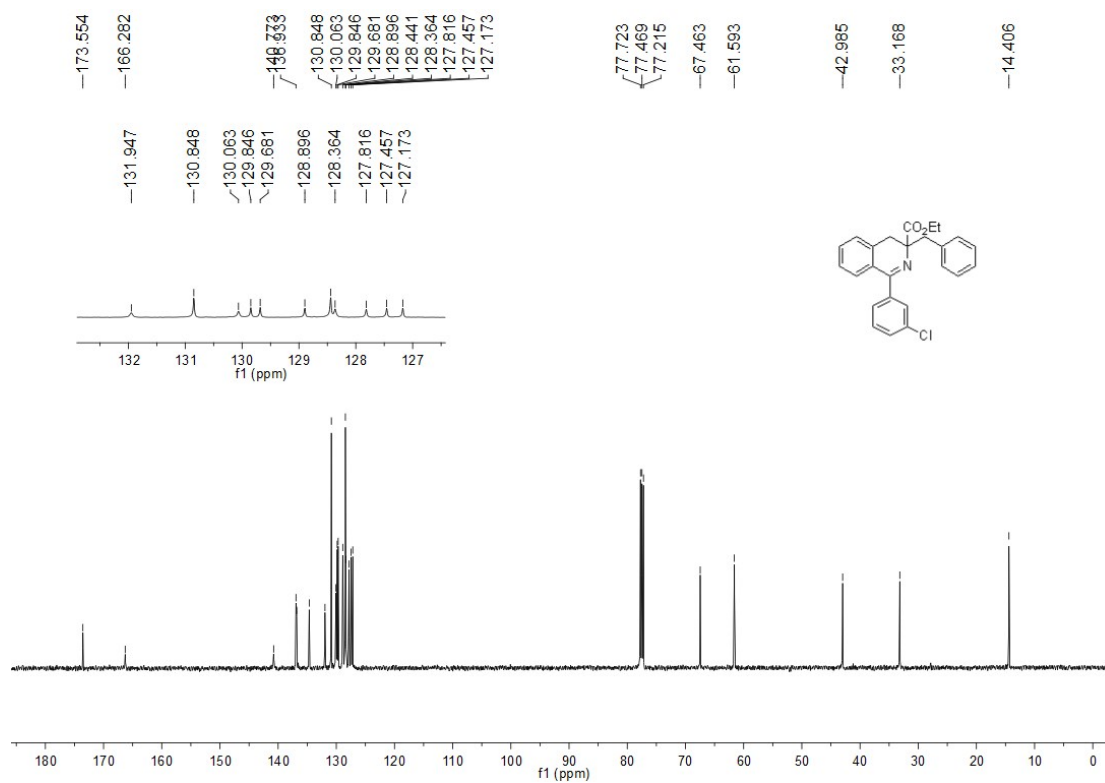

1e

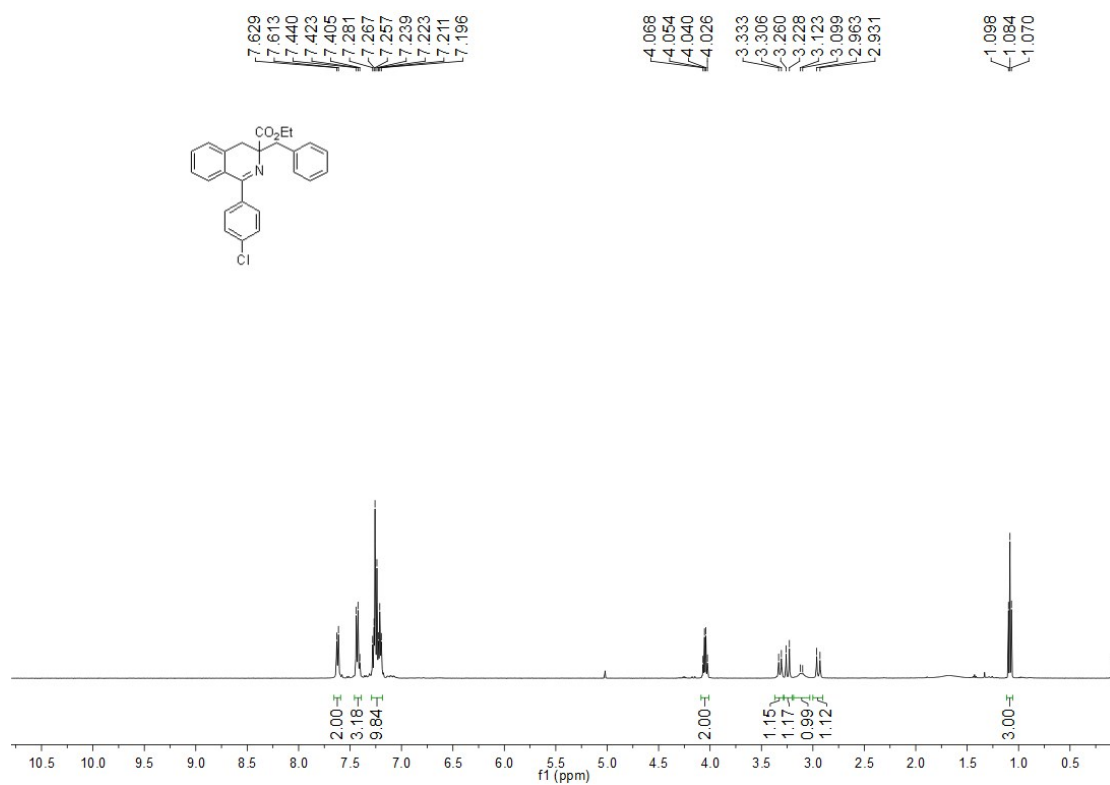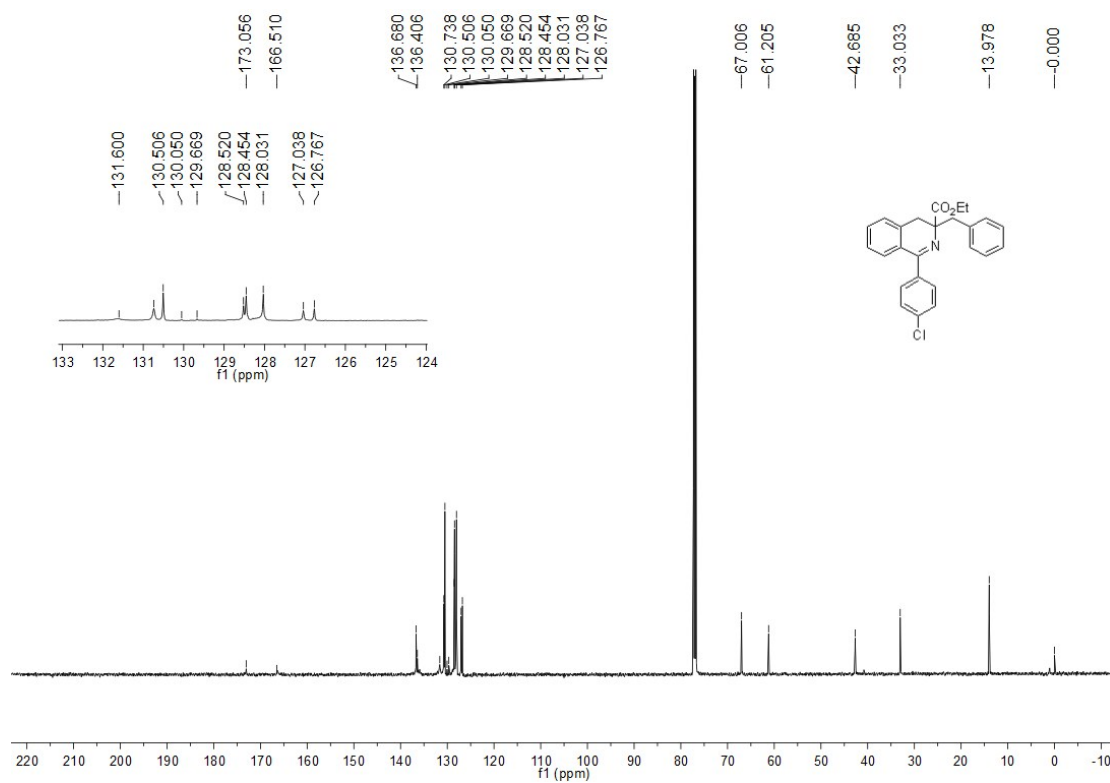



1f

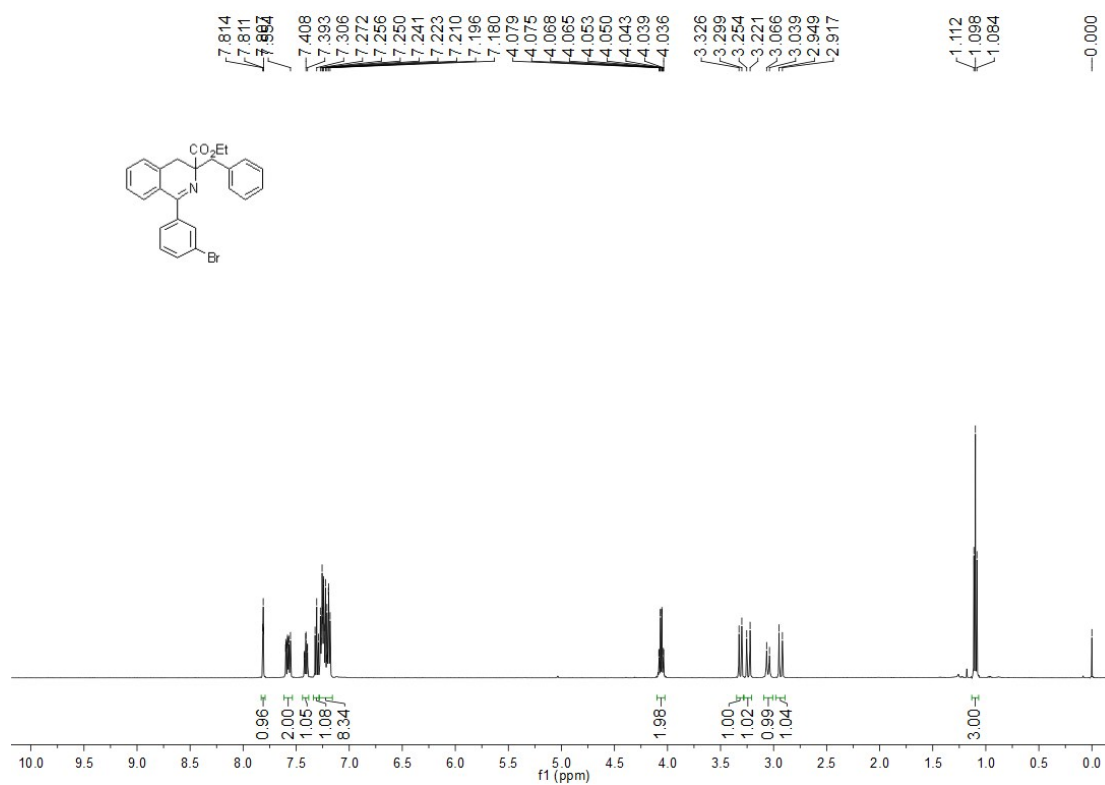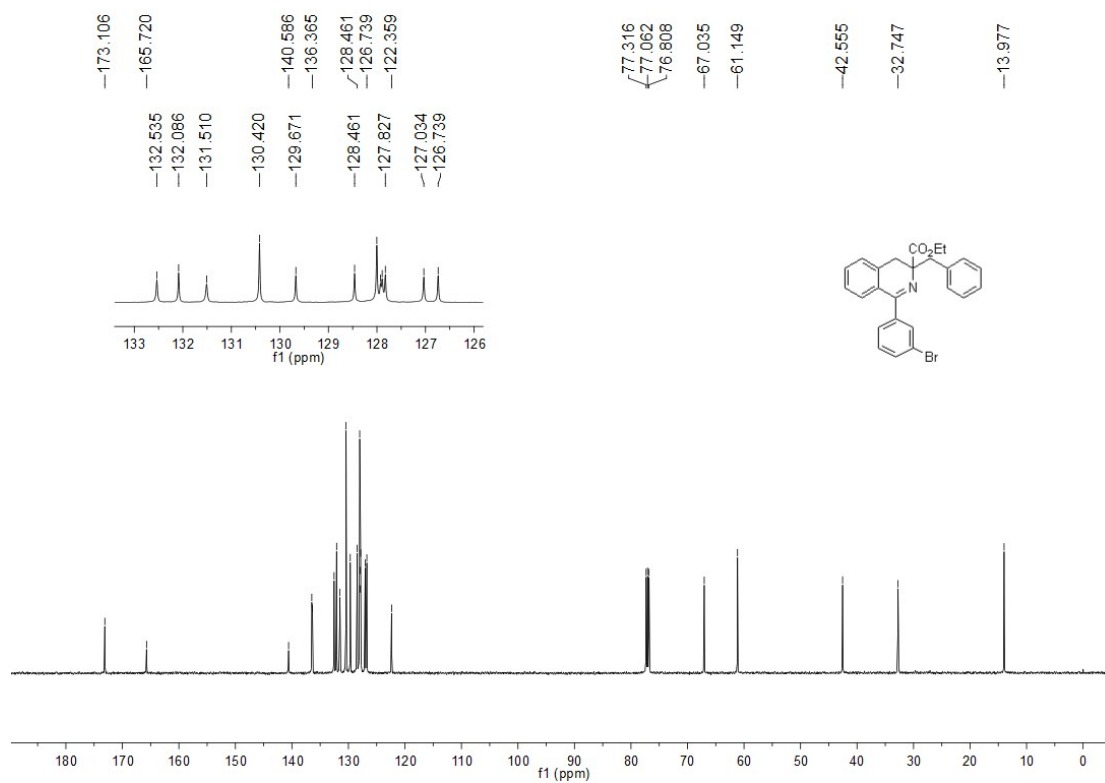

1g

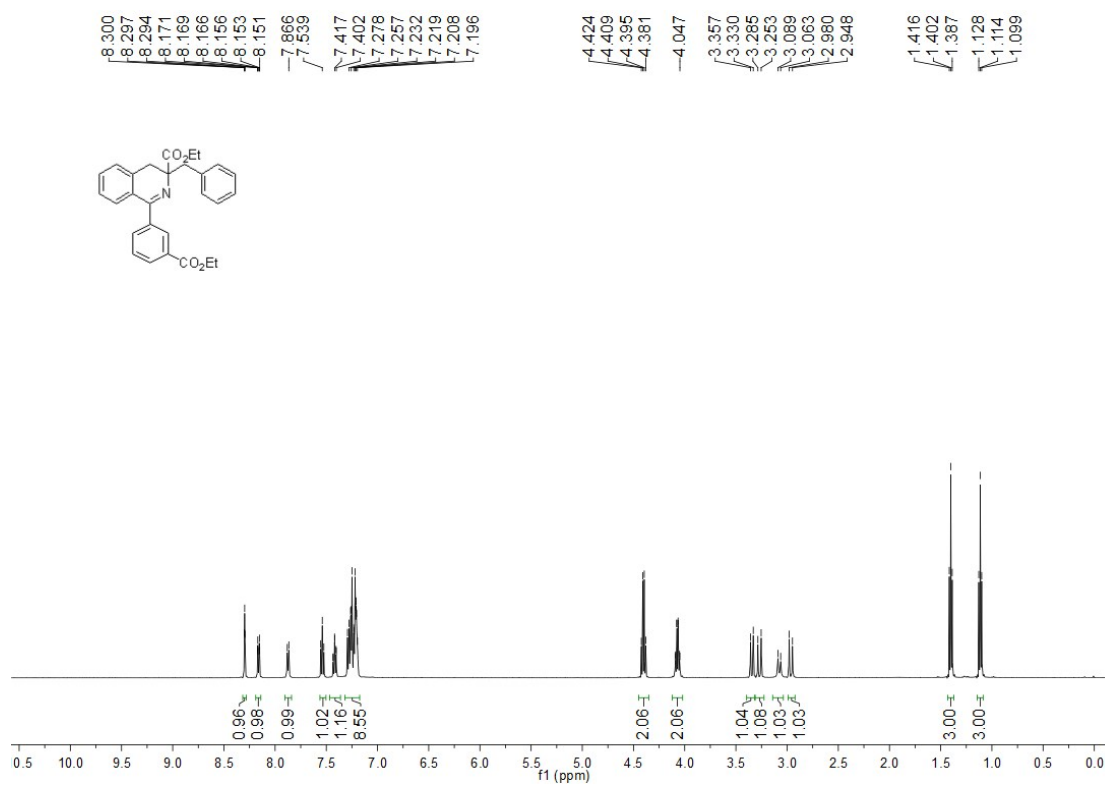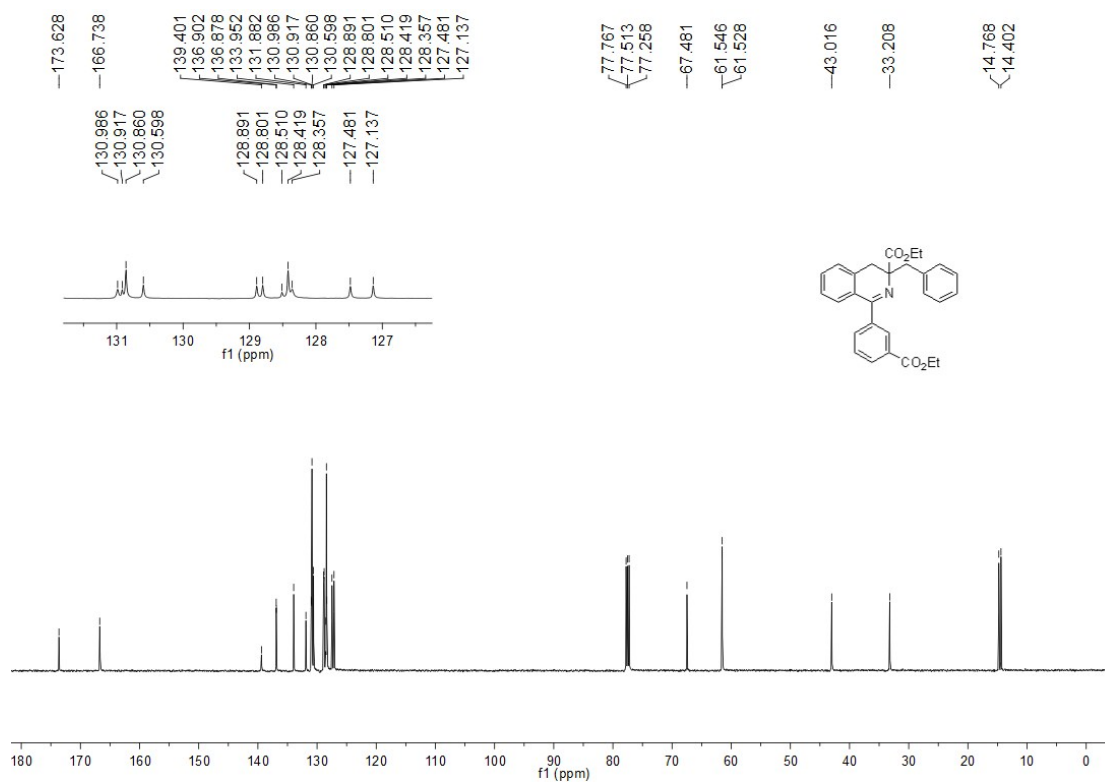

1h

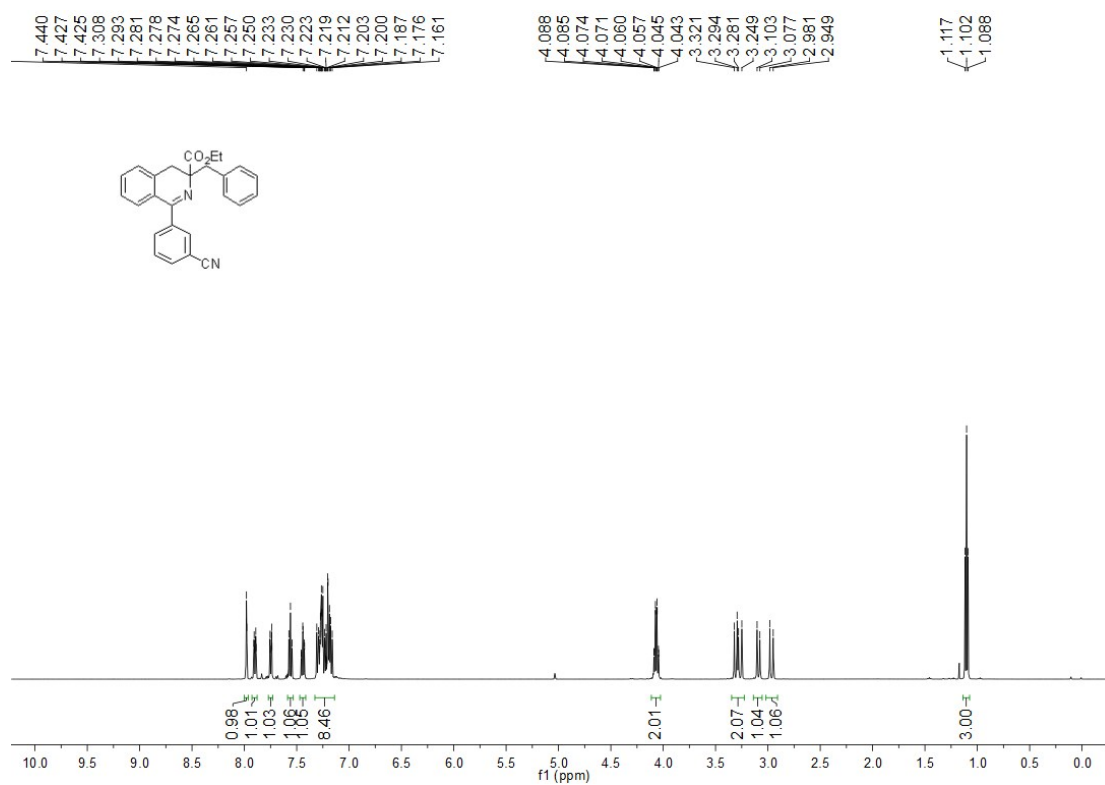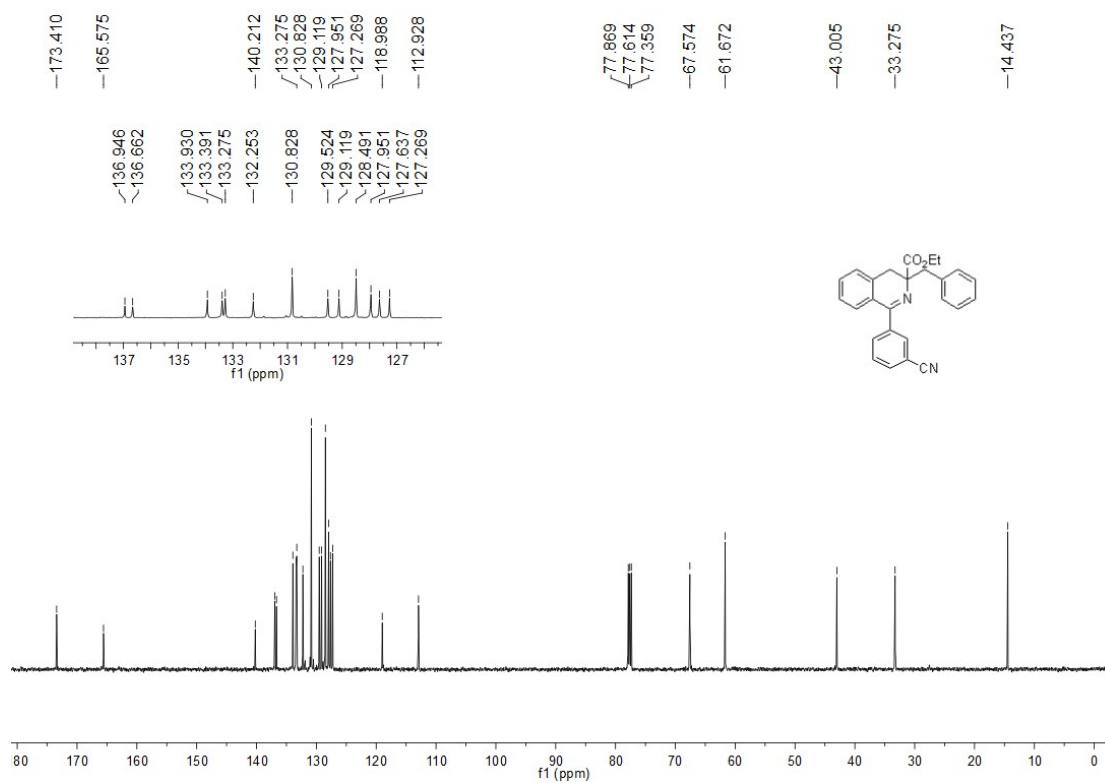

1i

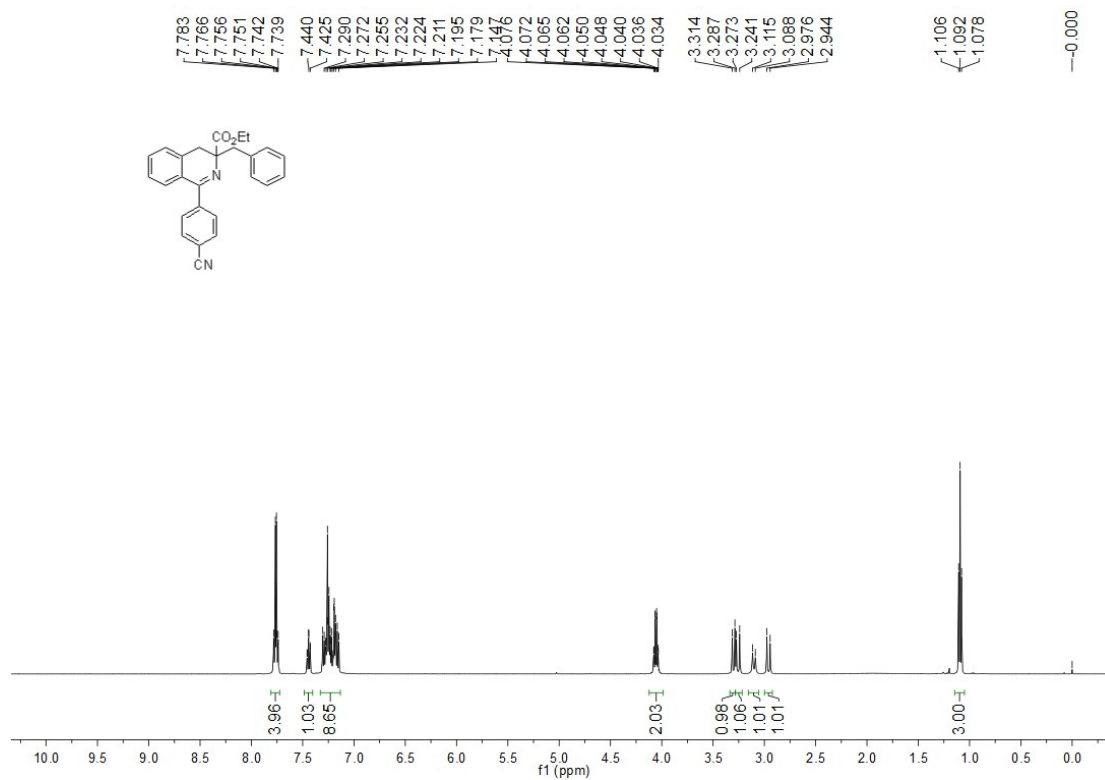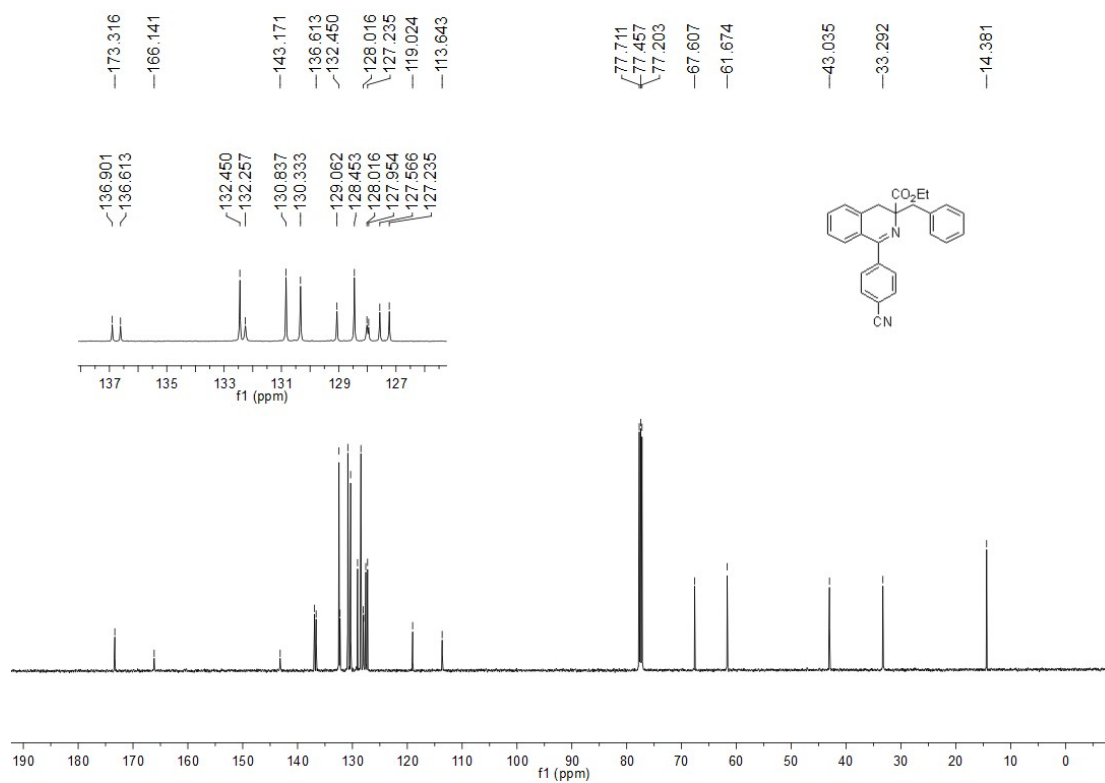

1j

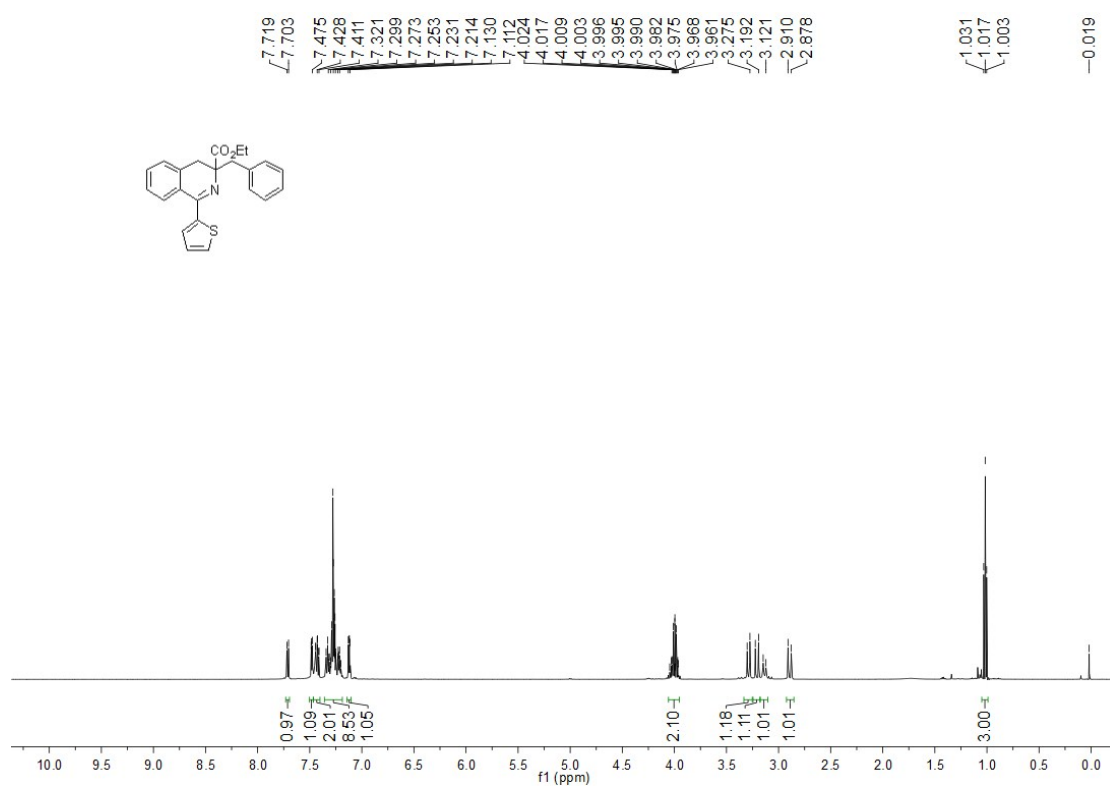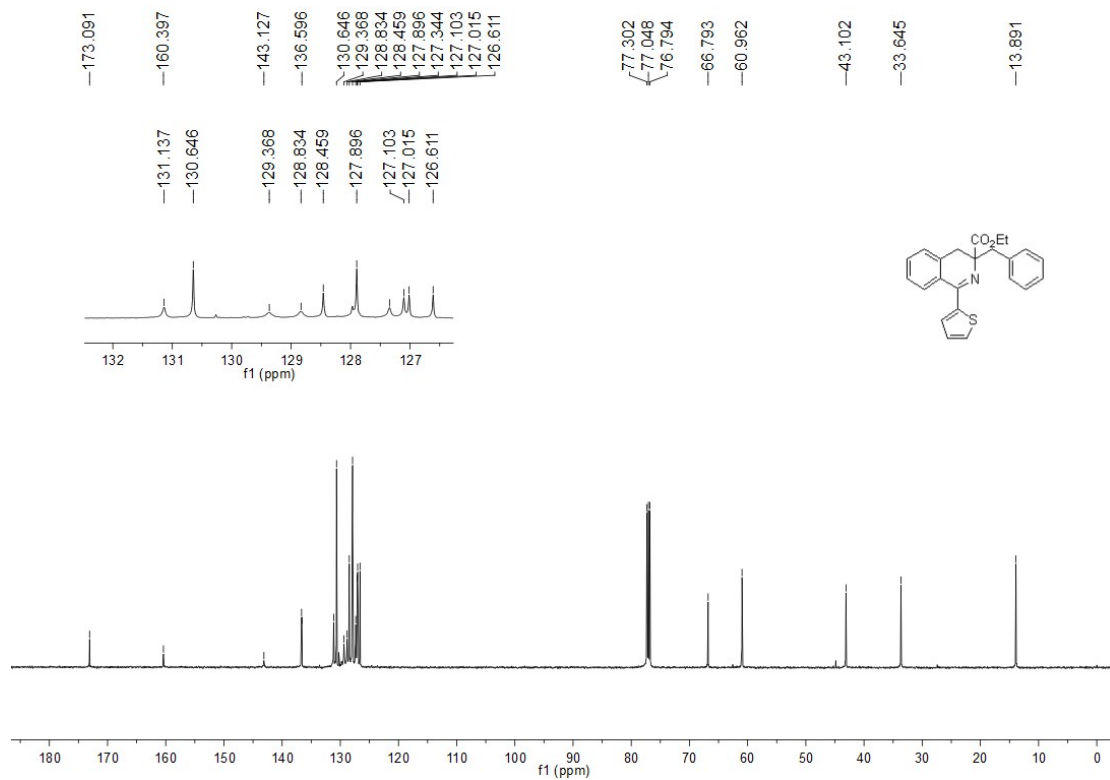

1k

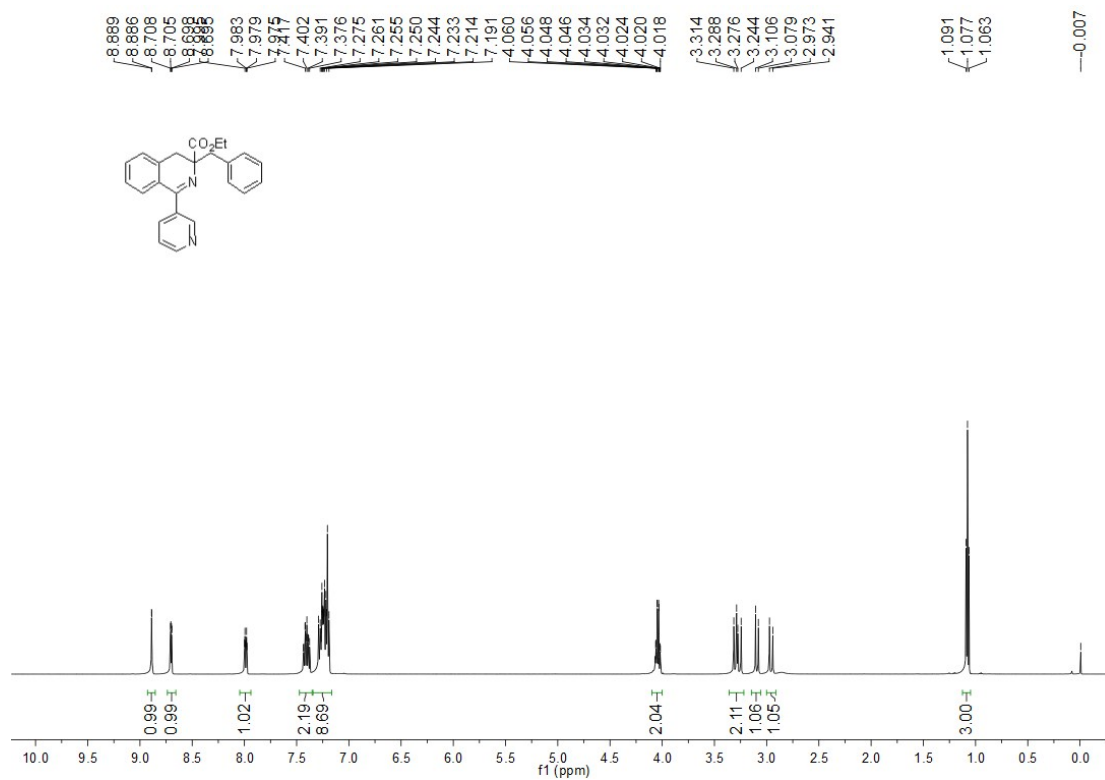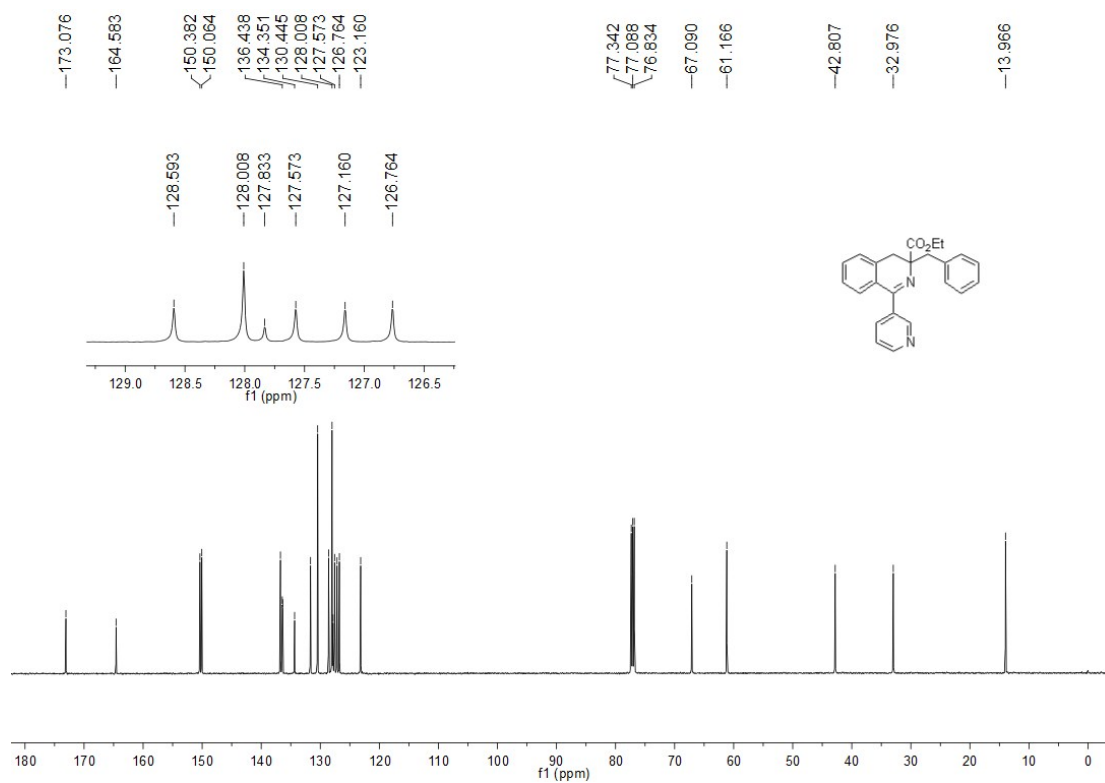

11

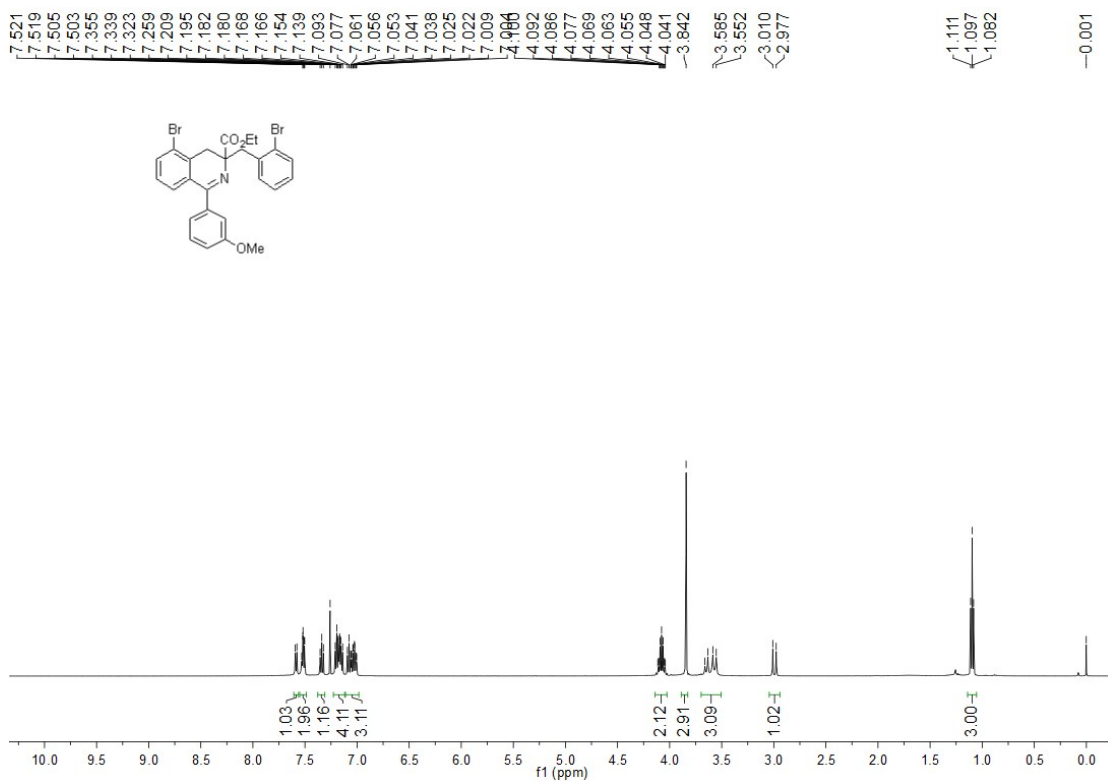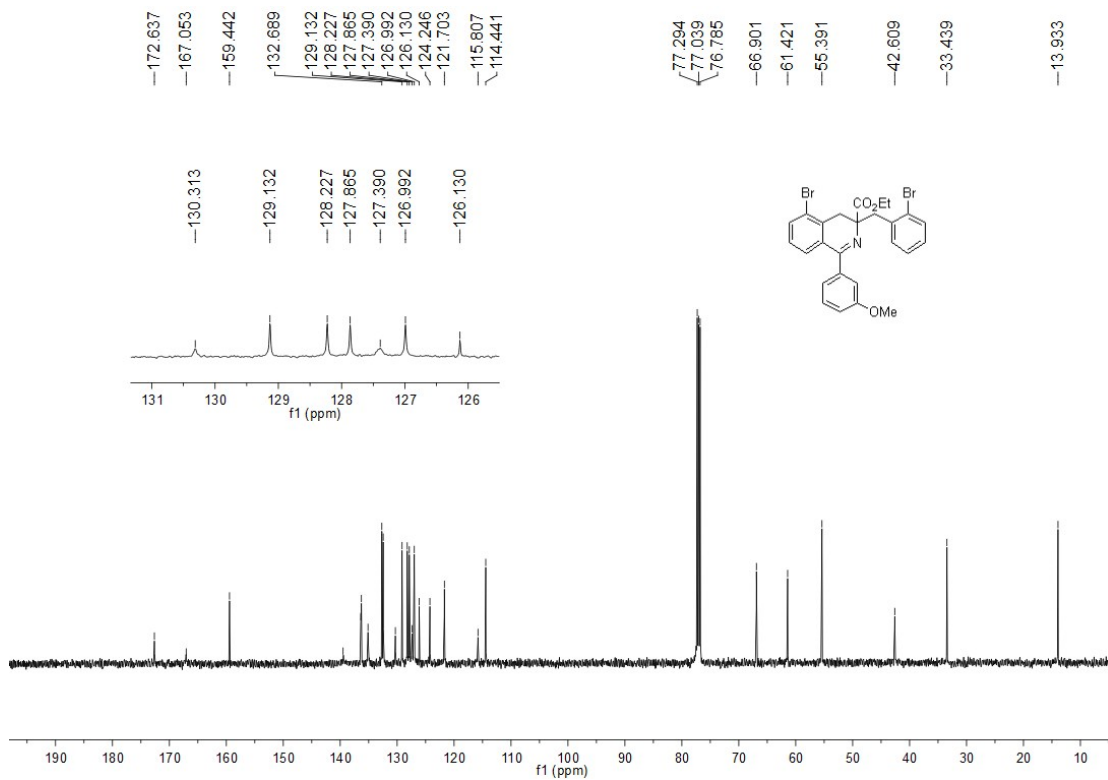

**1m**

7.514  
7.508  
7.422  
7.418  
7.391  
7.386  
7.381  
7.376  
7.368  
7.365  
7.360  
7.258  
7.178  
7.173  
7.157  
7.138  
7.130  
7.122  
7.113  
7.055  
7.053  
7.050  
7.048  
7.038  
7.037  
7.033

4.039  
4.025  
4.010  
3.996  
3.859  
3.239  
3.178  
3.096  
2.851  
2.819

1.089  
1.075  
1.061

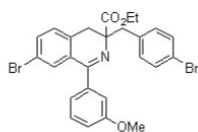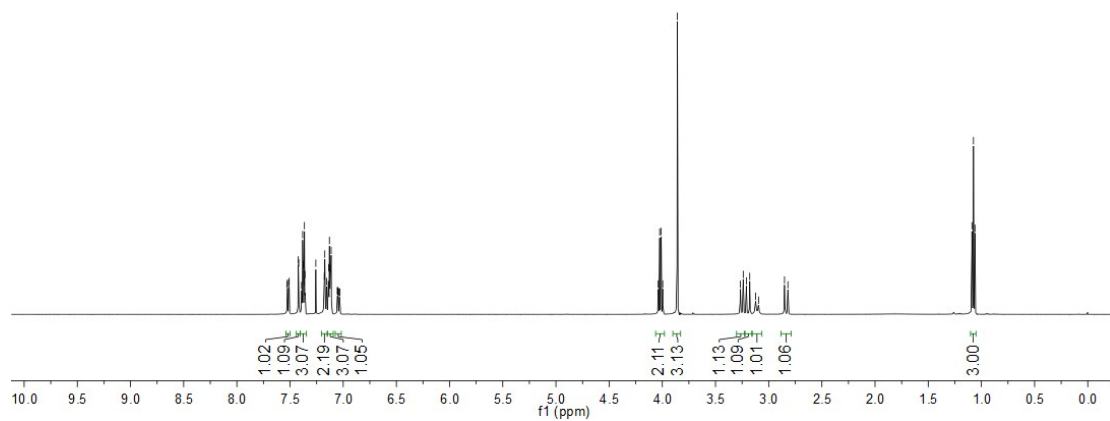

-173.049  
-166.283  
-160.041  
-139.517  
-132.686  
-129.788  
-121.897  
-120.933  
-116.400  
-114.665

77.734  
77.480  
77.226  
67.124  
61.735  
55.821  
43.057  
33.443  
14.401

135.819  
135.519  
134.524  
132.686  
131.461  
130.316  
130.211  
129.788  
121.897  
121.269  
120.933

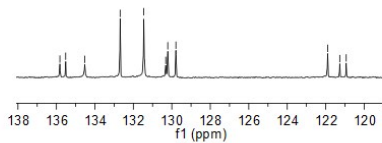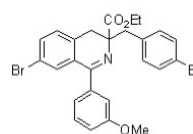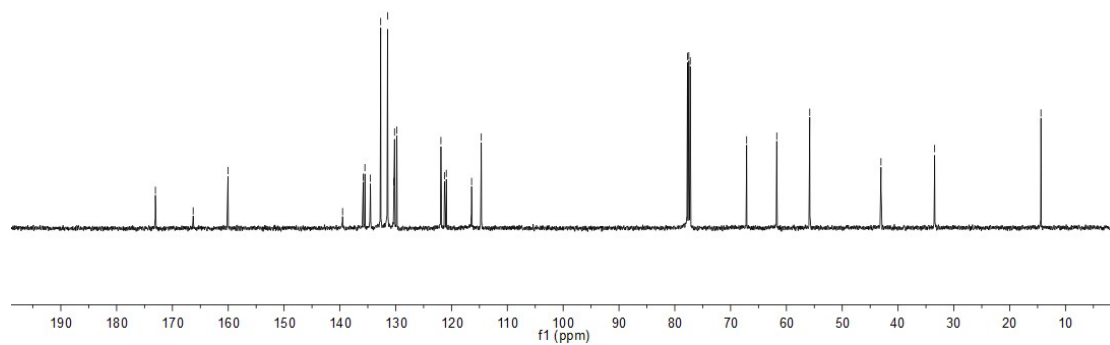



1n

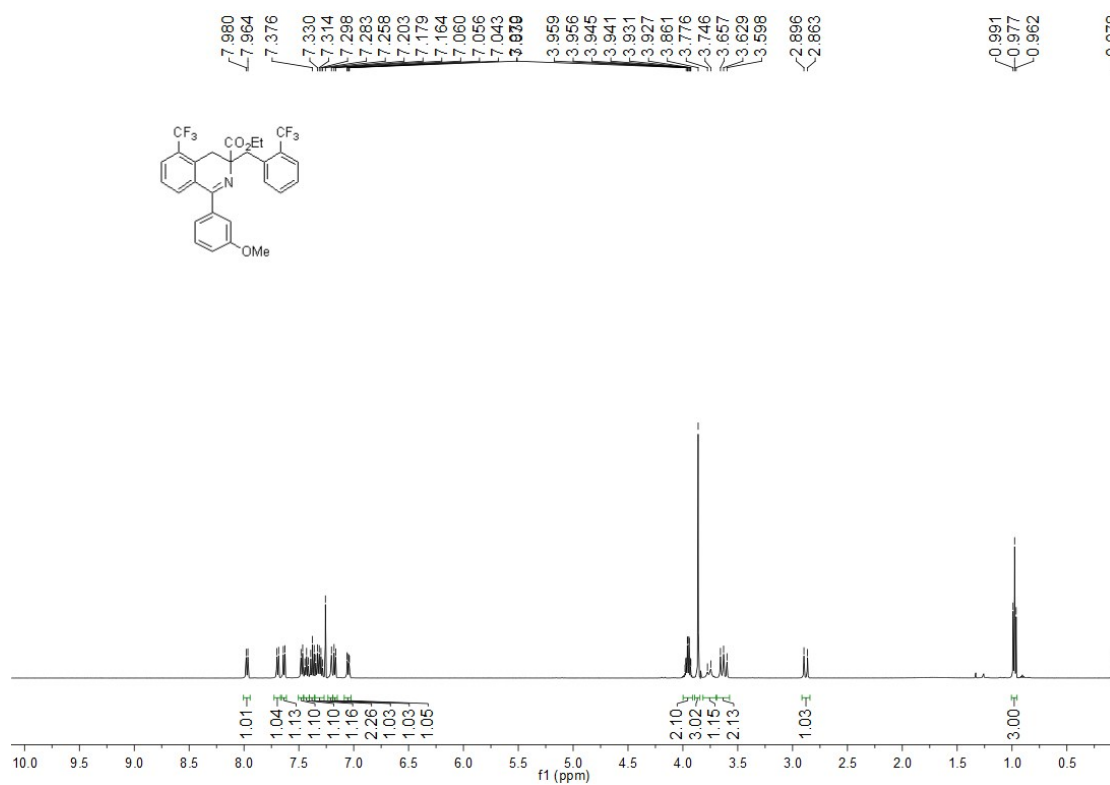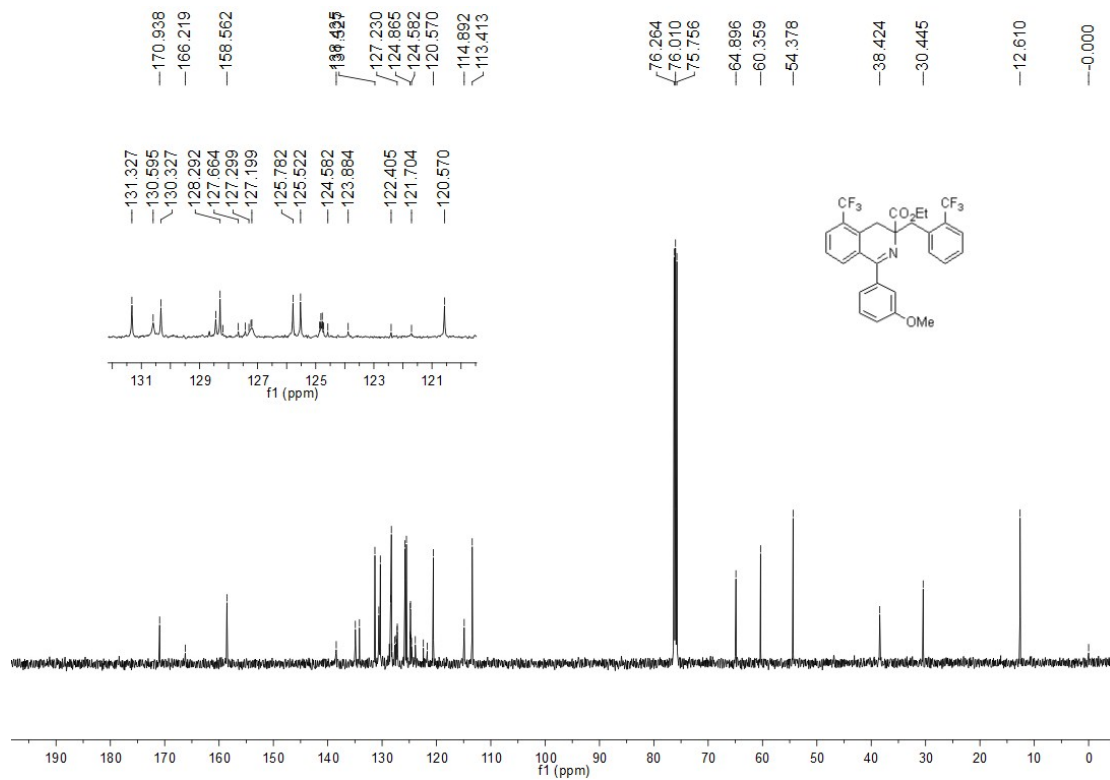

10

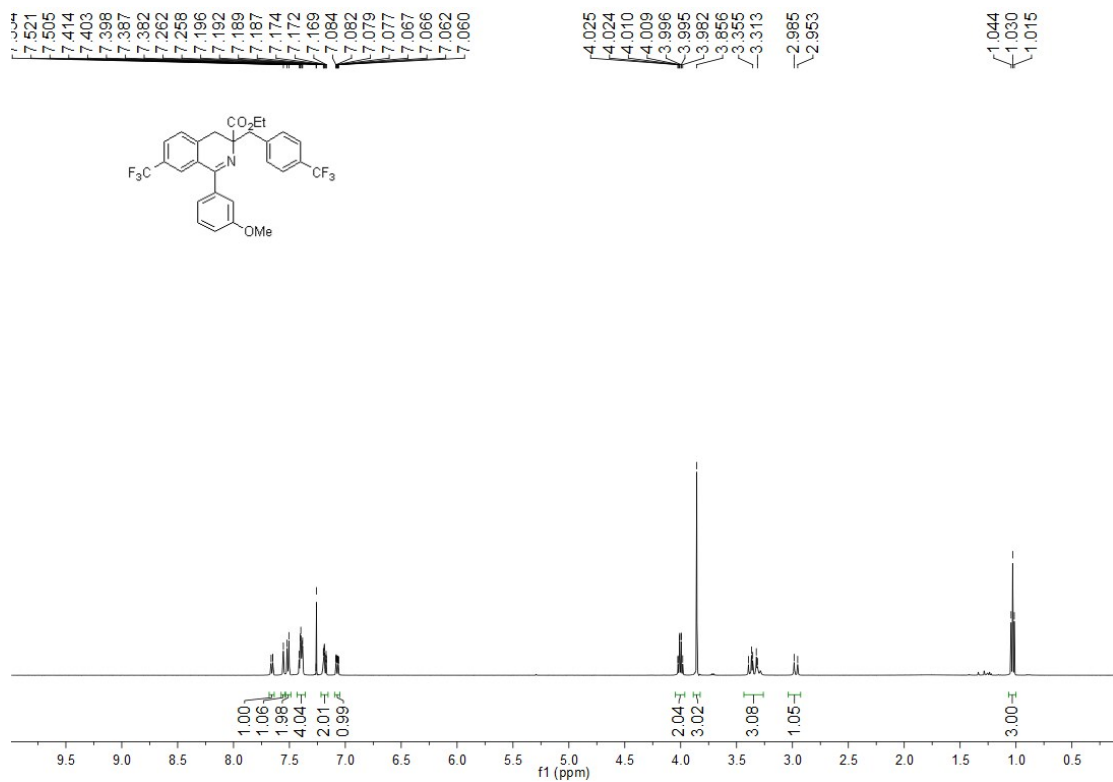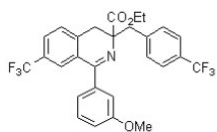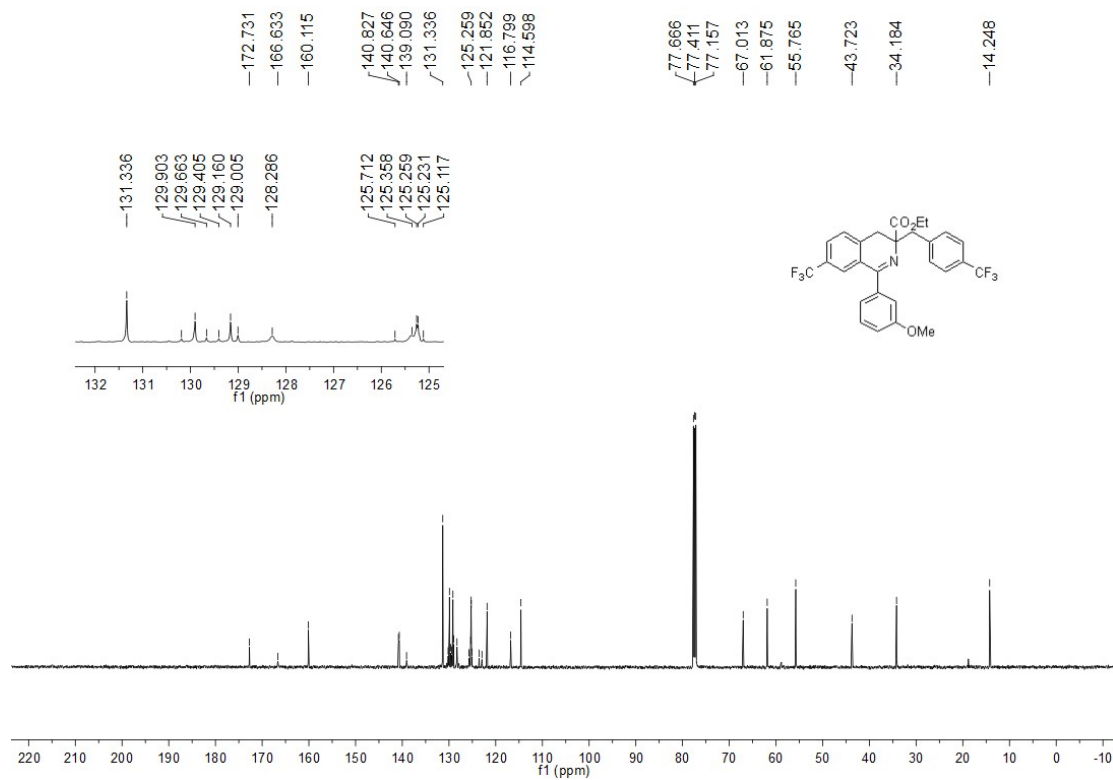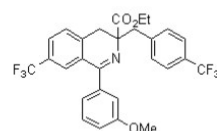

1p

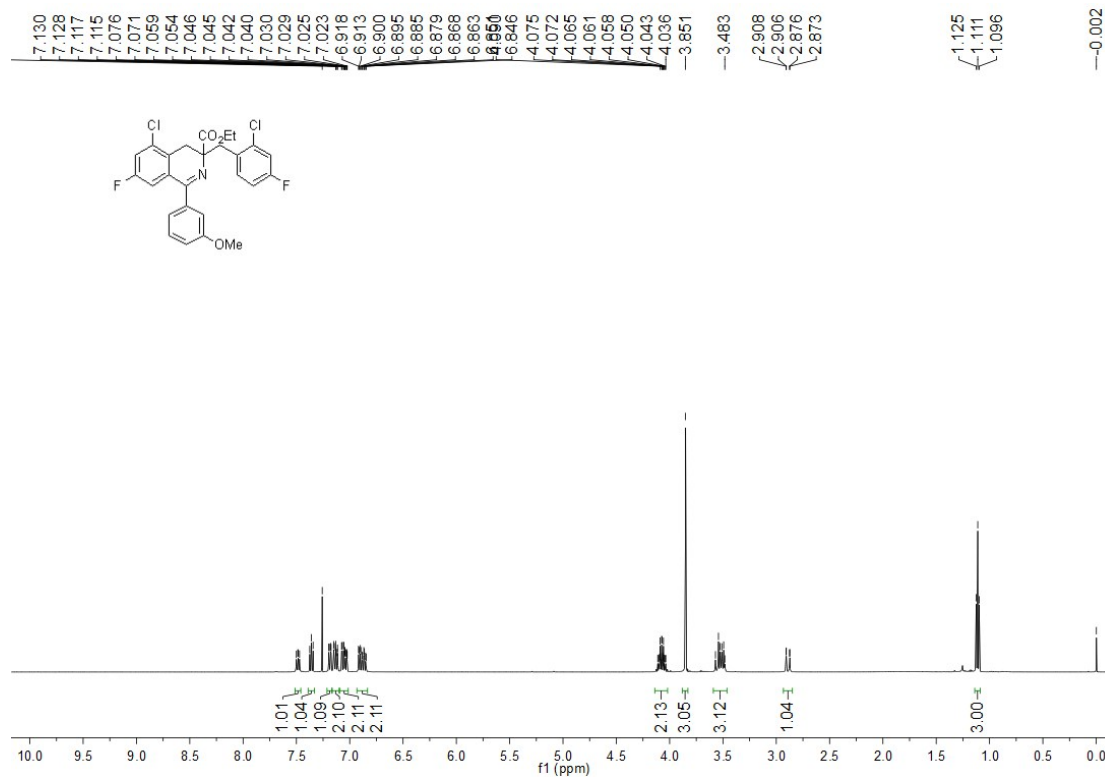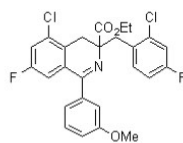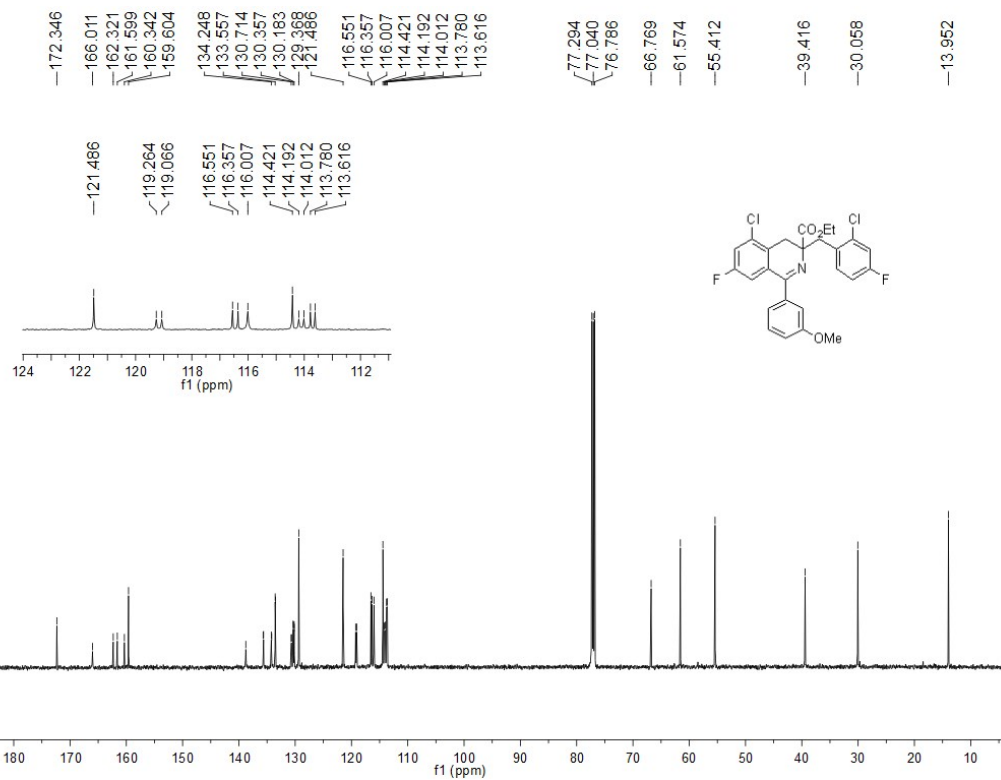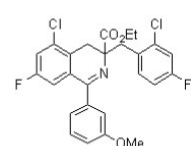

1q

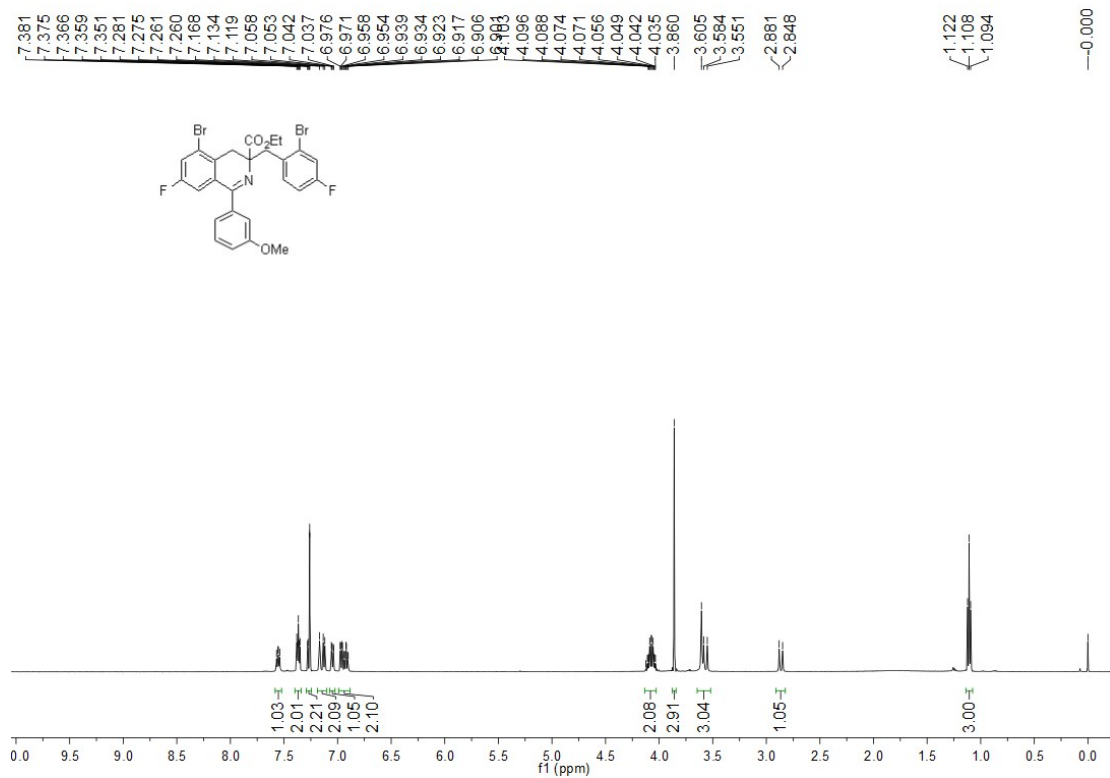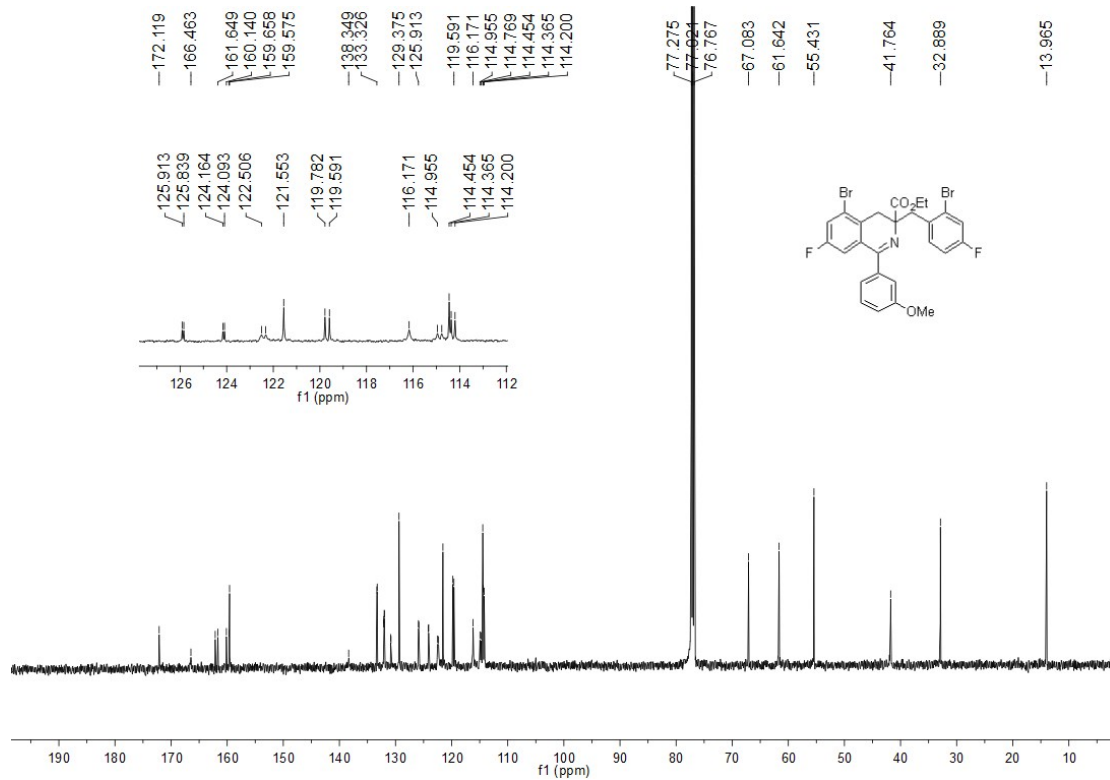

1r

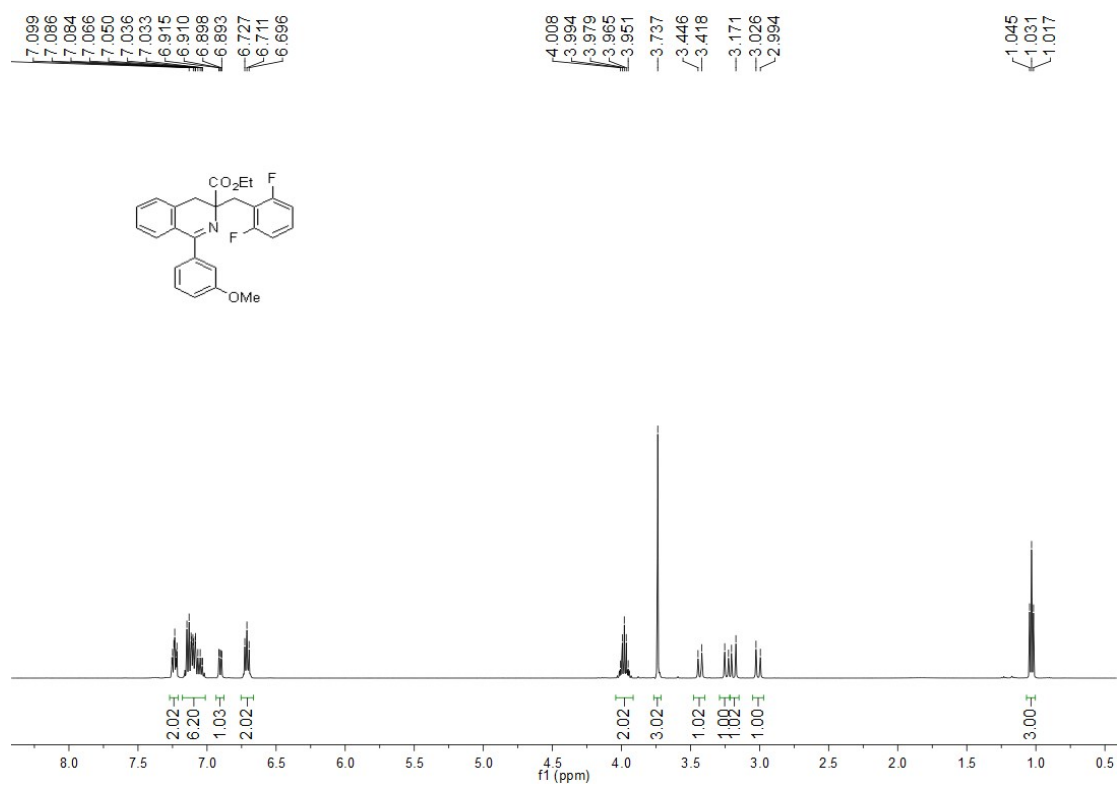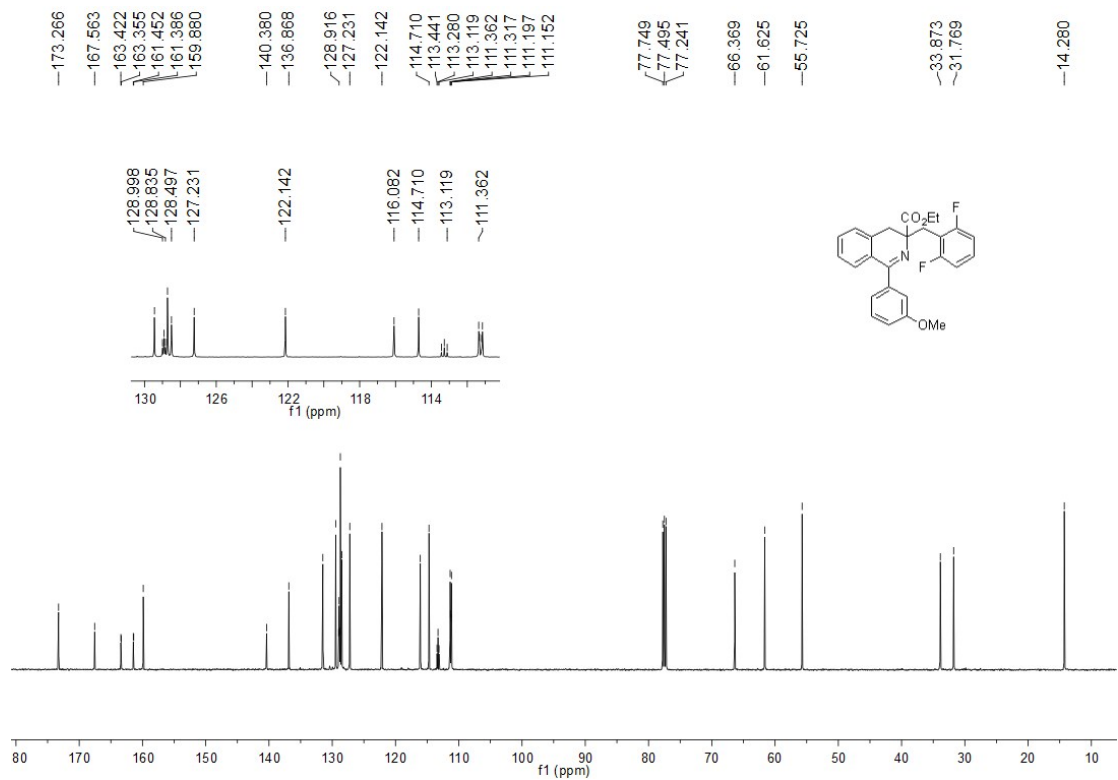

1s

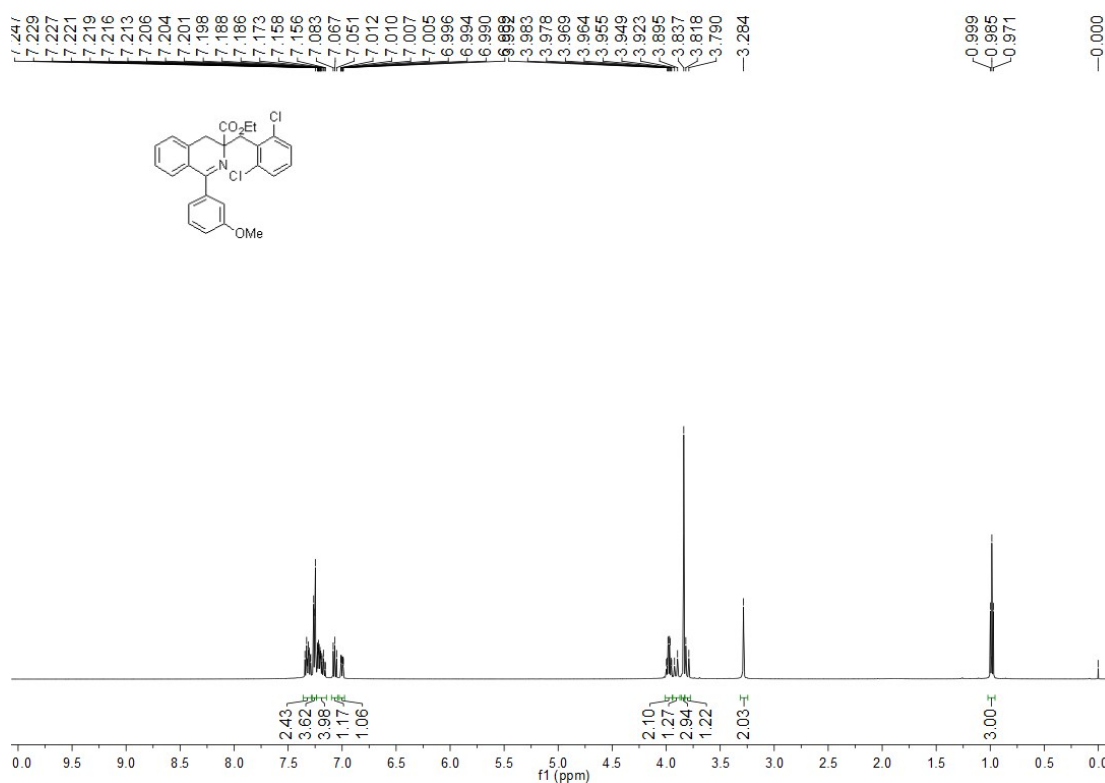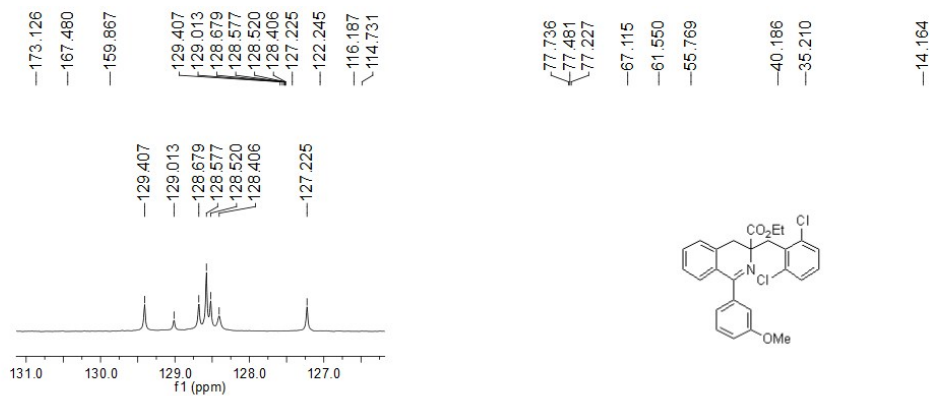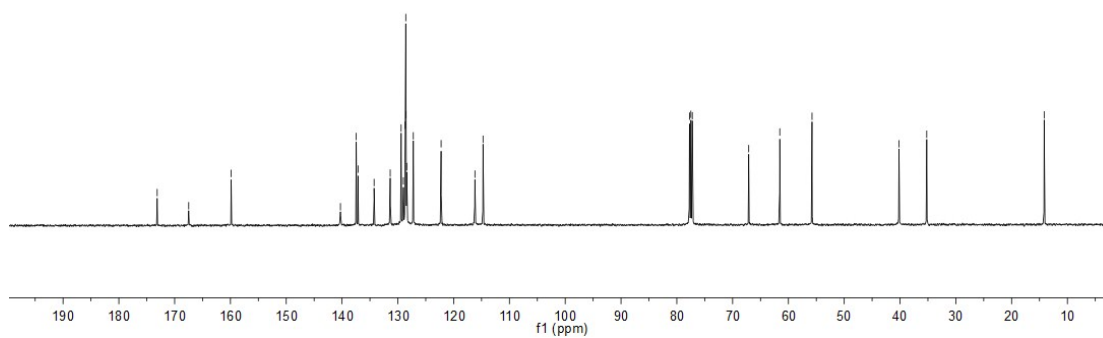

1t

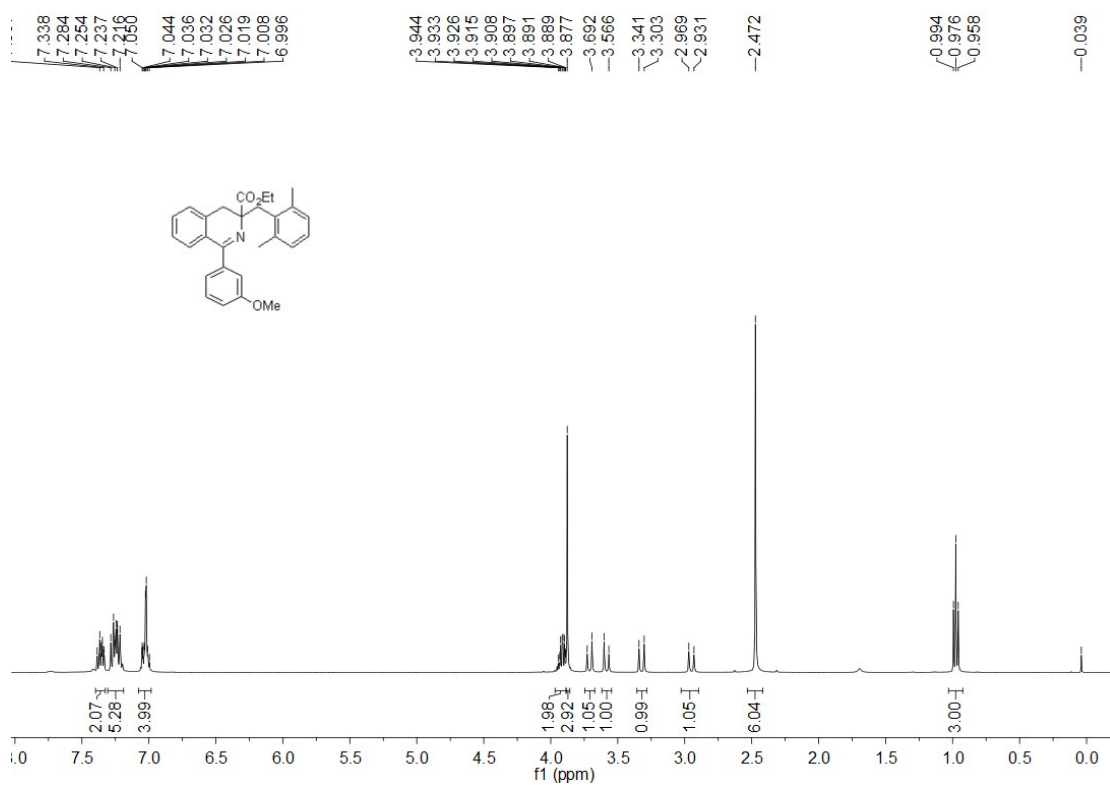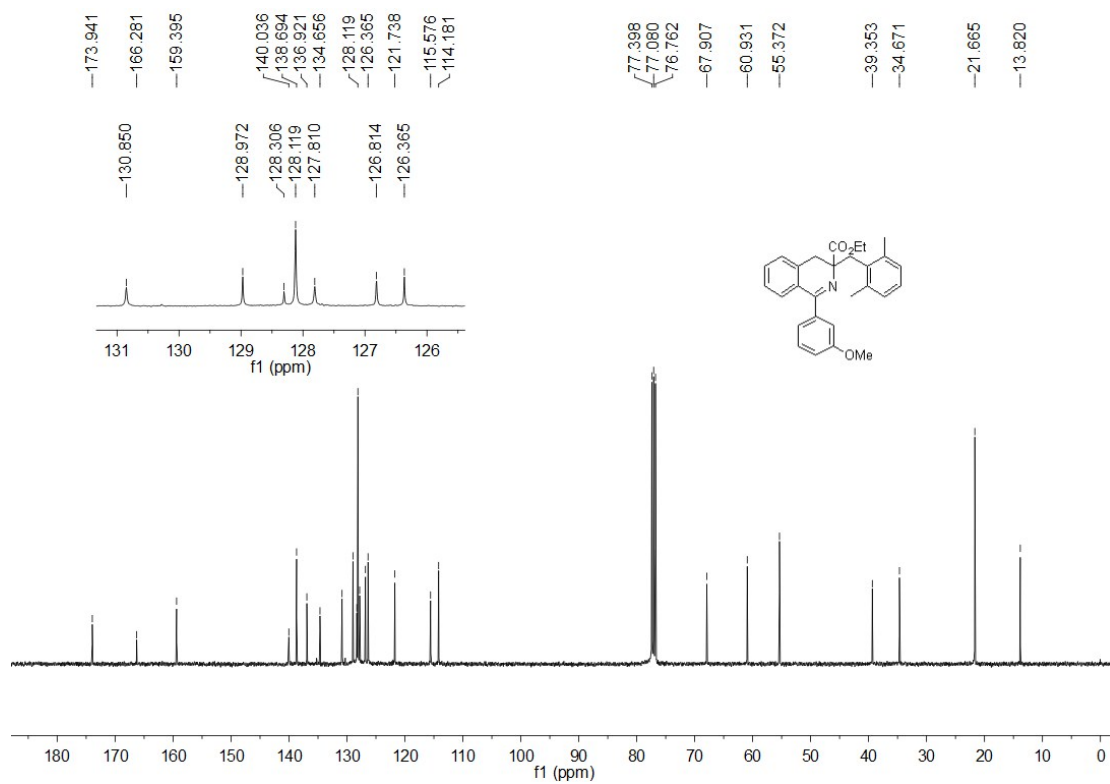

1u

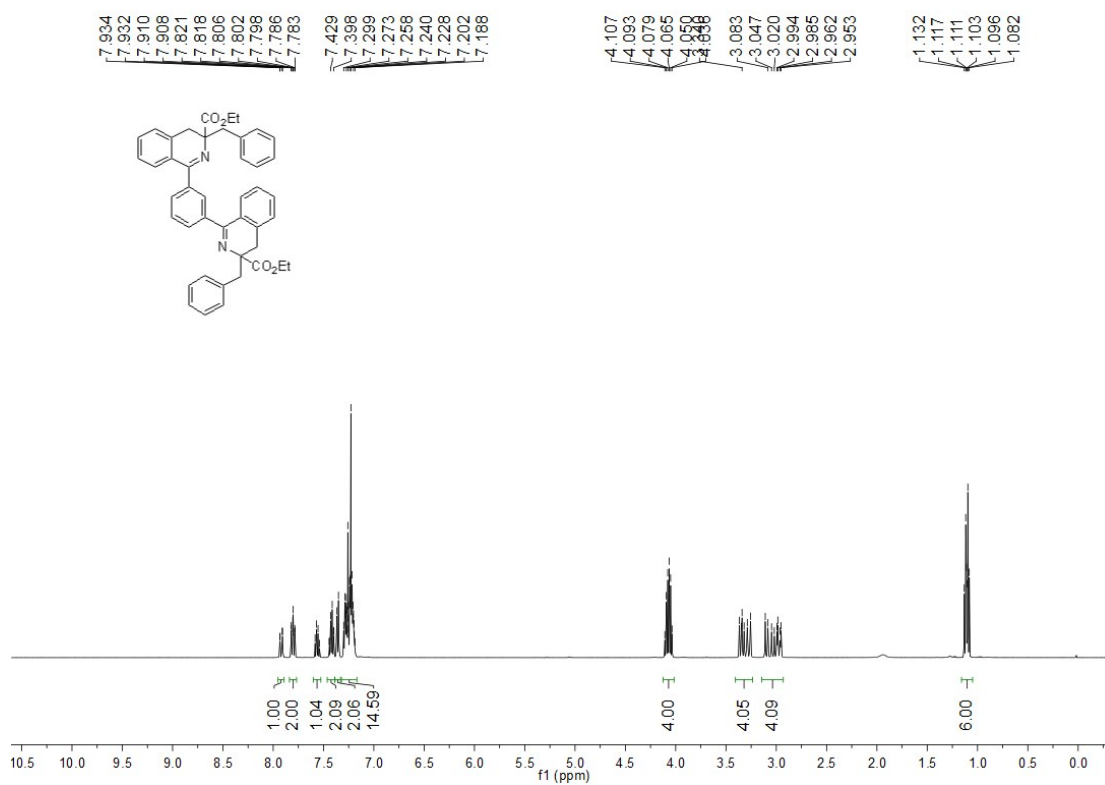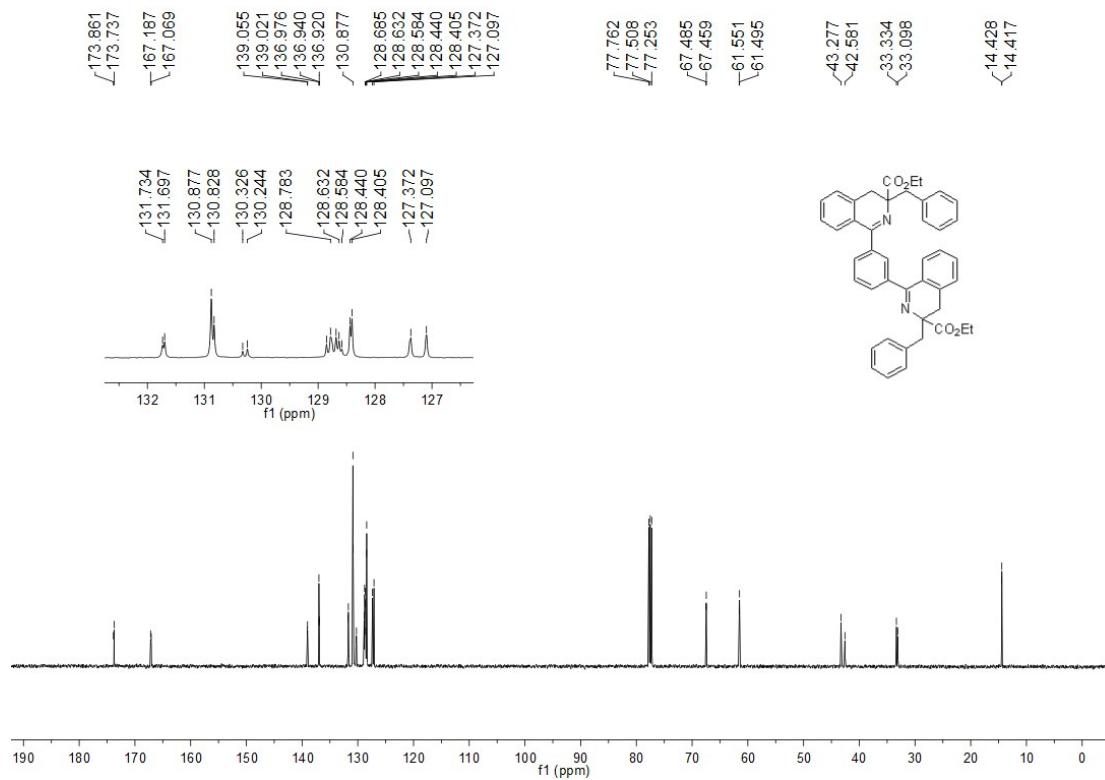



1v

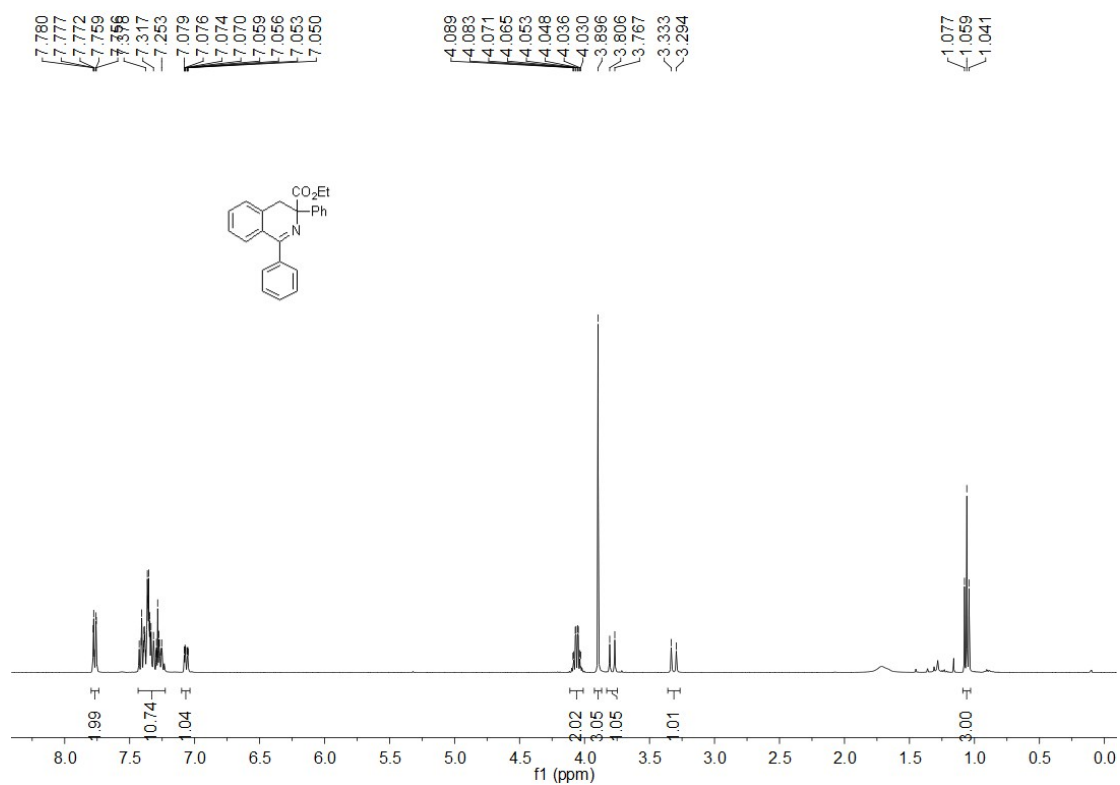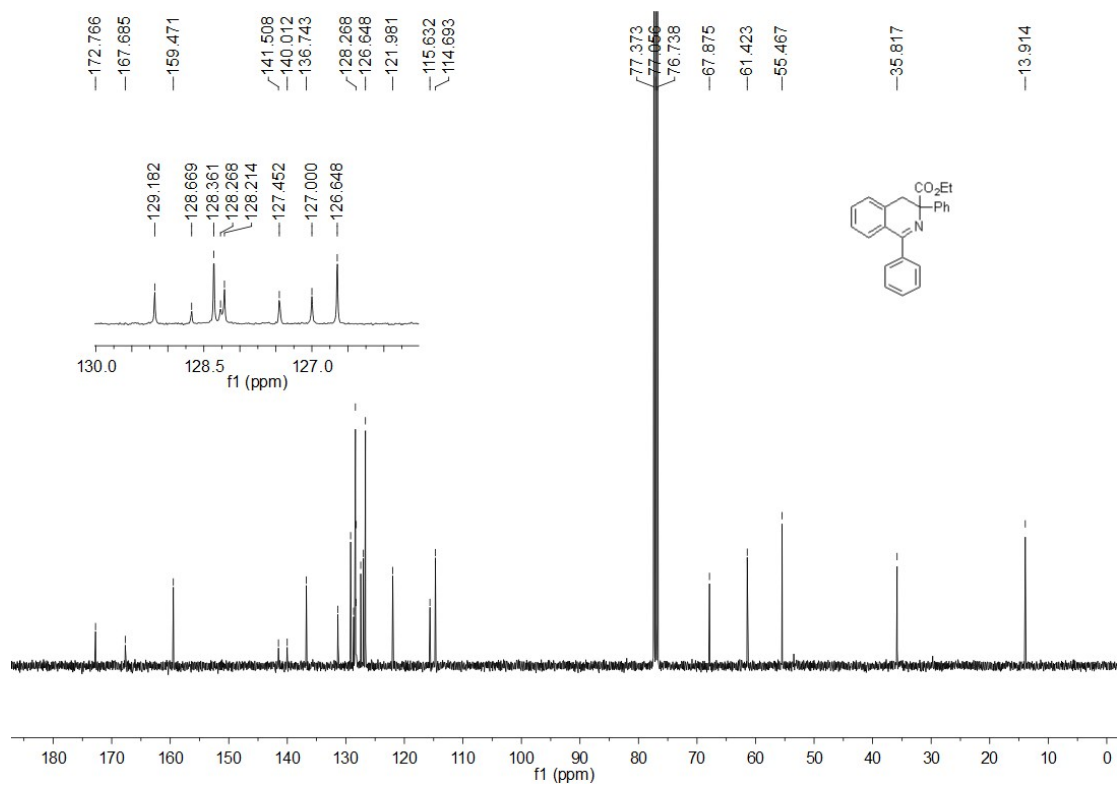

1w

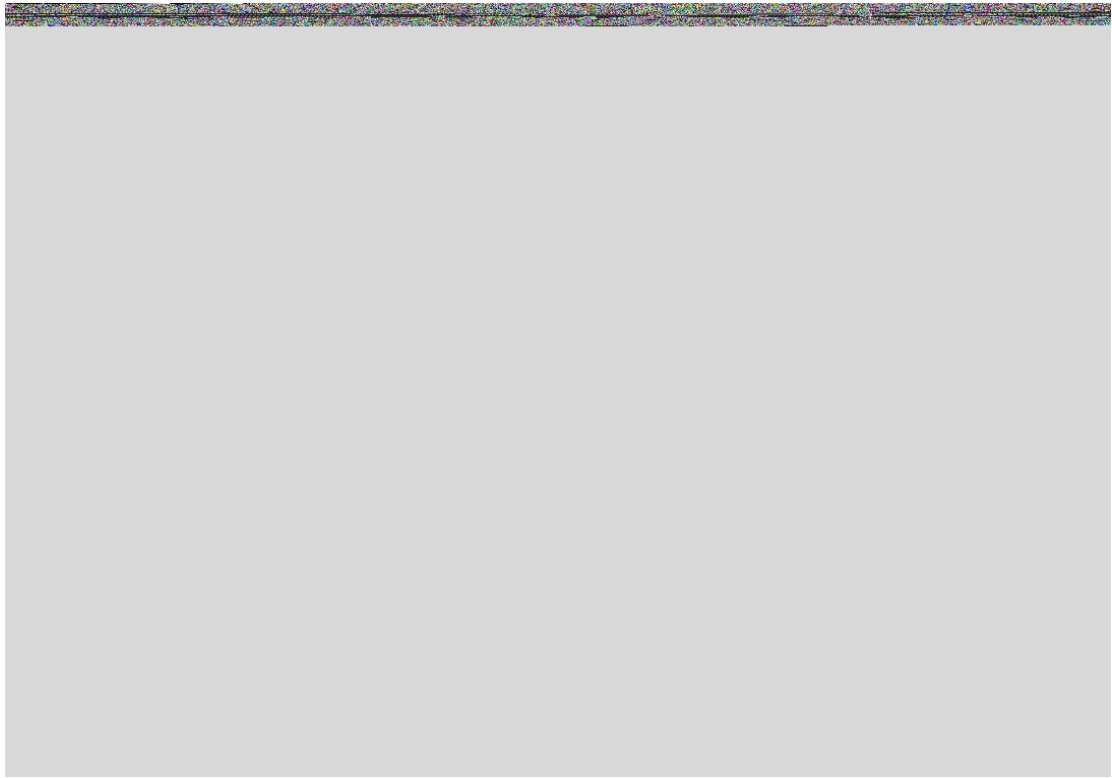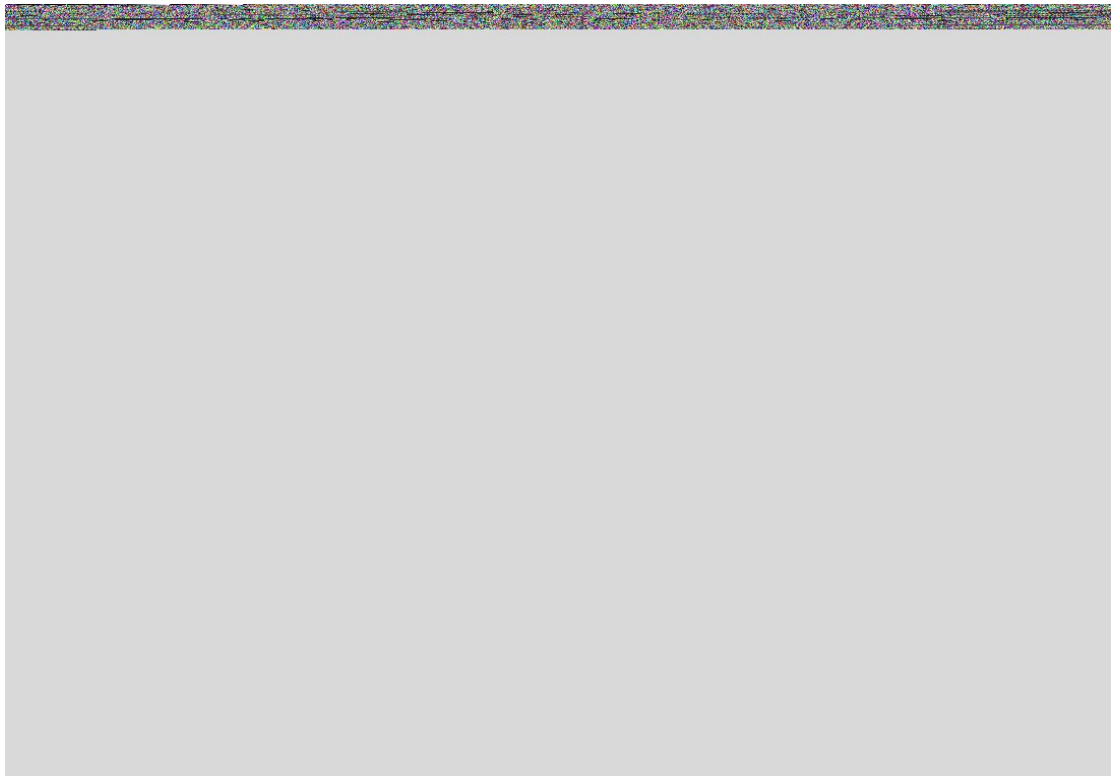

1x

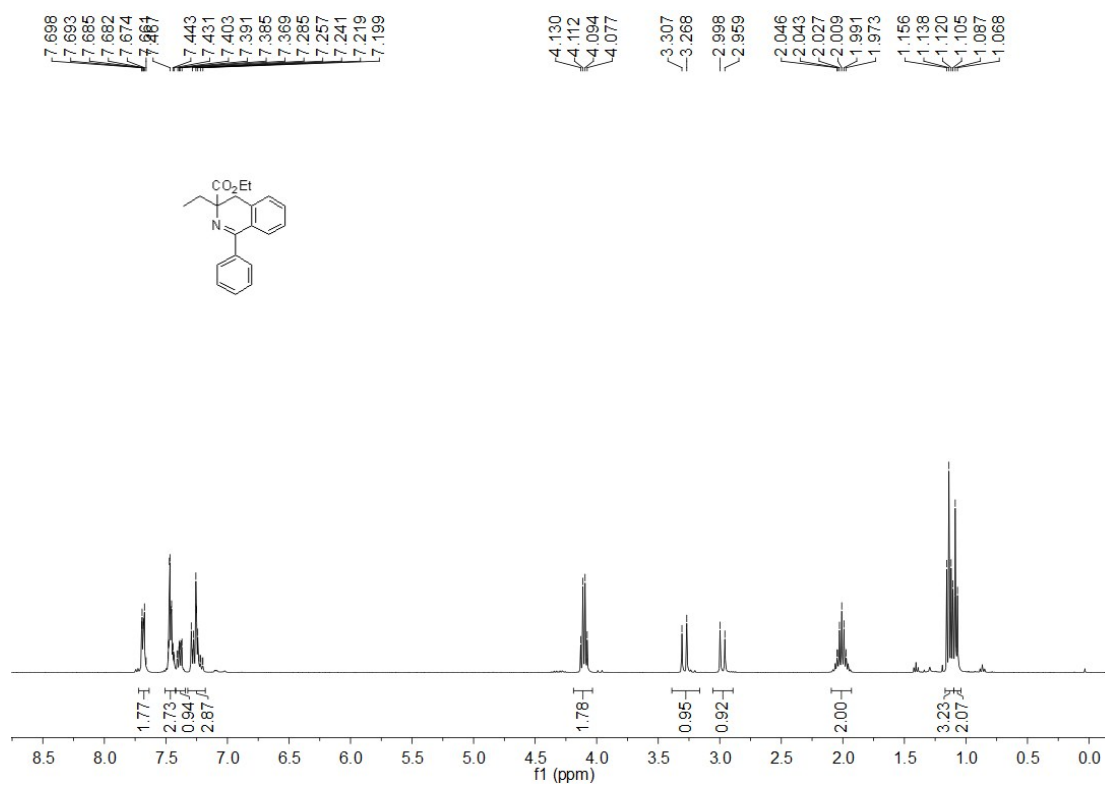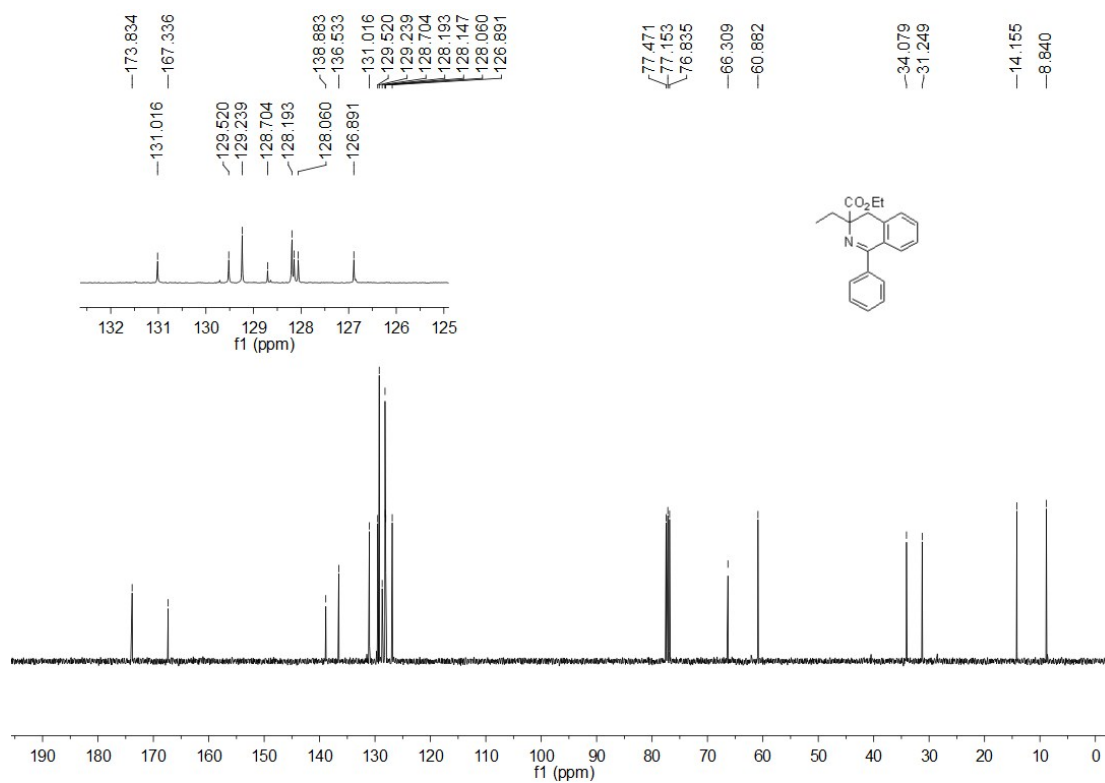

4a

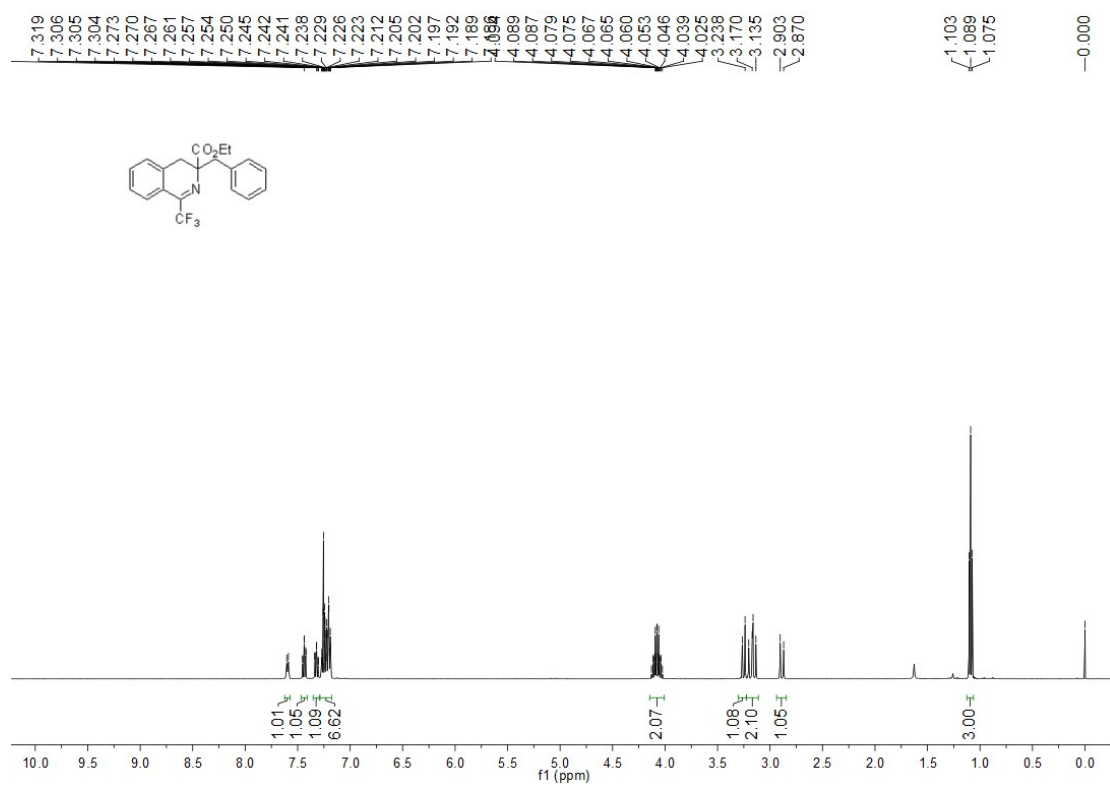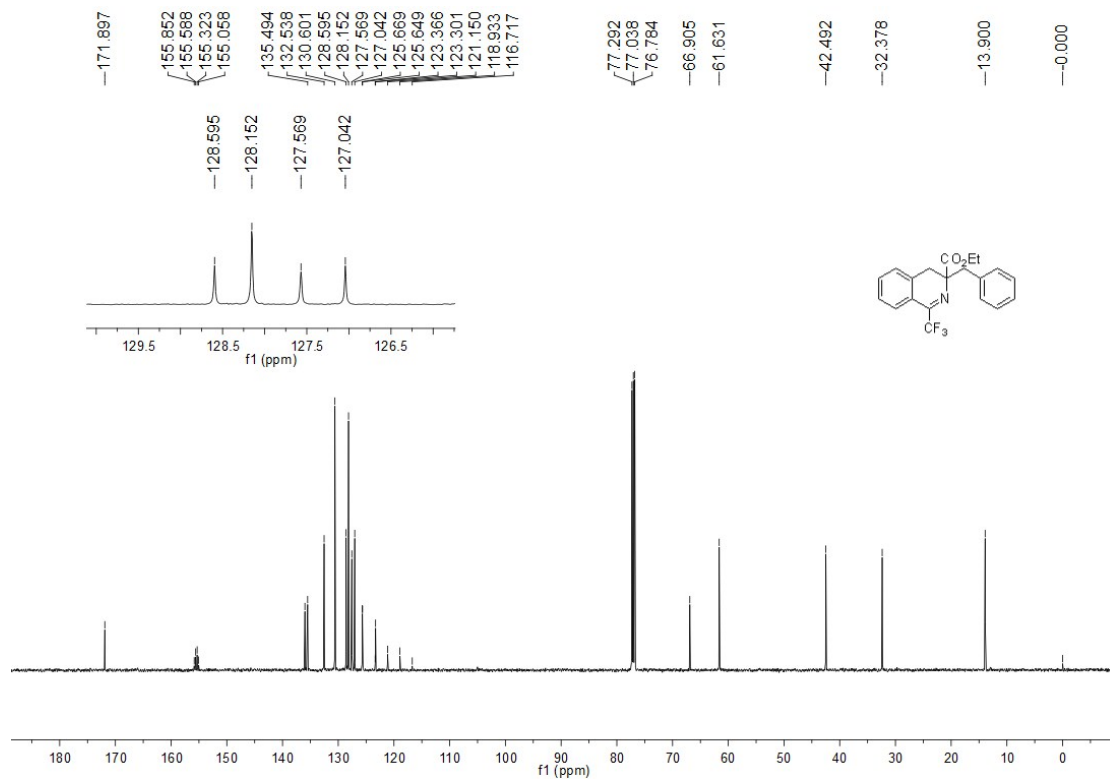

4b

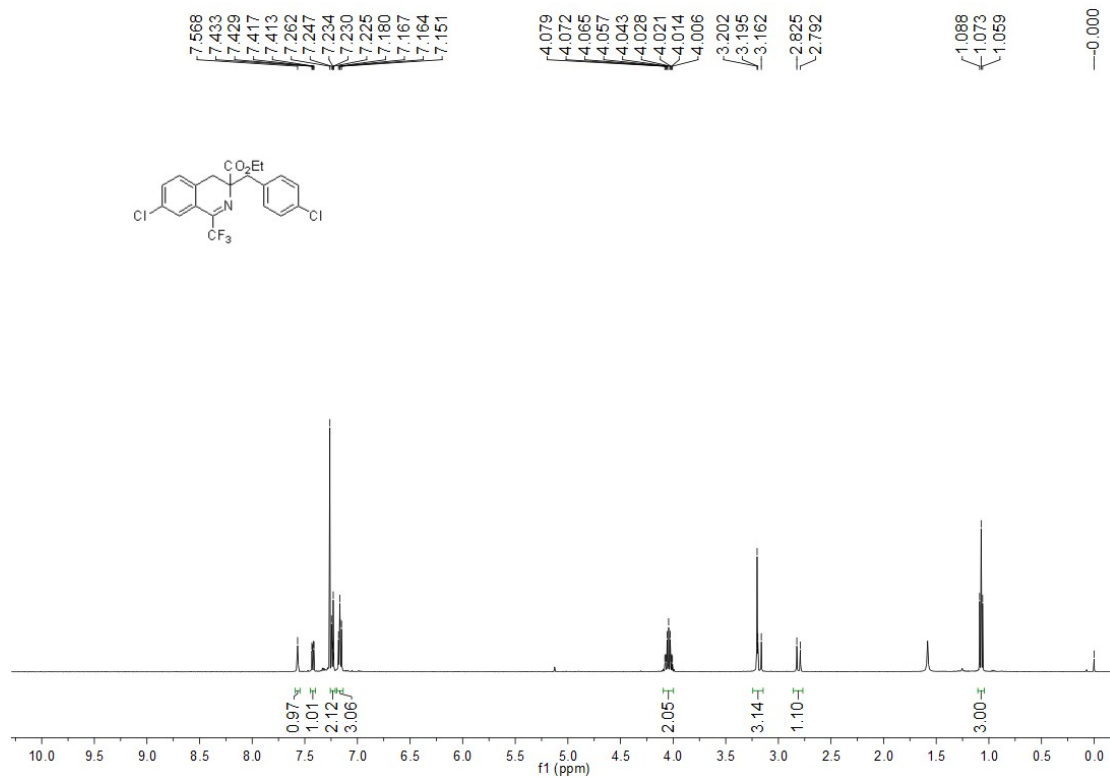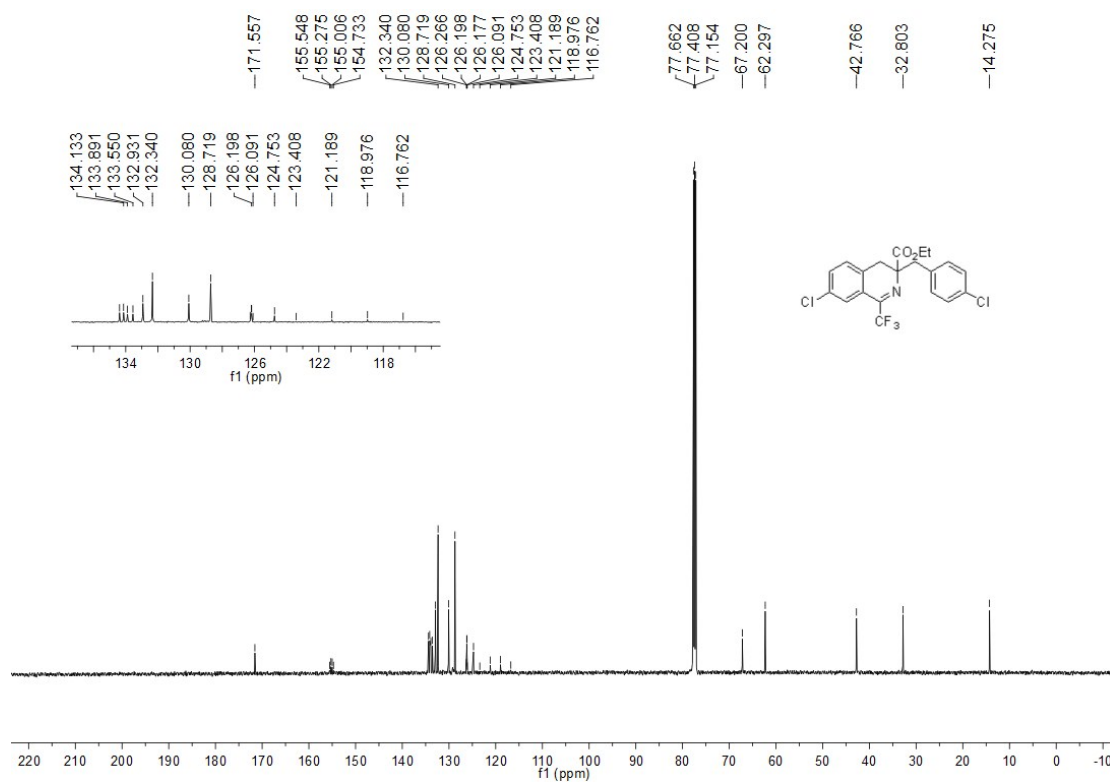

4c

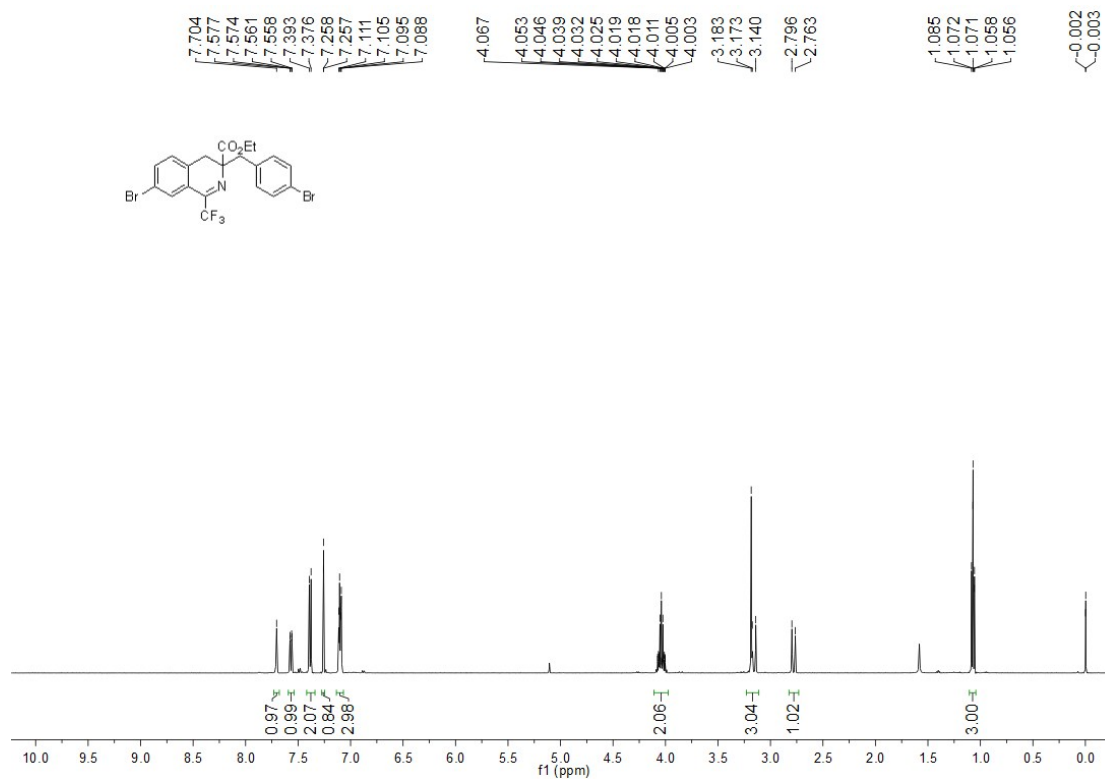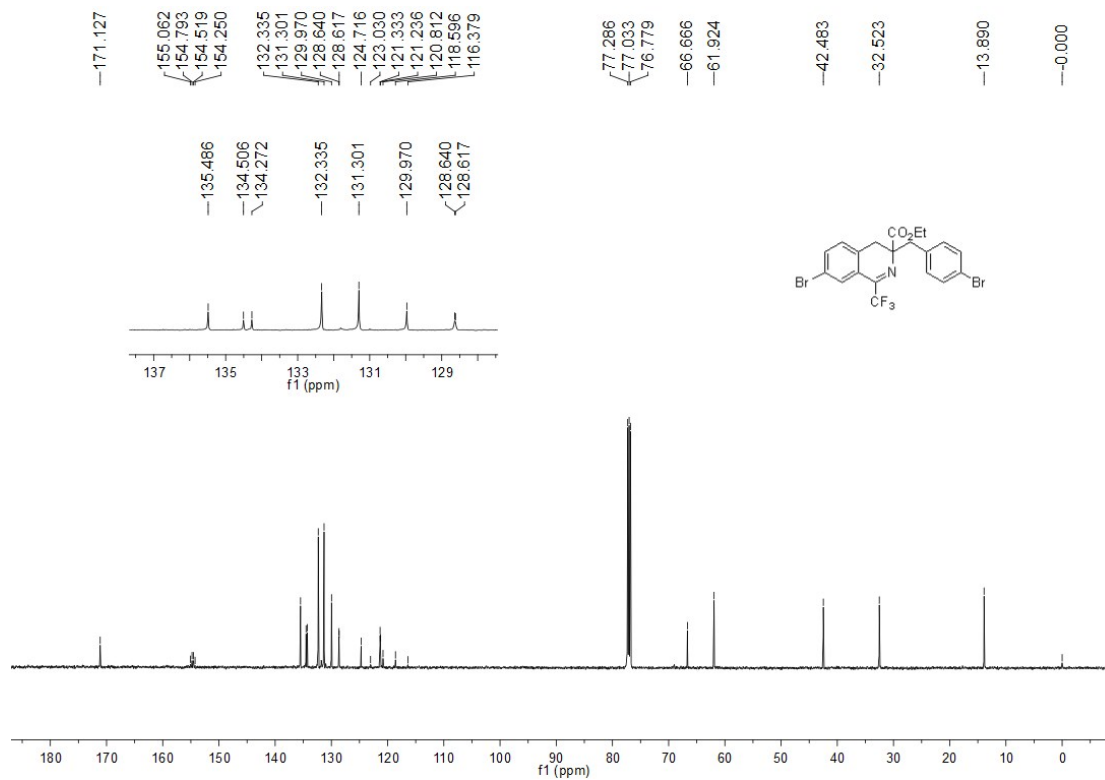

4d

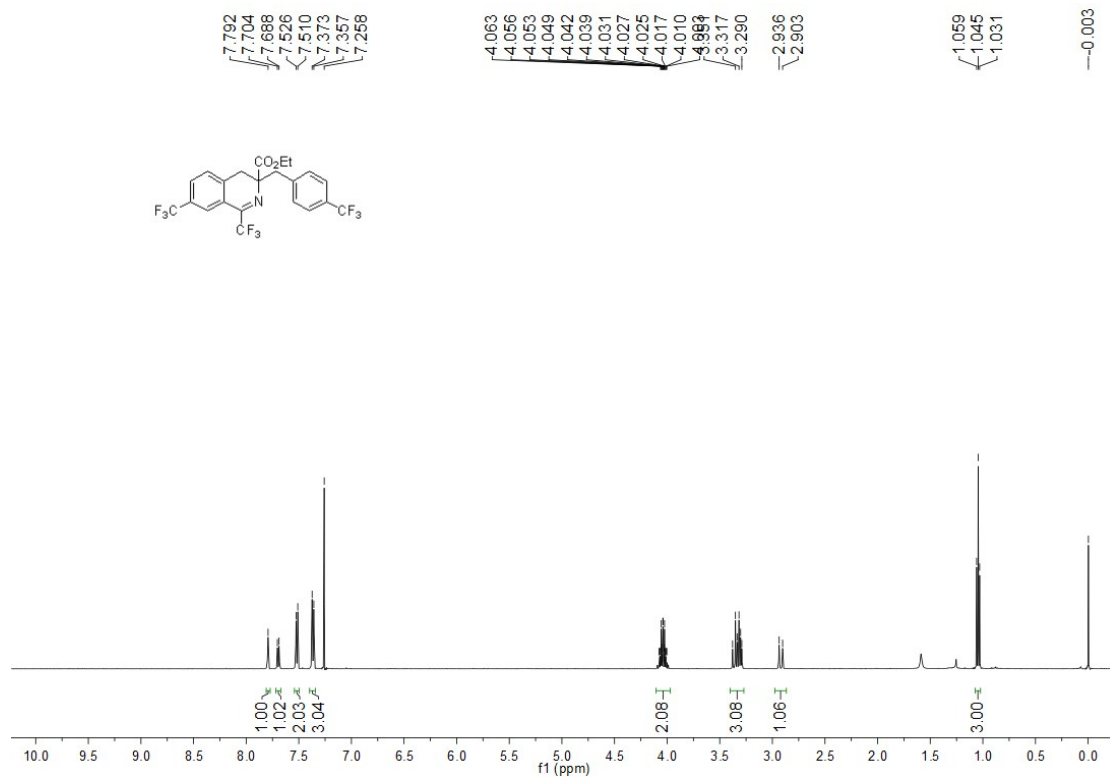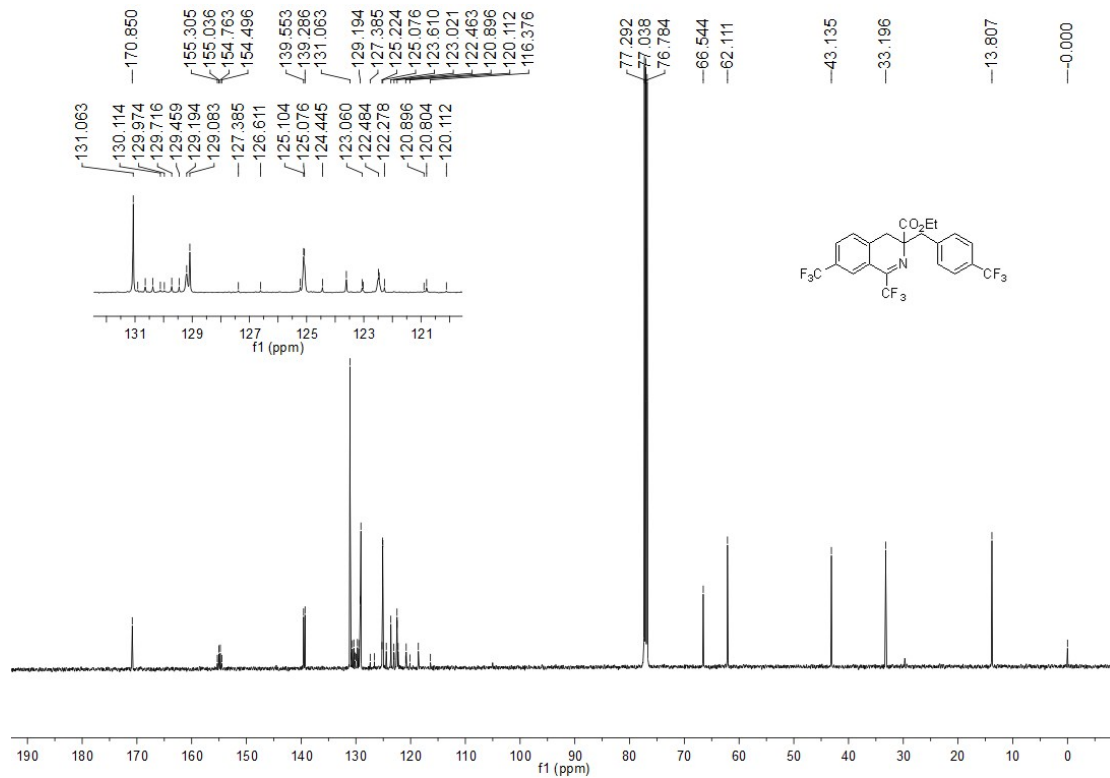

4e

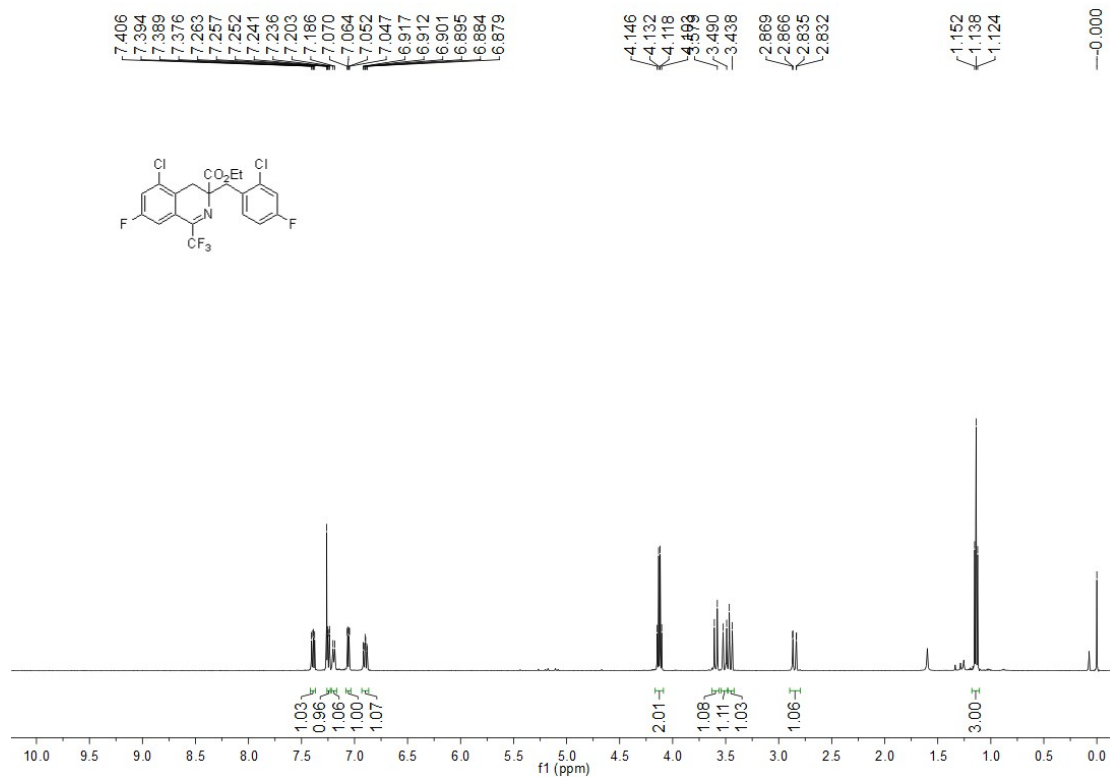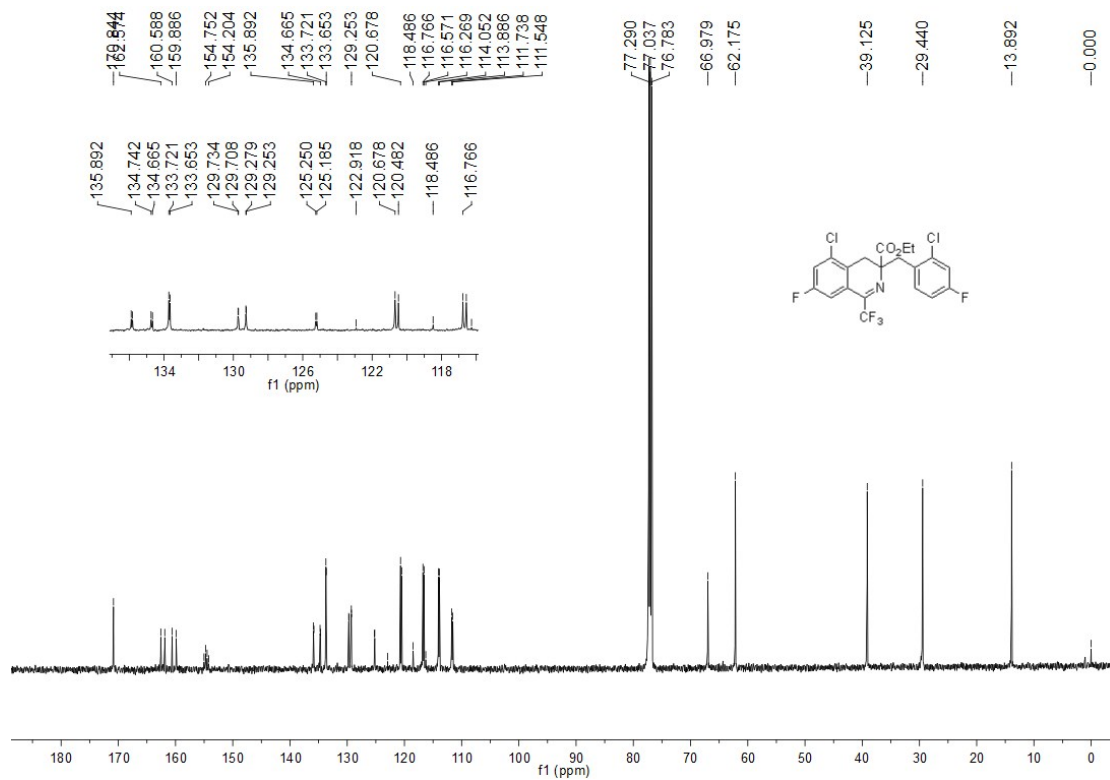



2a

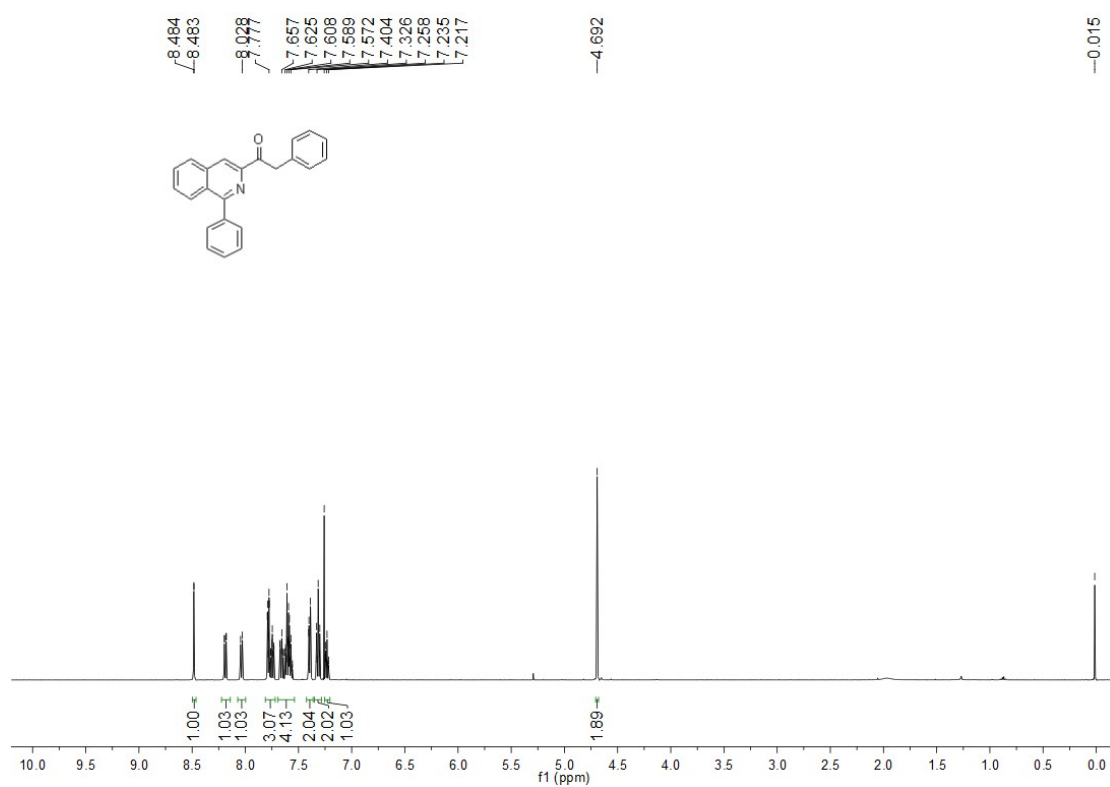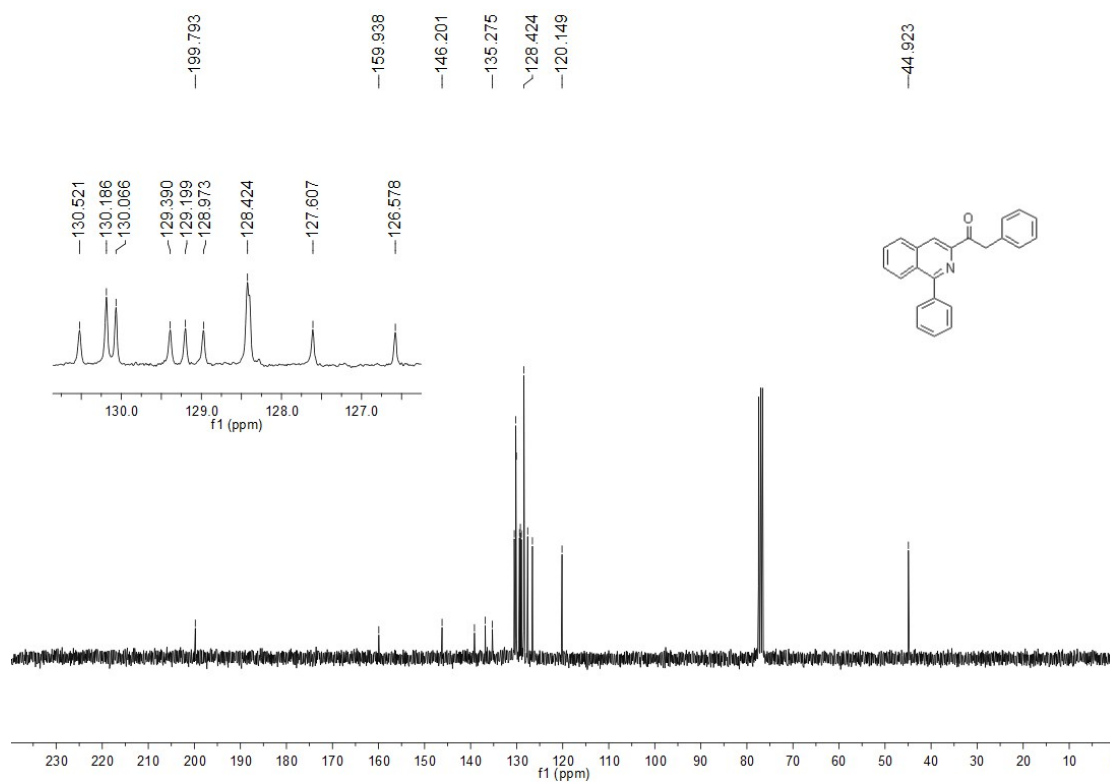

2b

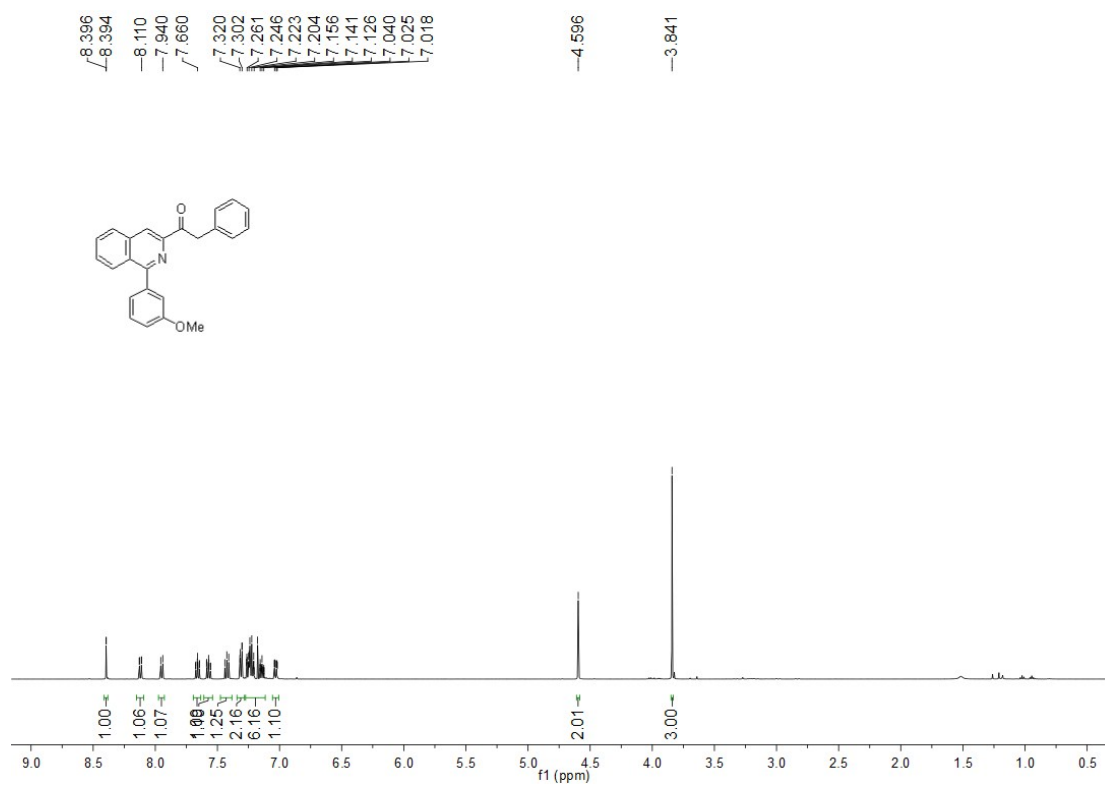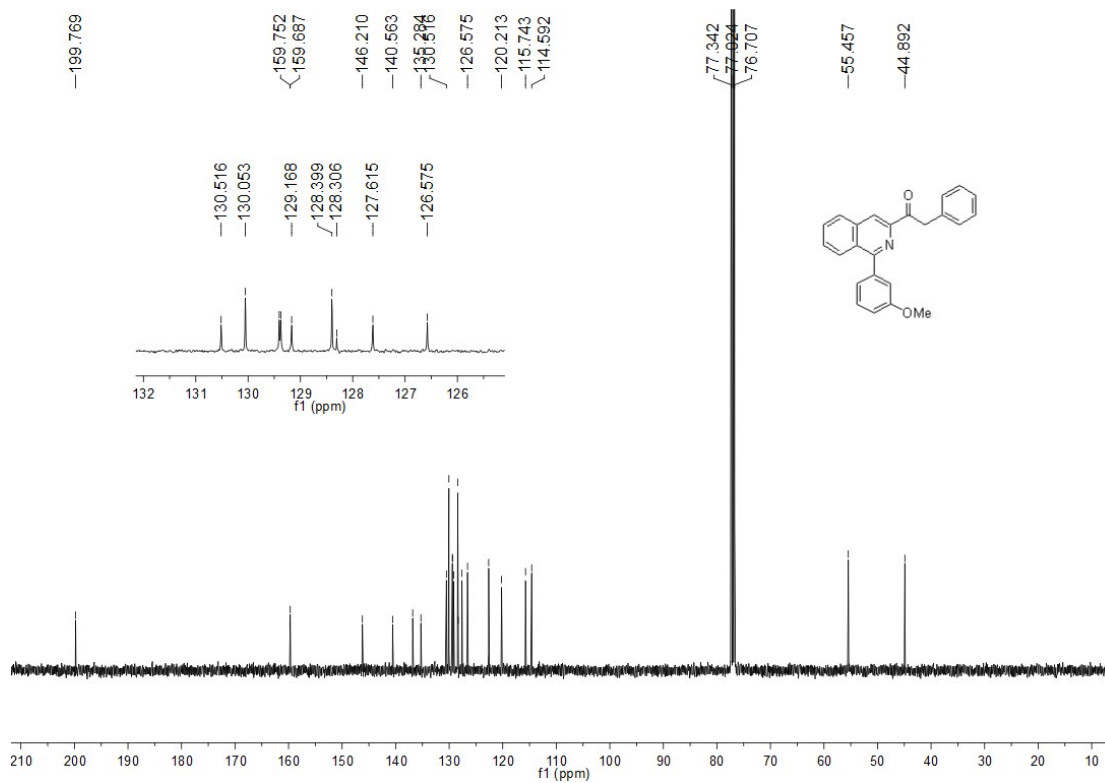

2c

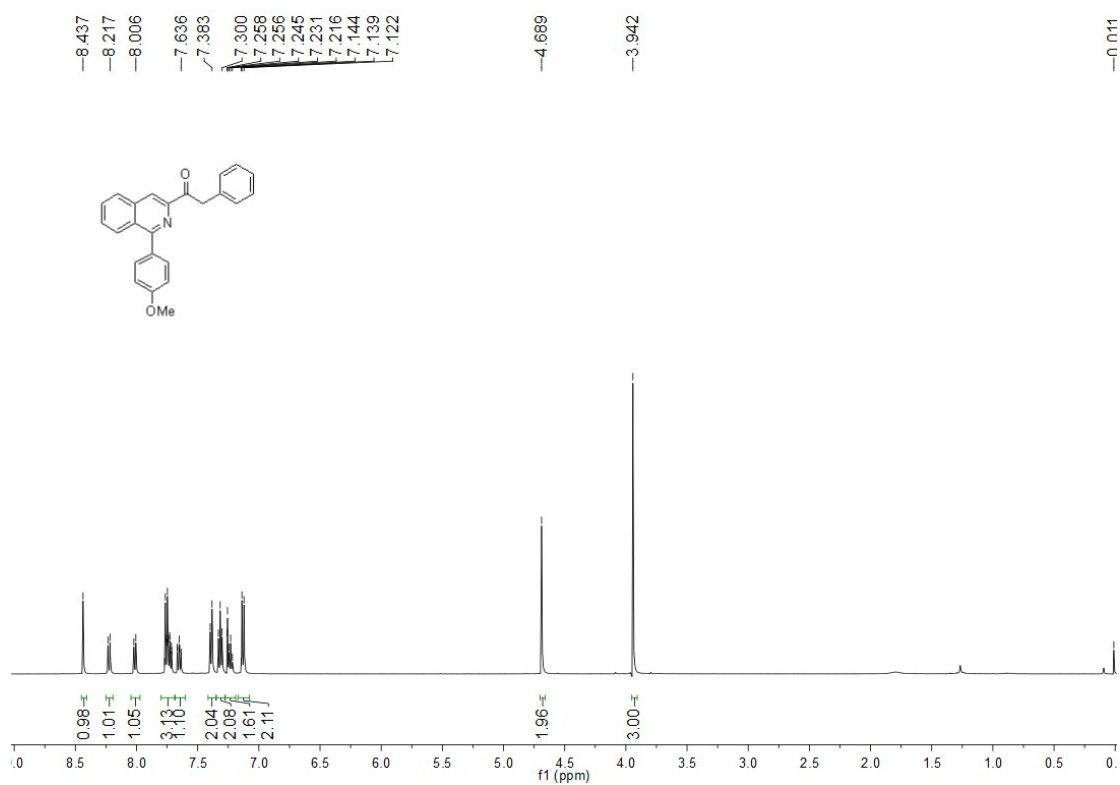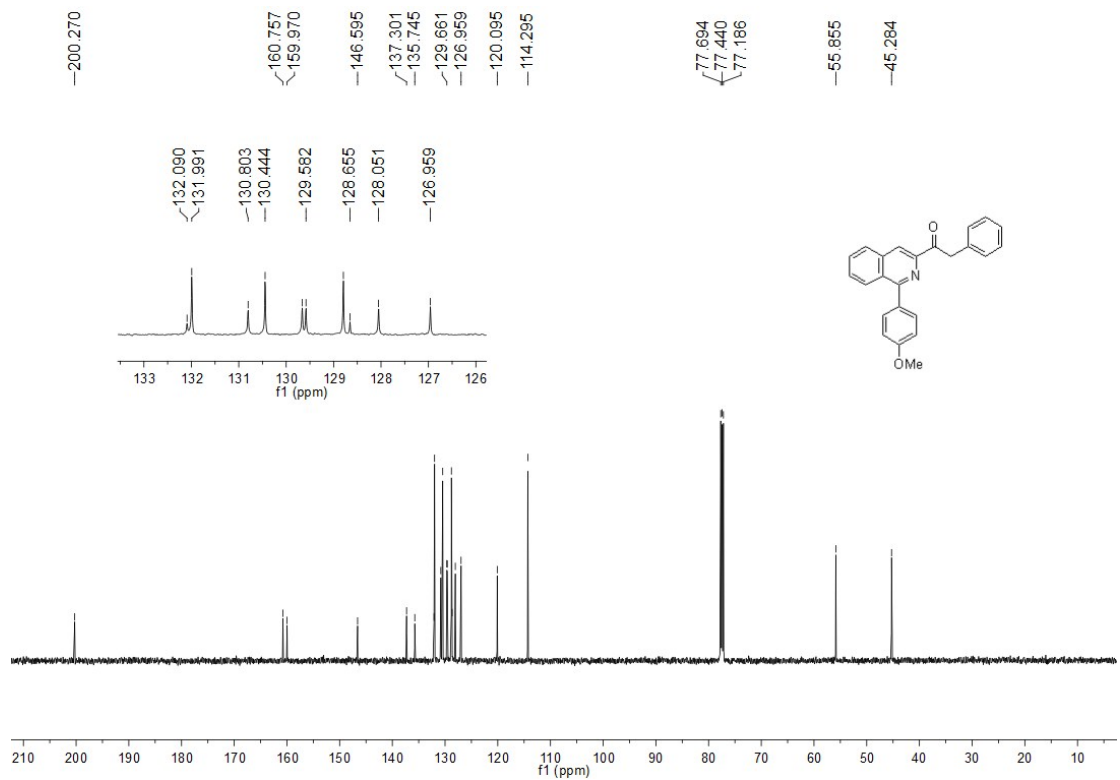

2d

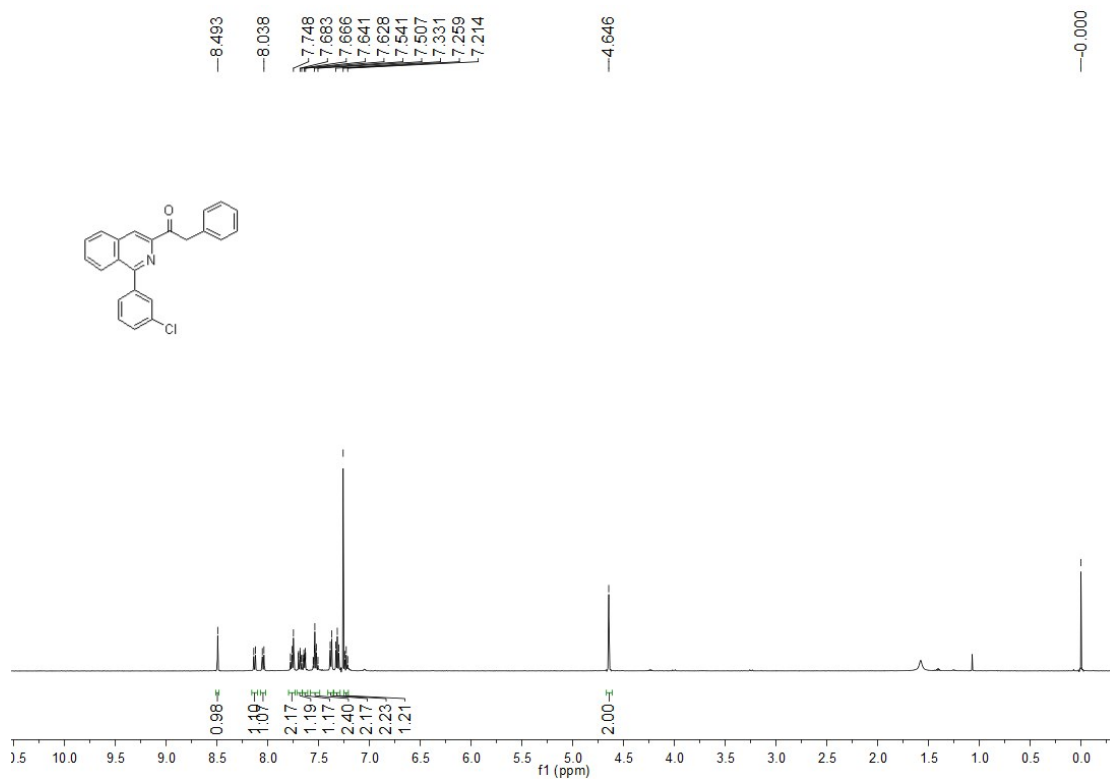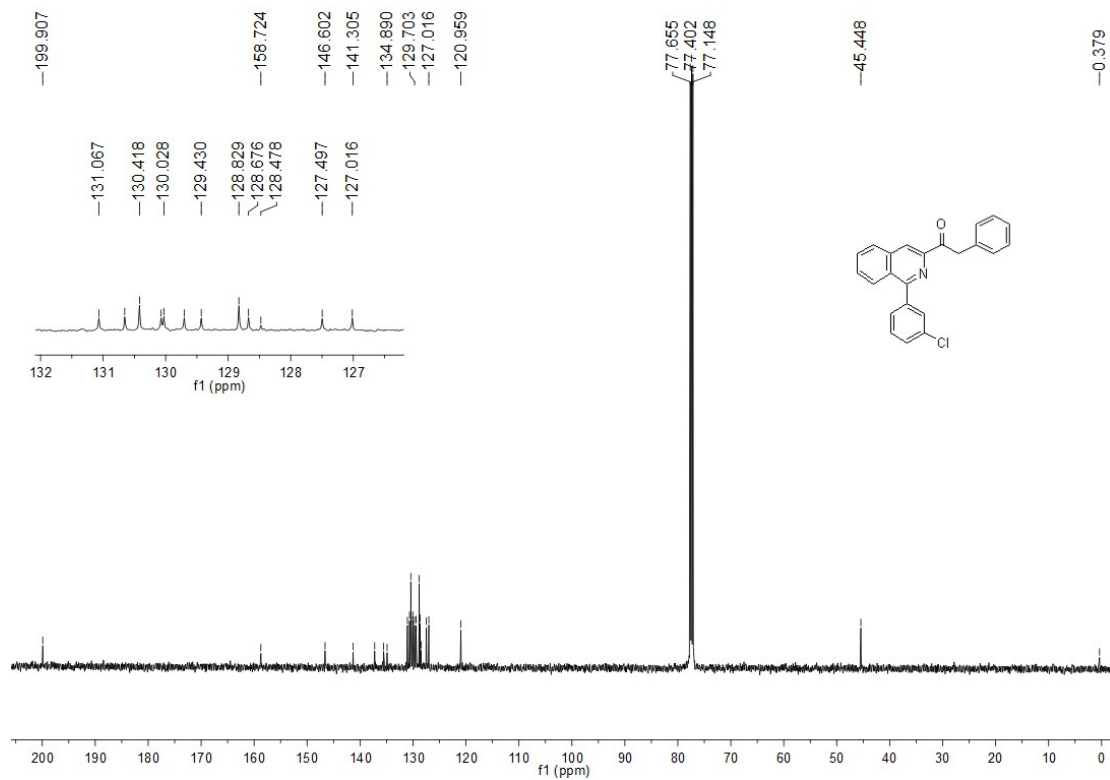

2e

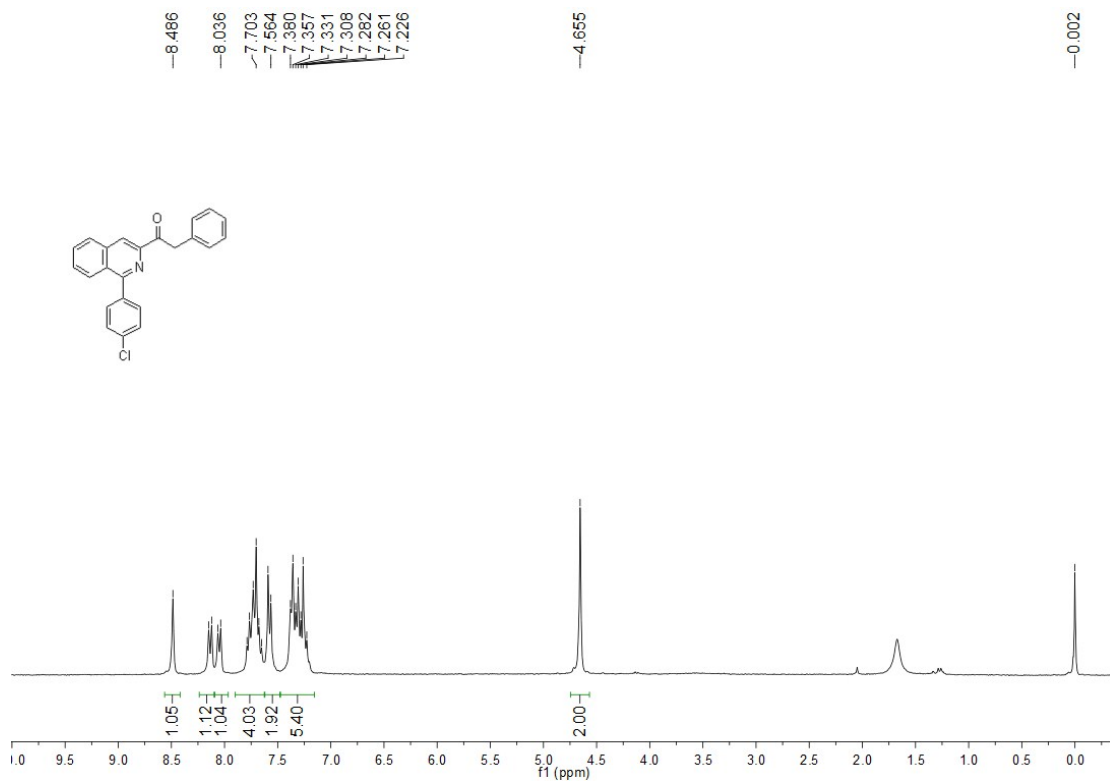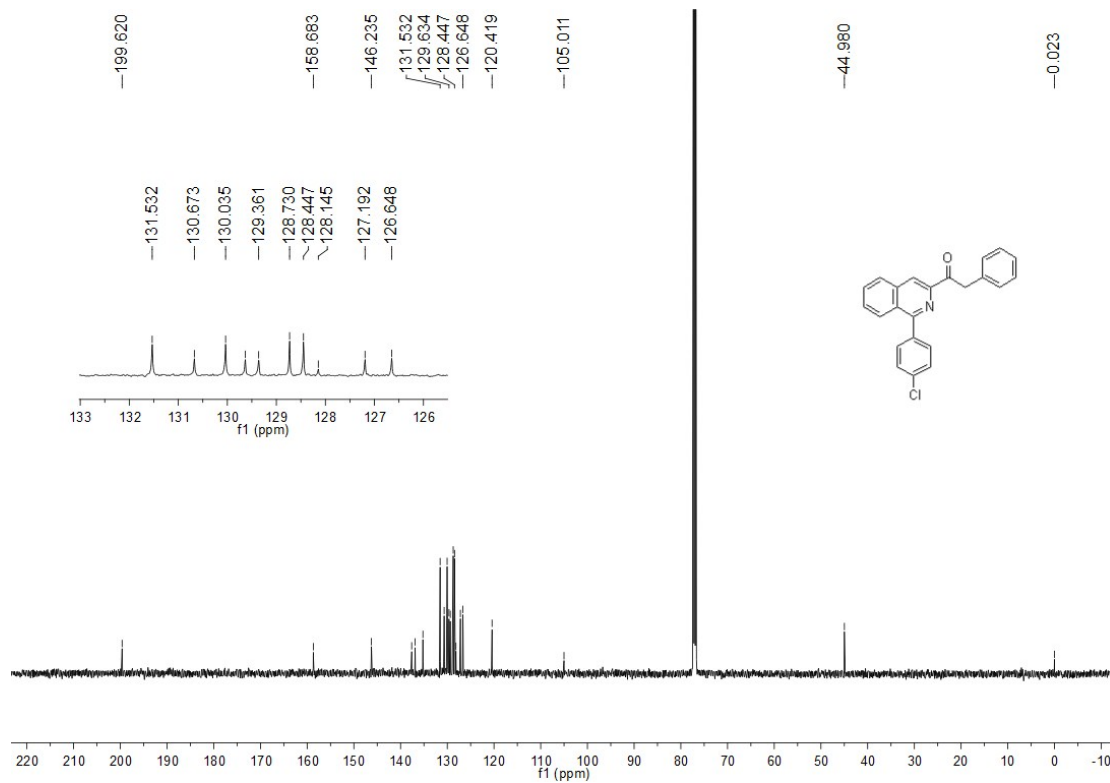

2f

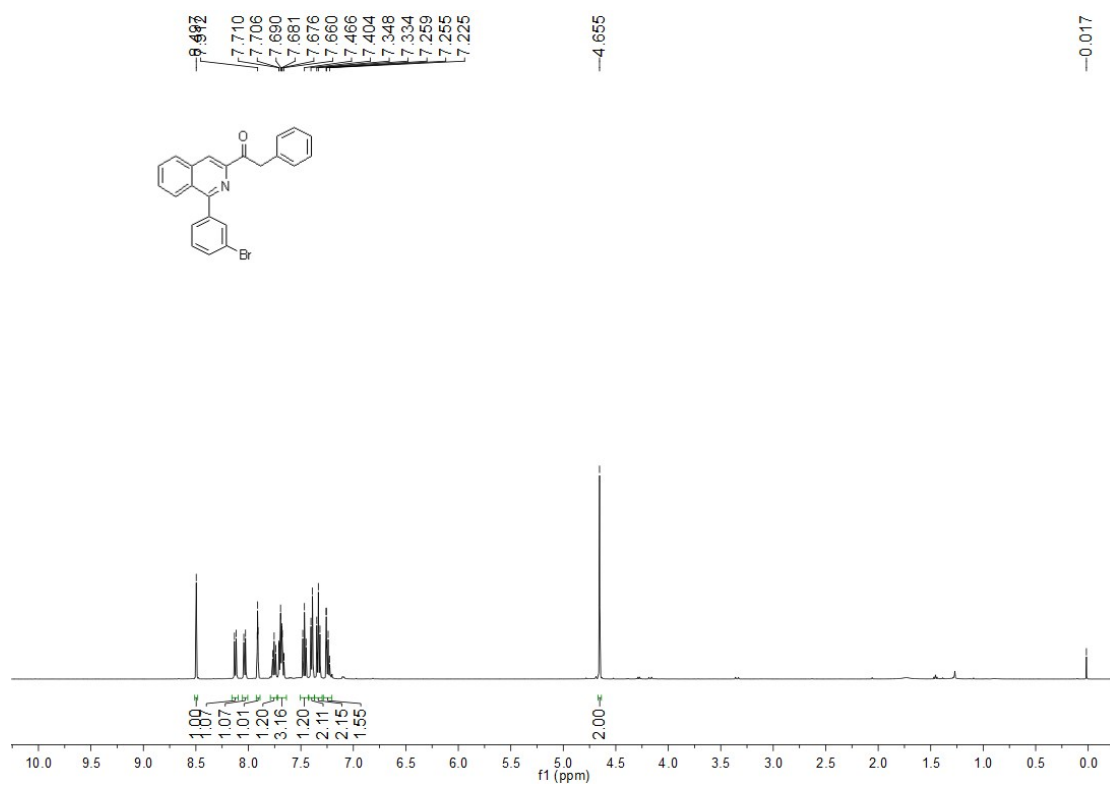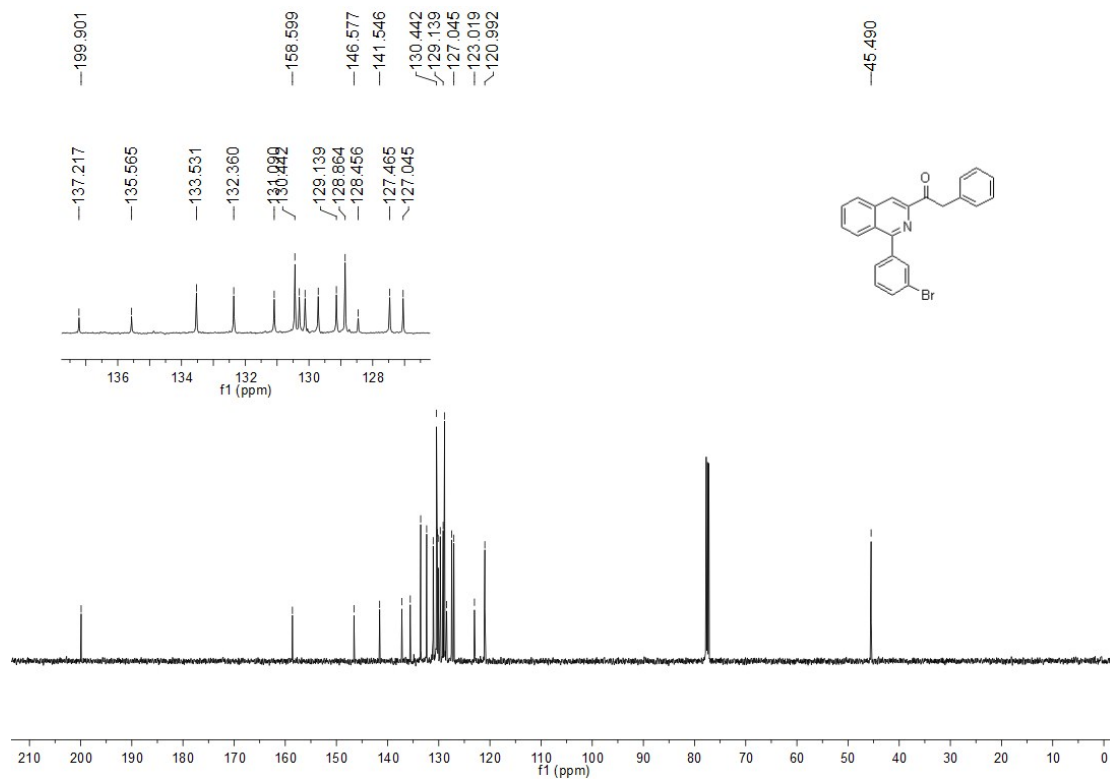

2g

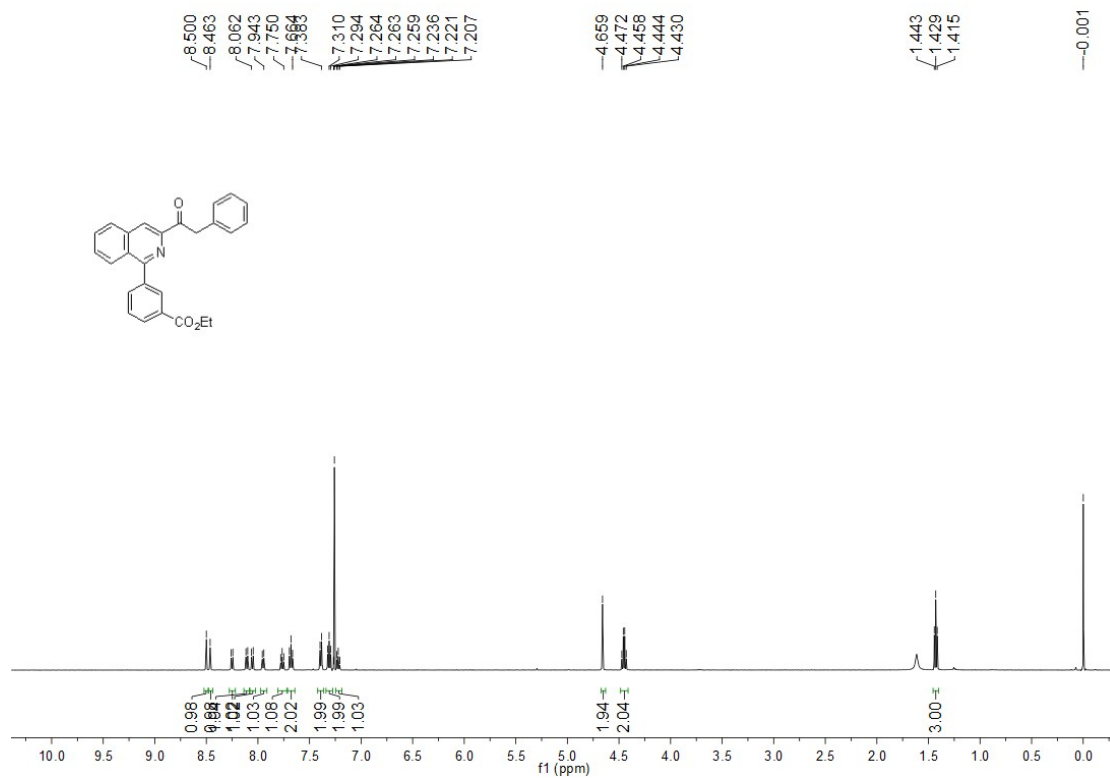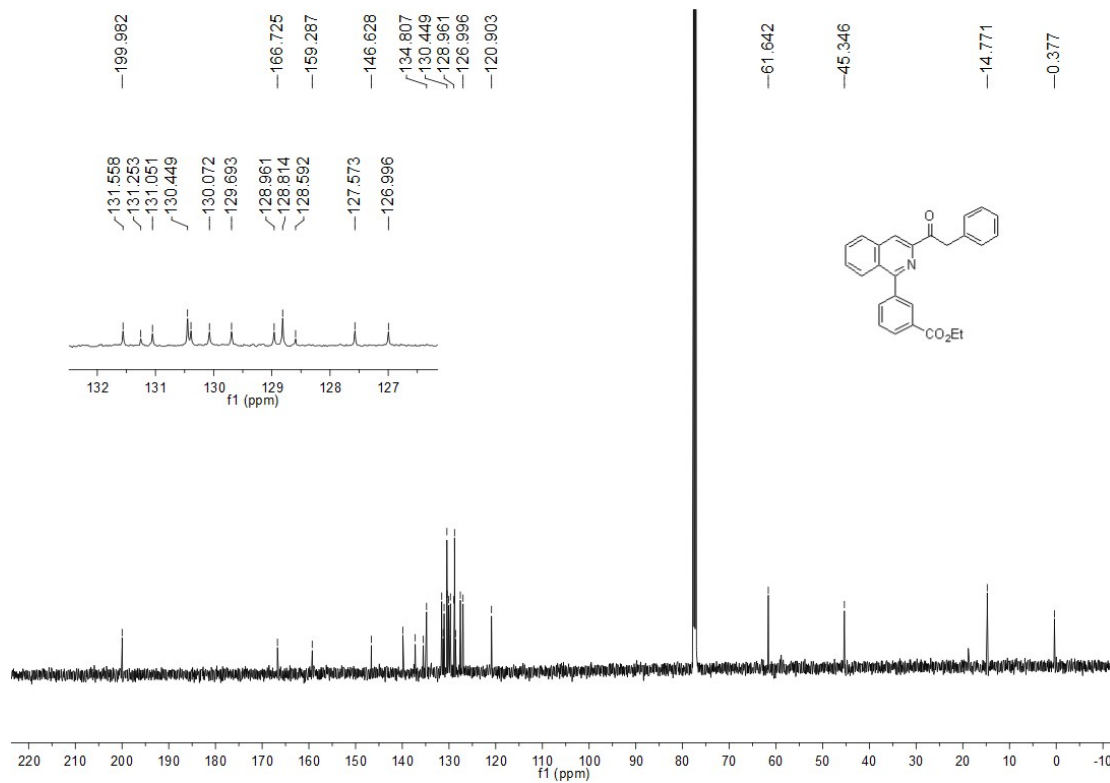

2h

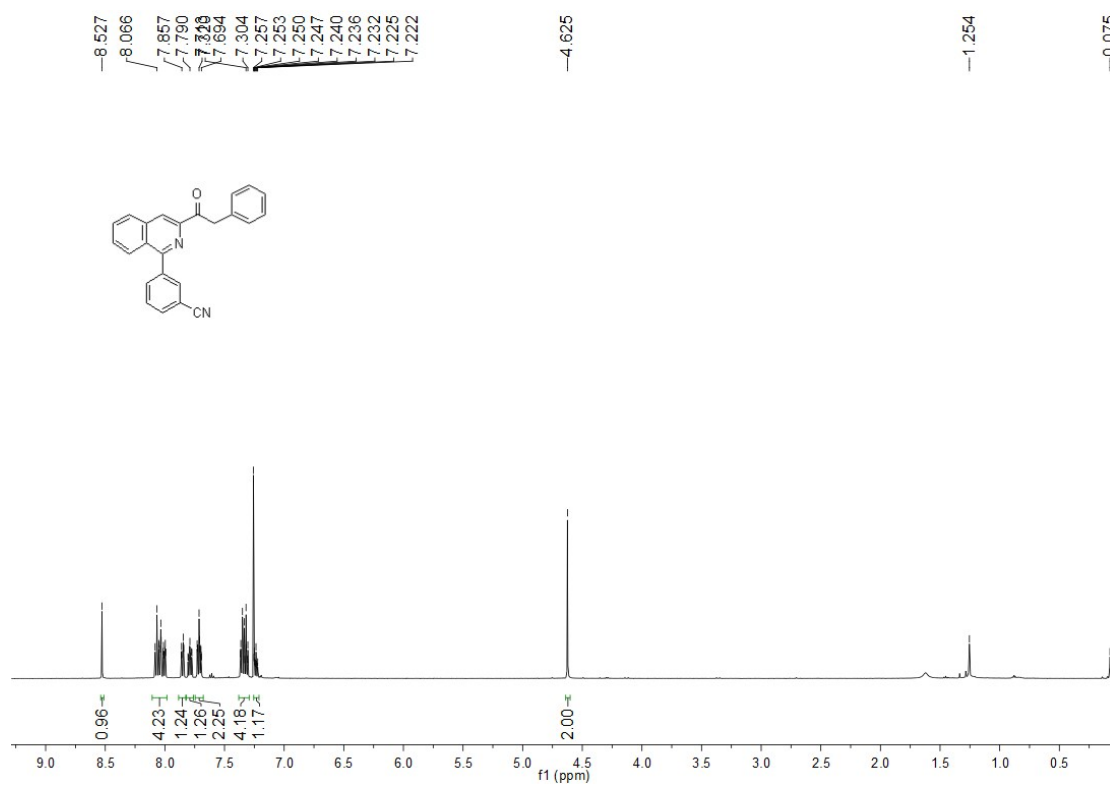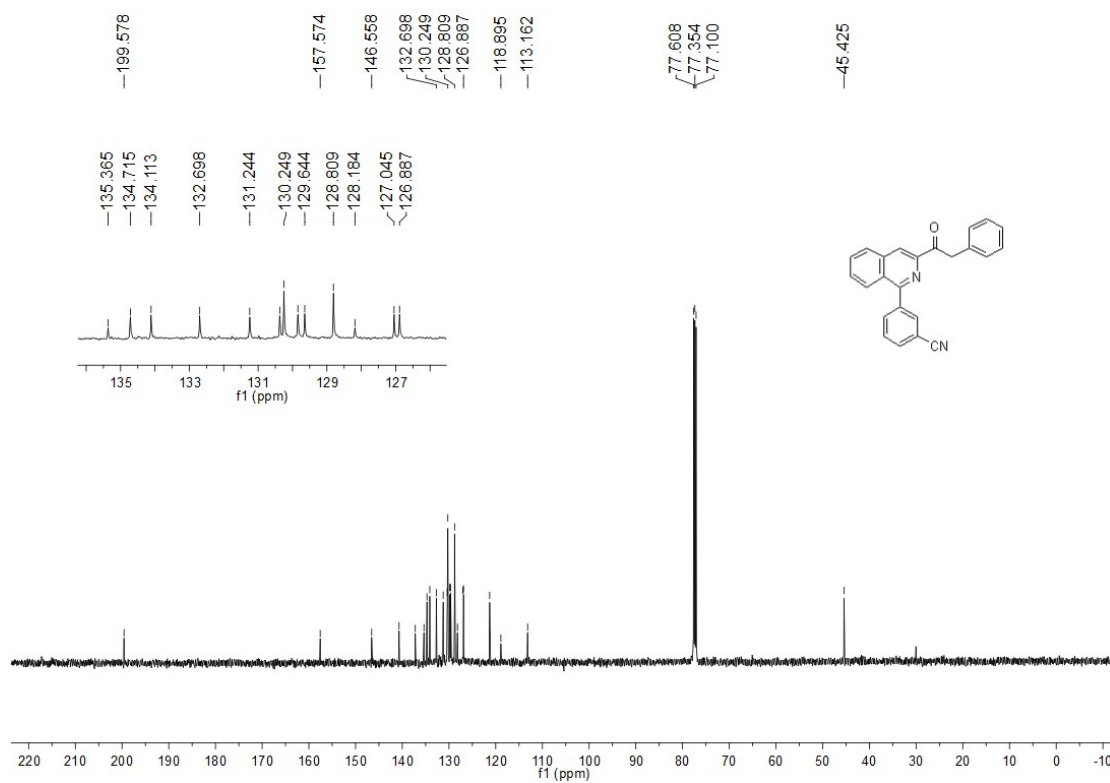



2i

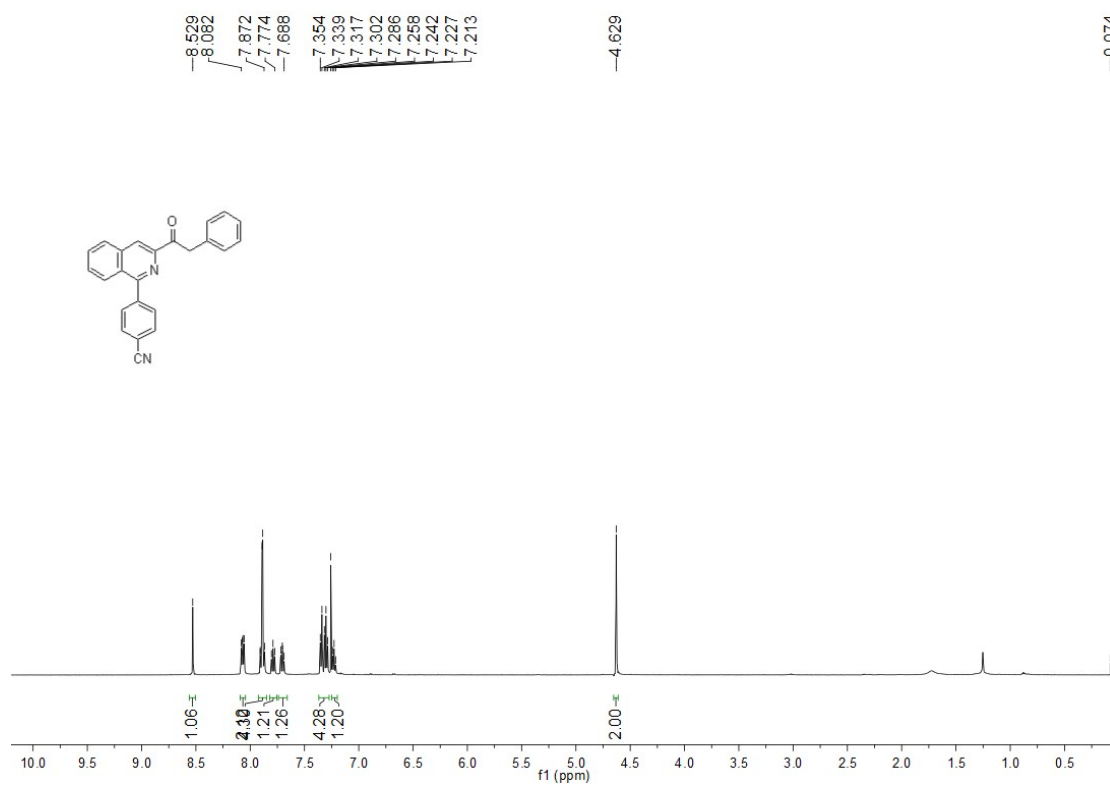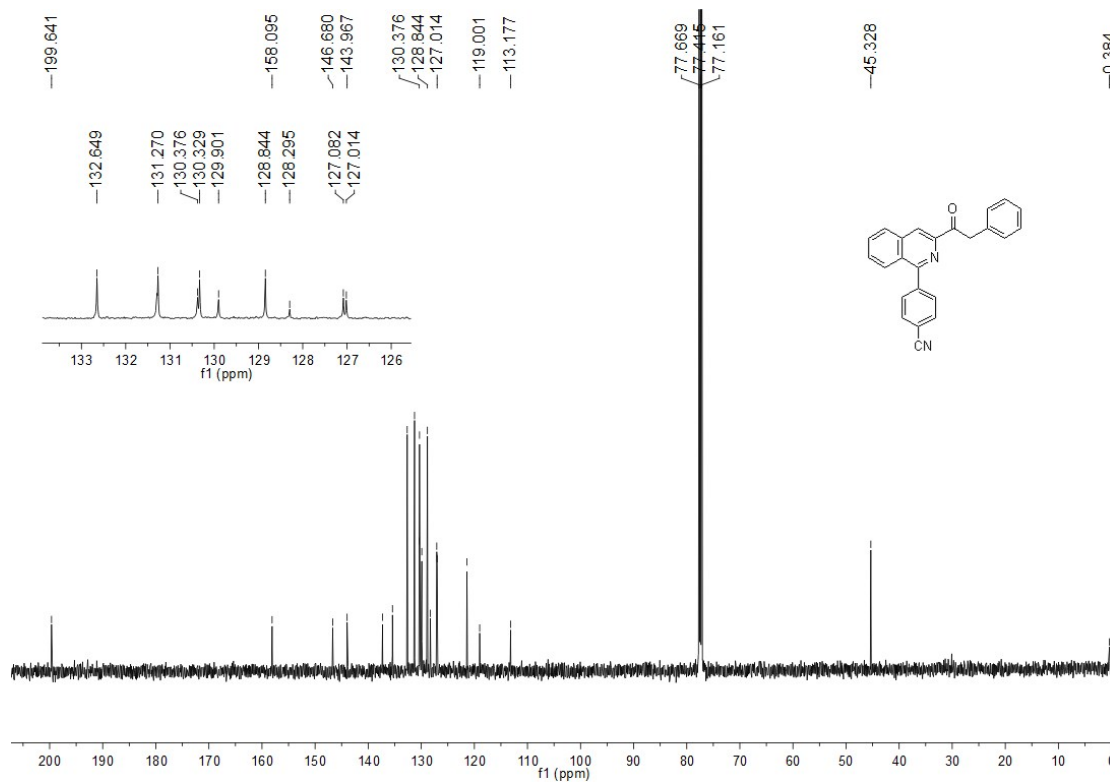

2j

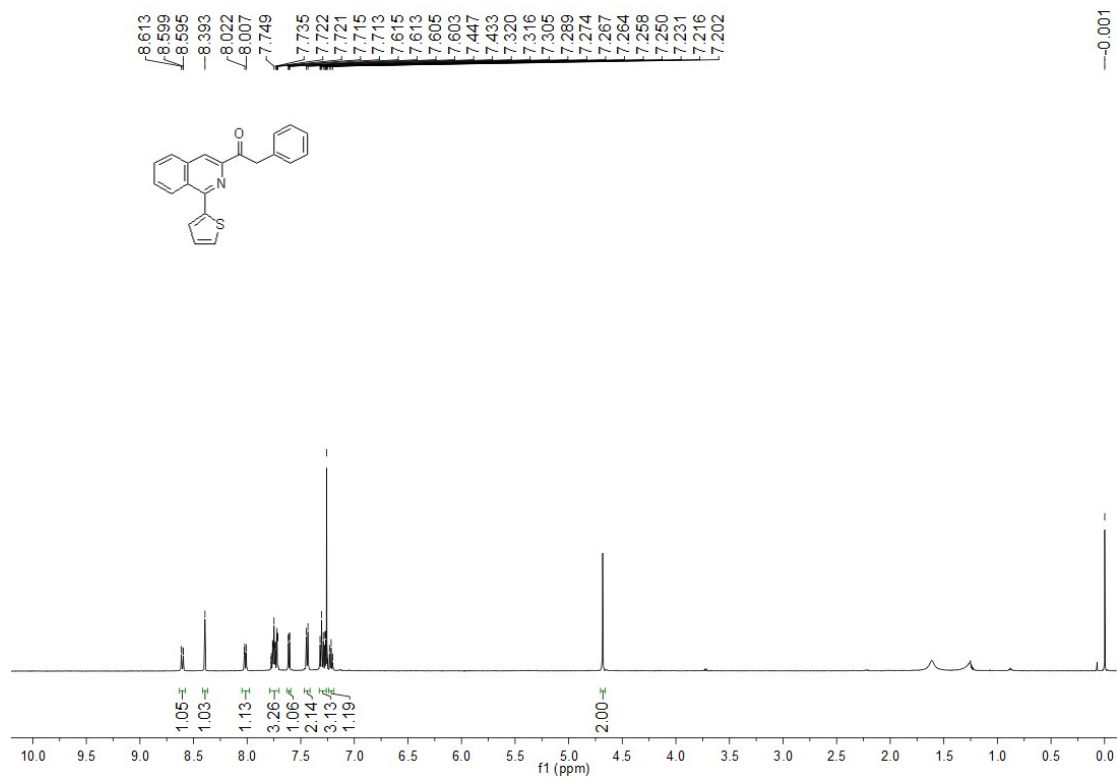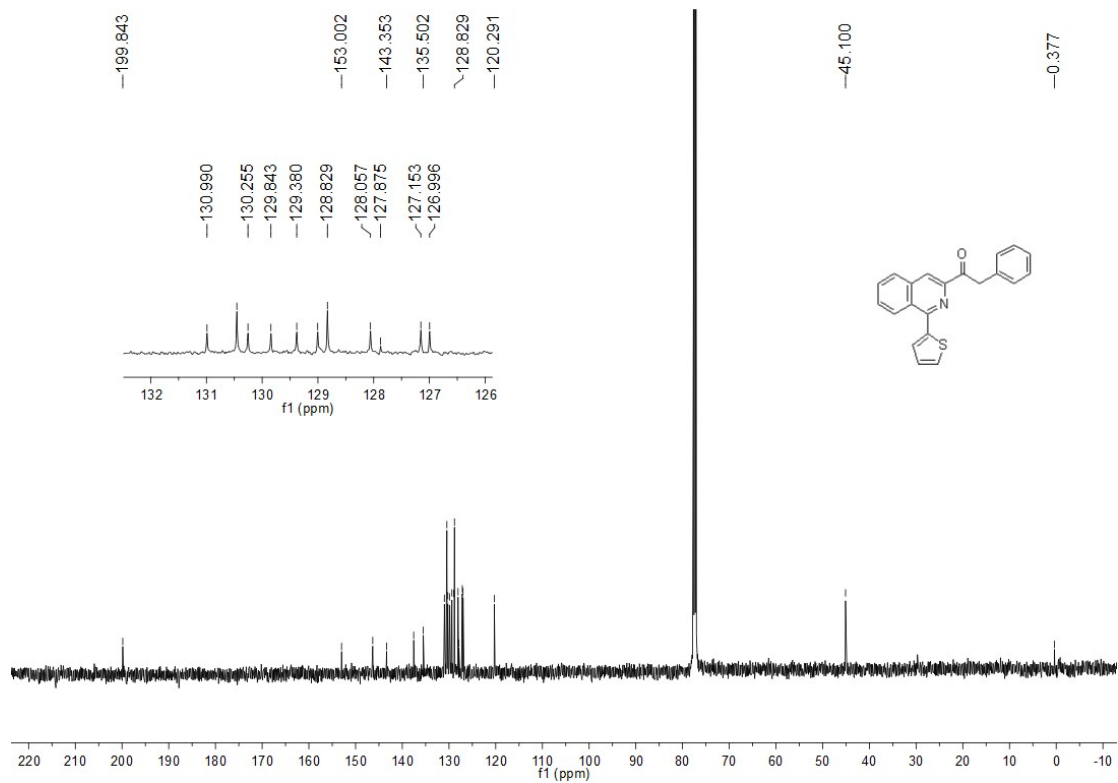

2k

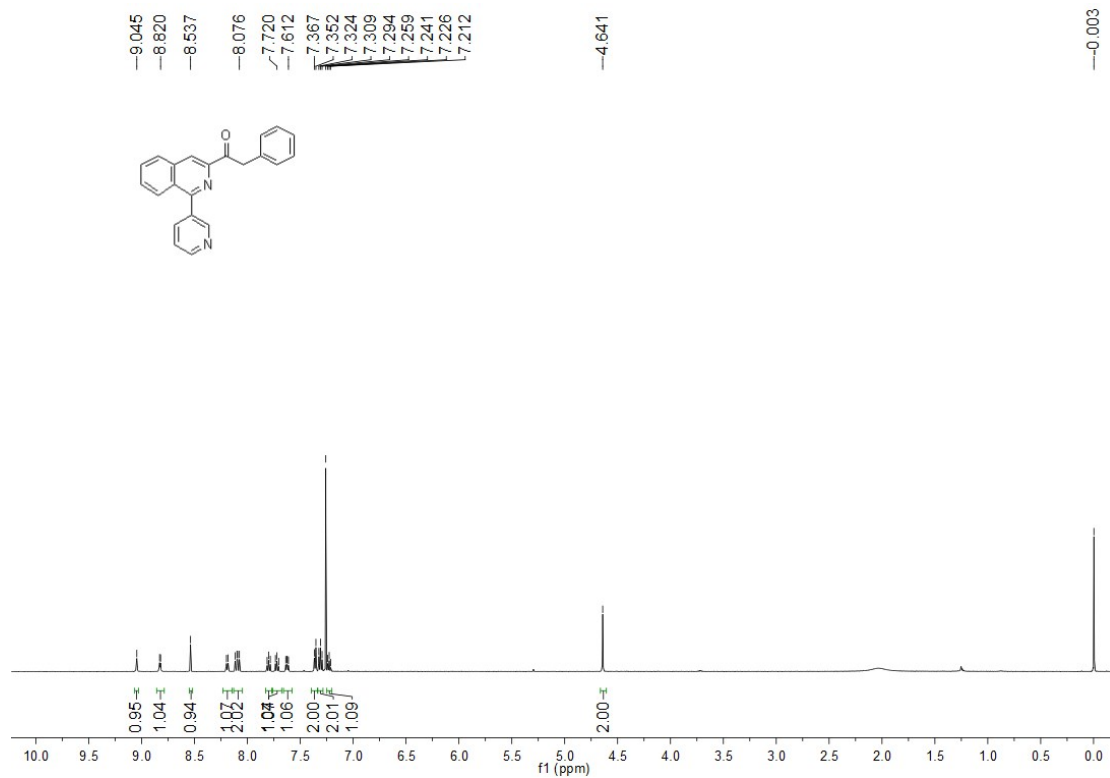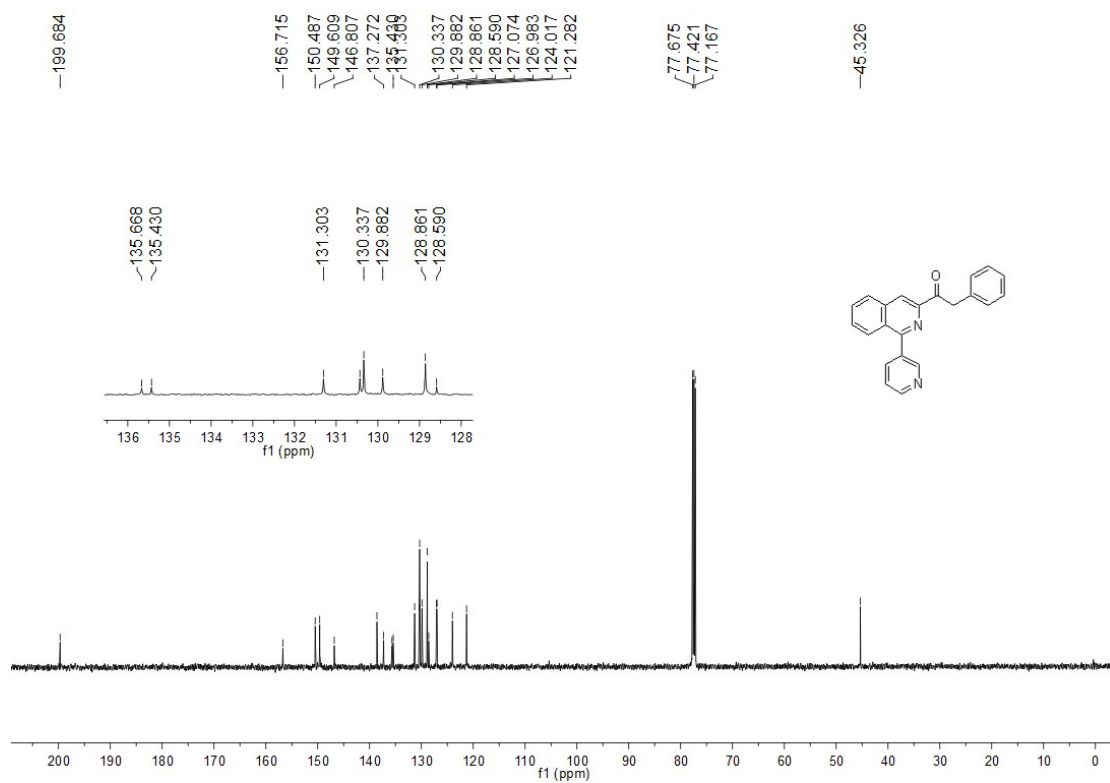

21

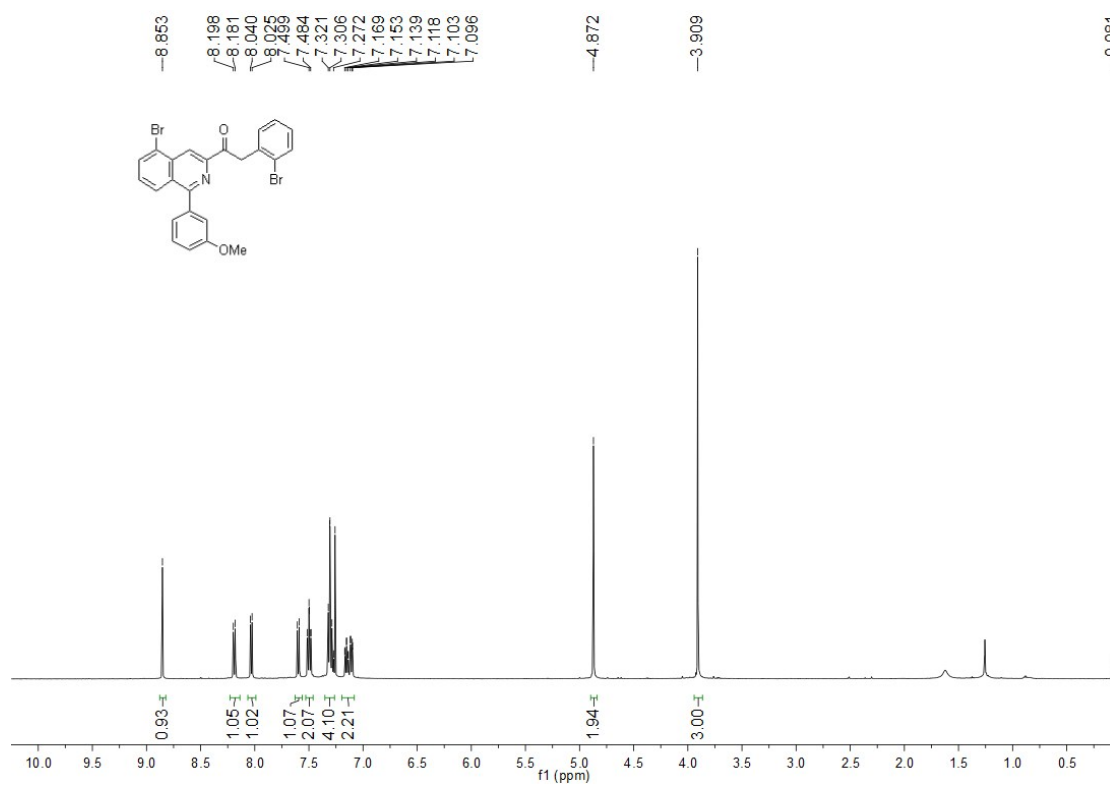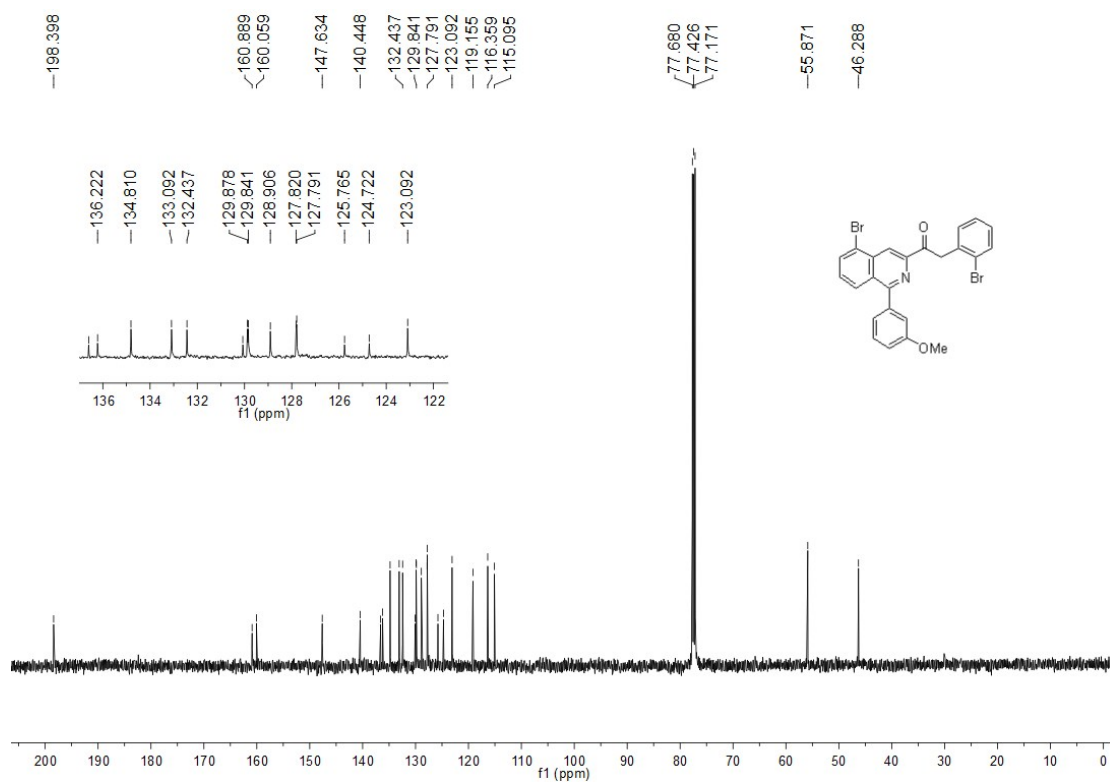

2m

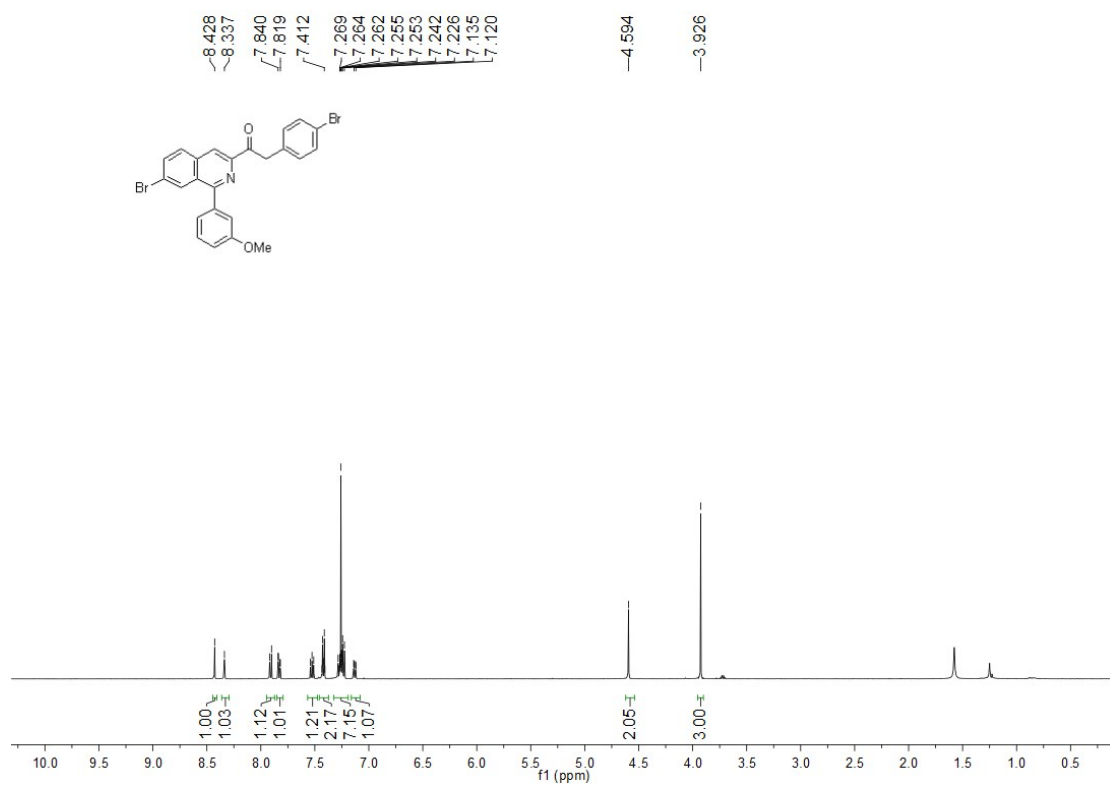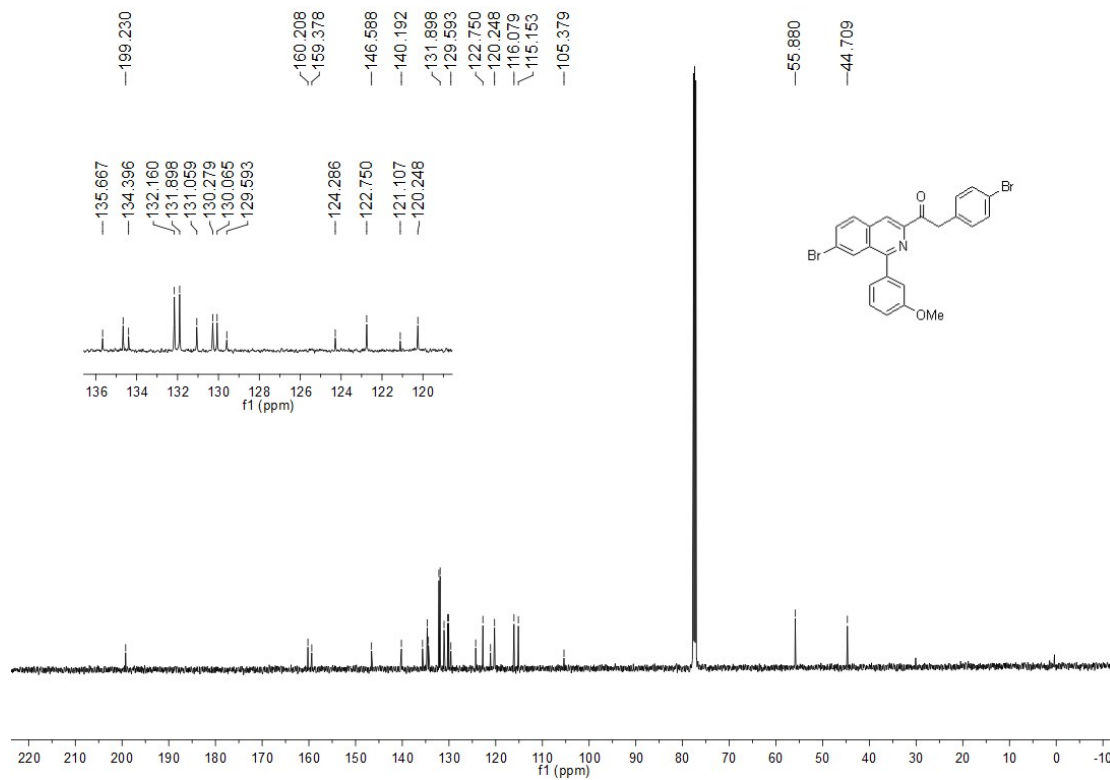

2n

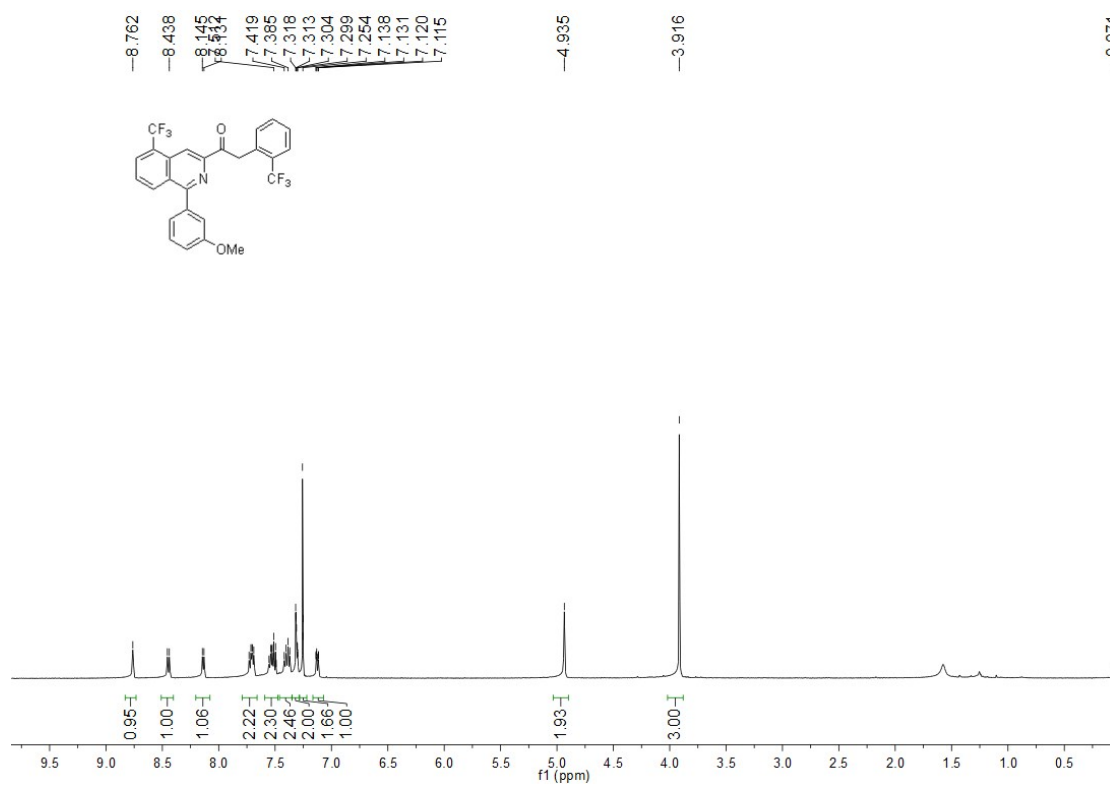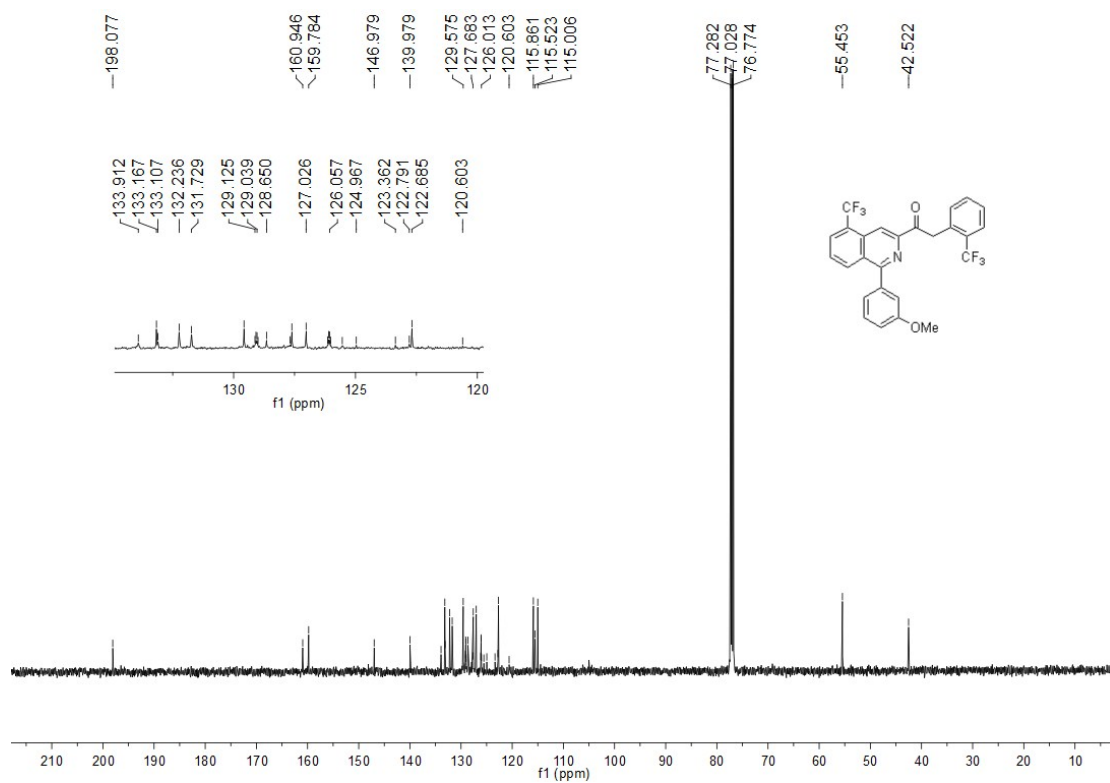

2o

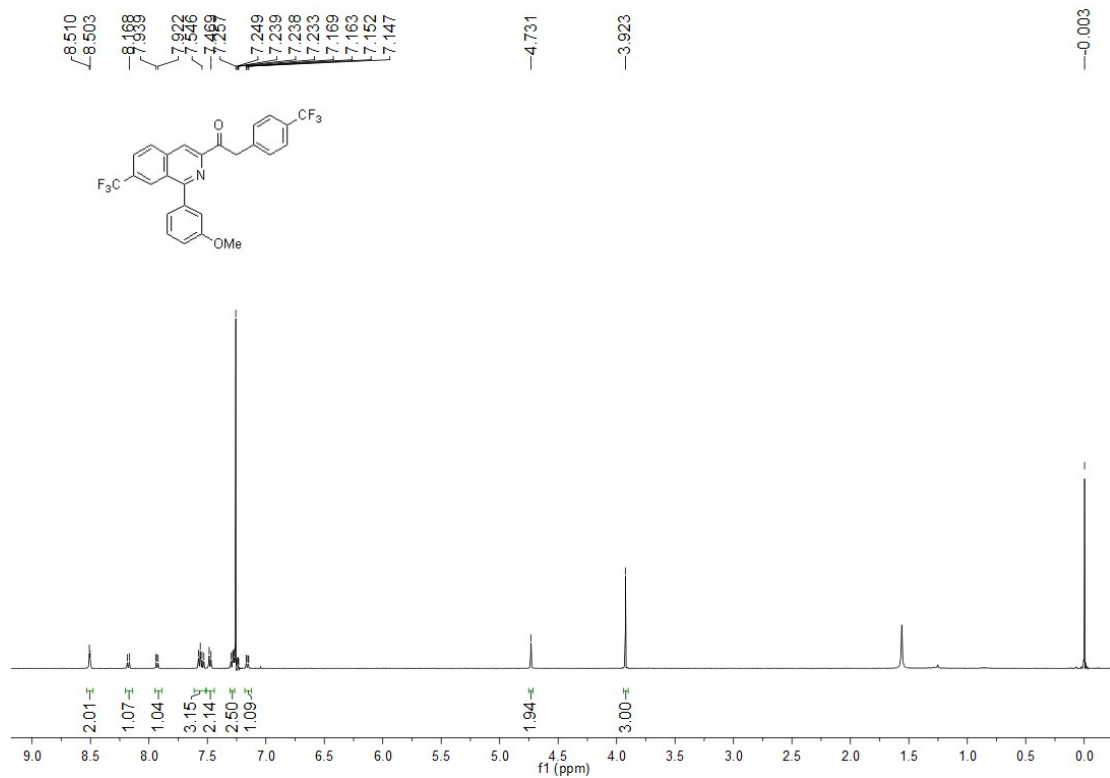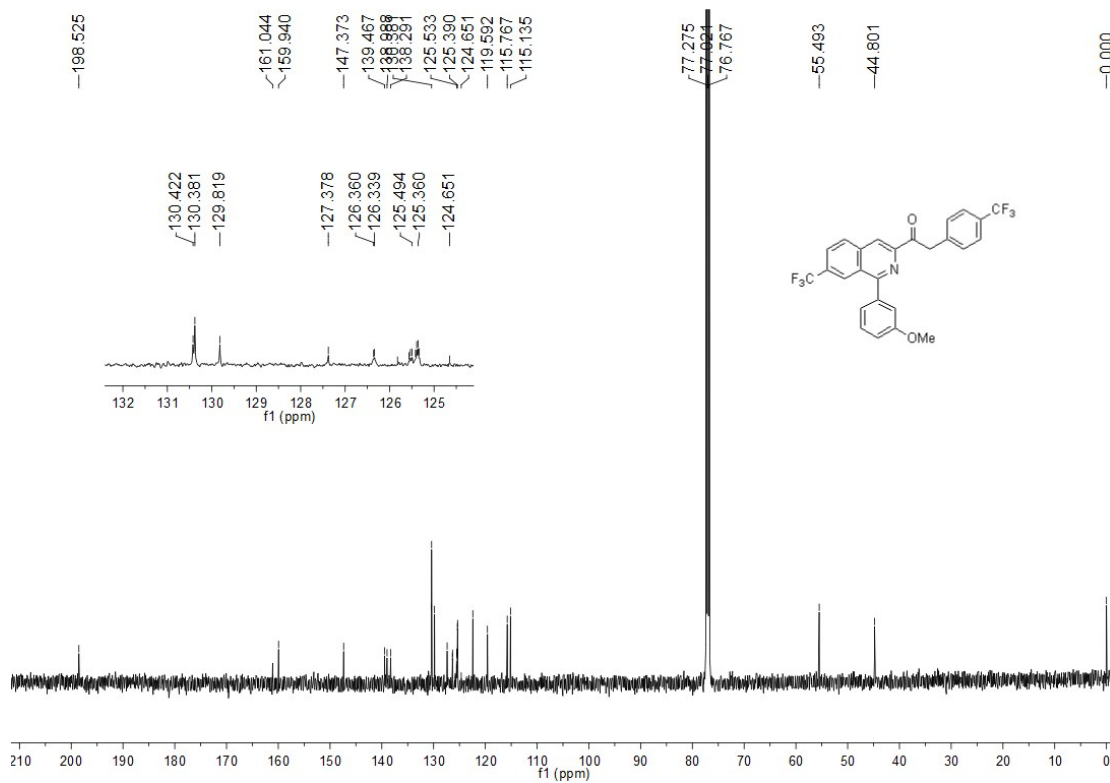

2p

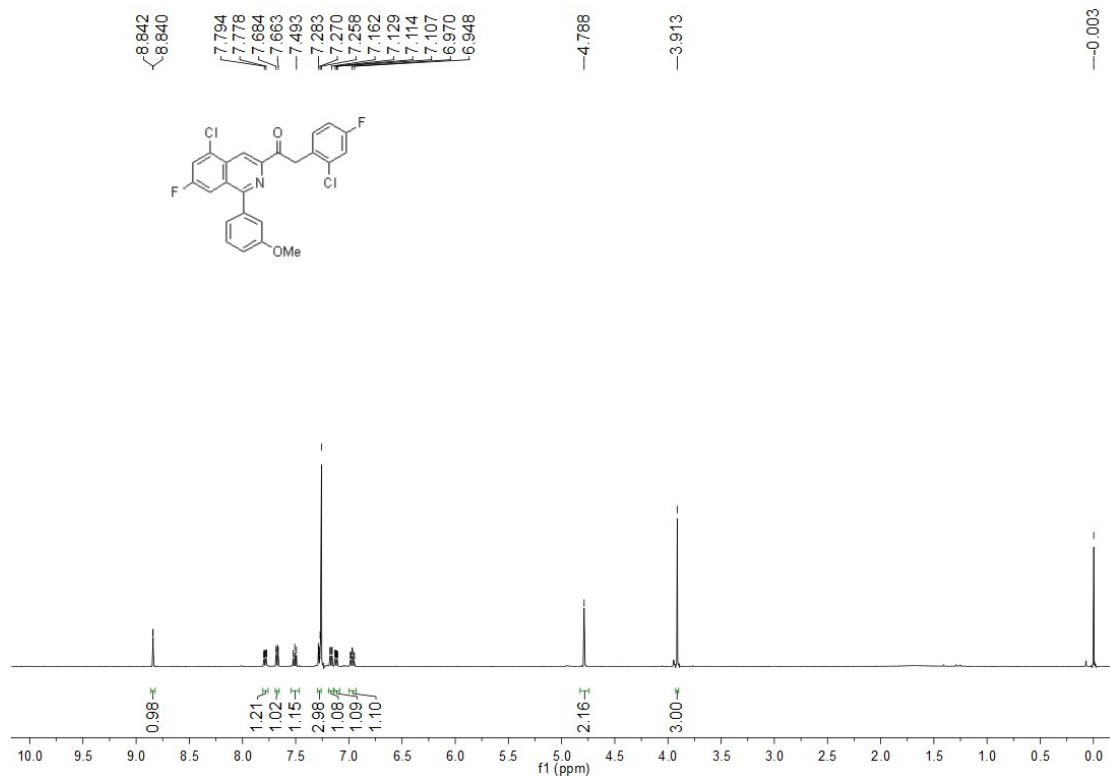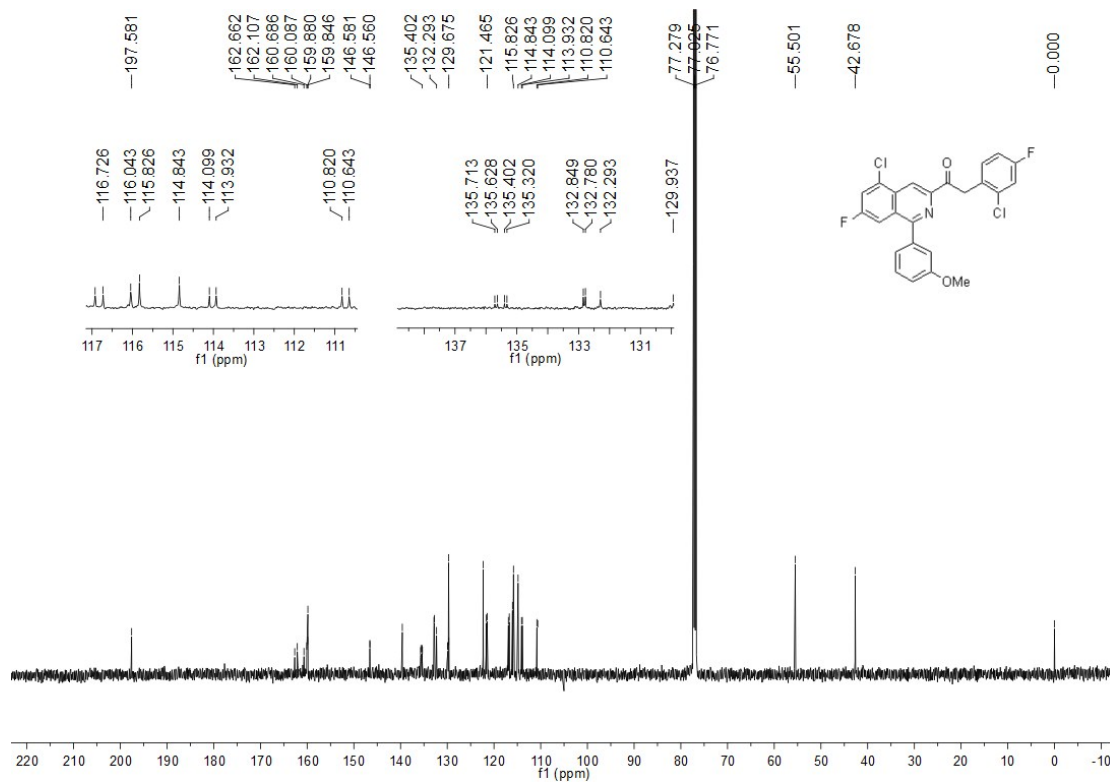



2q

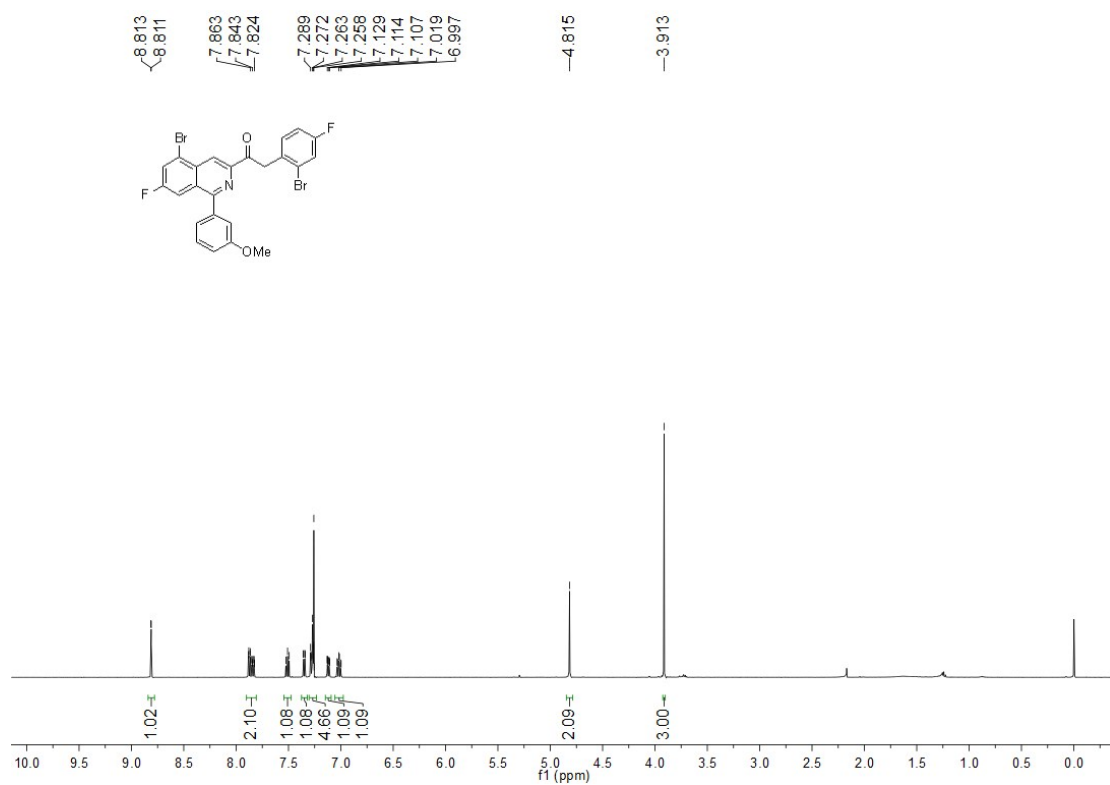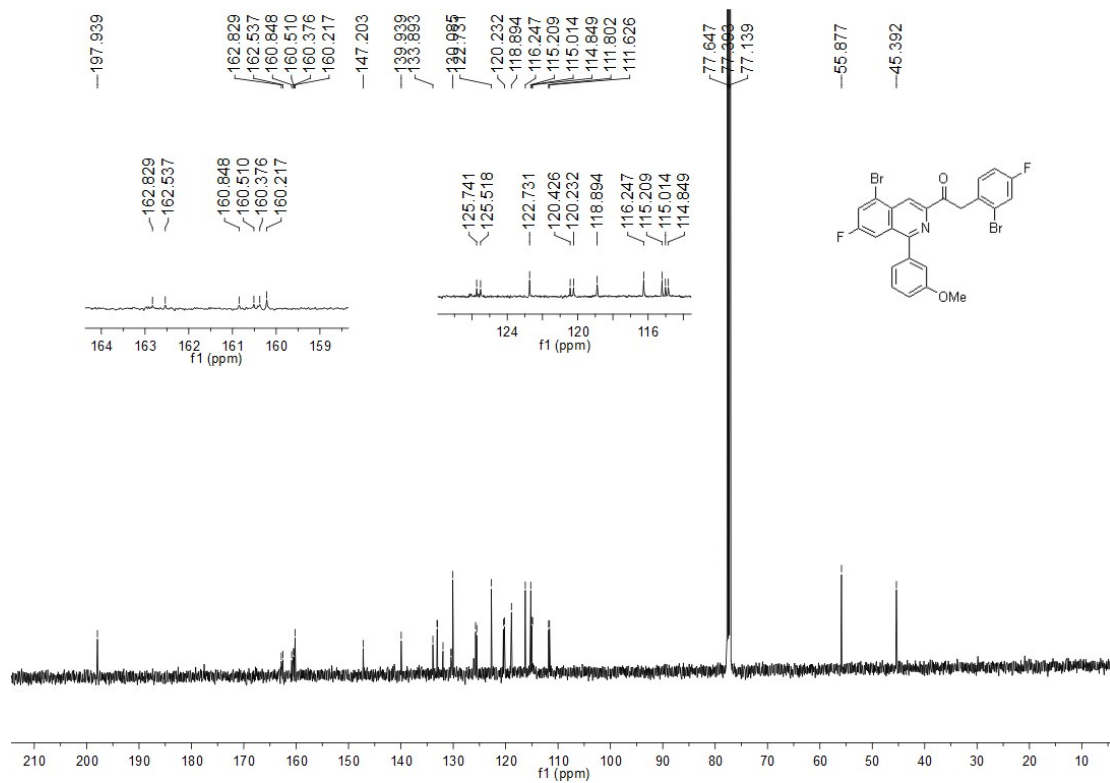

2r

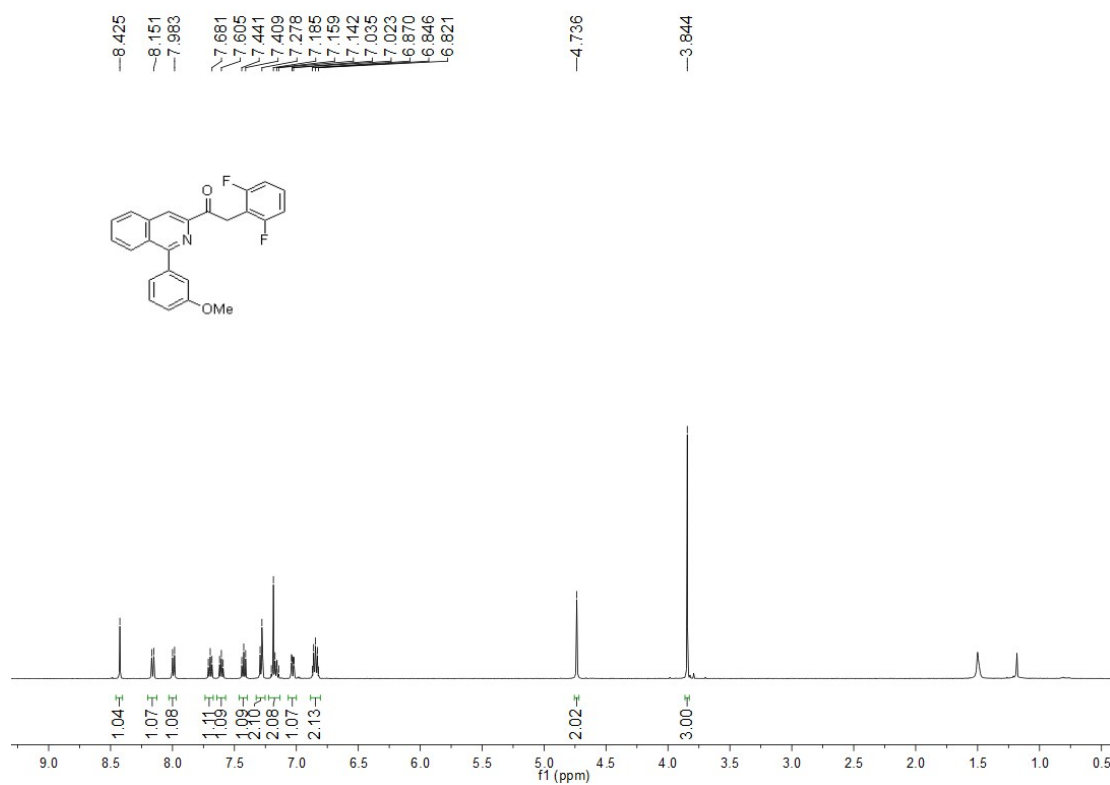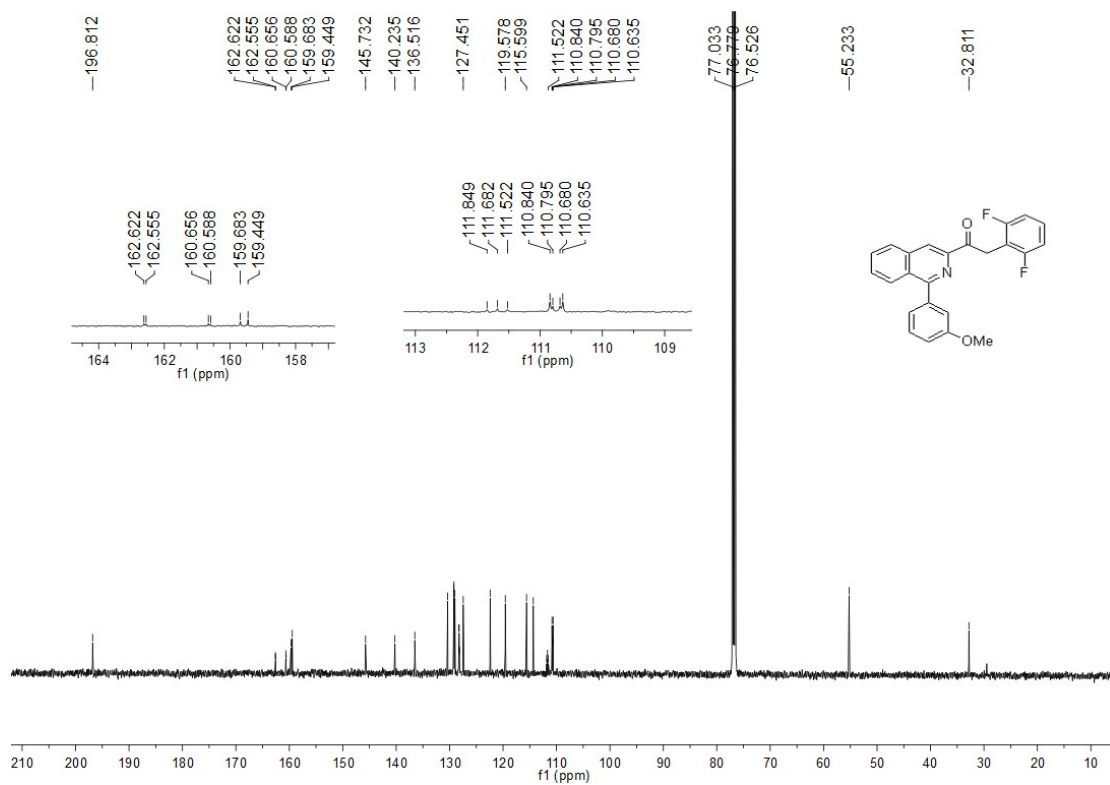

2s

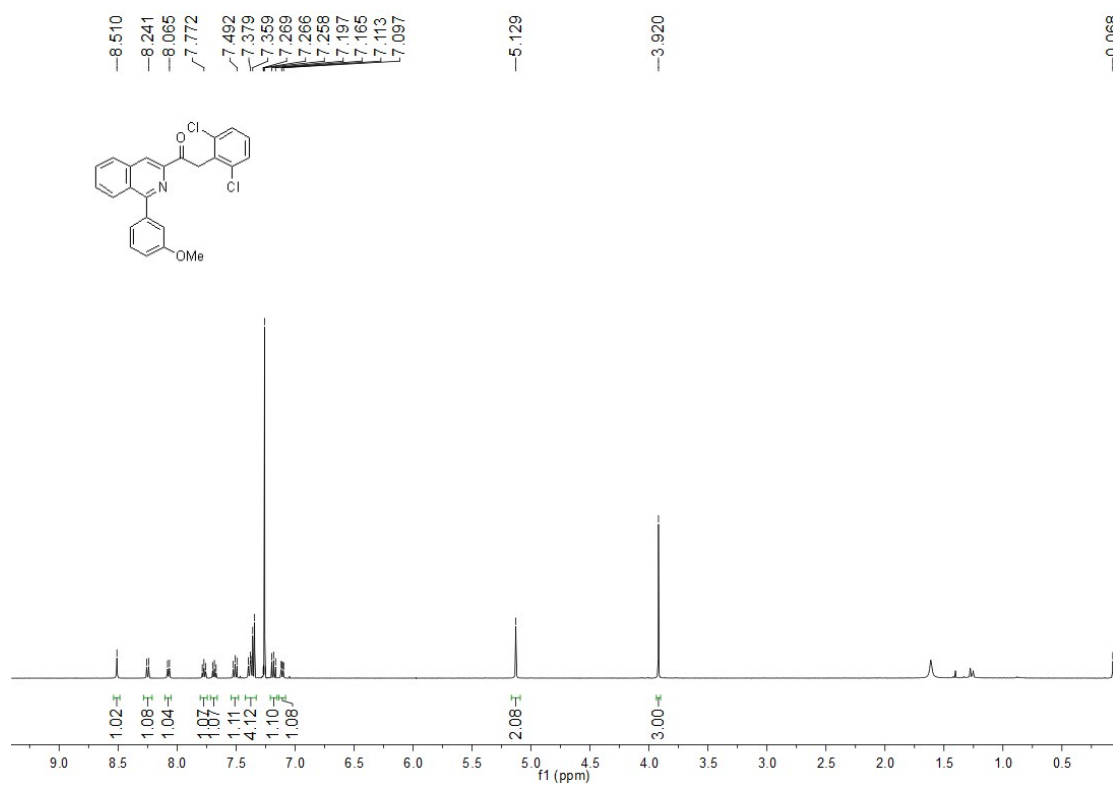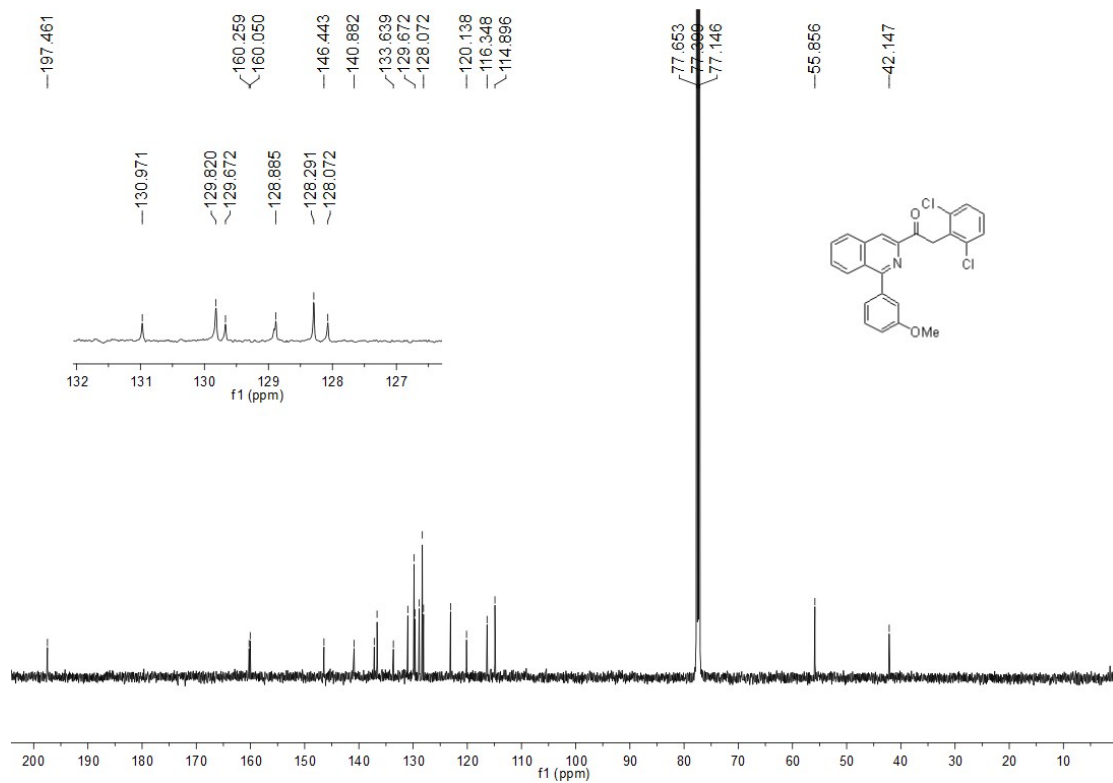

2t

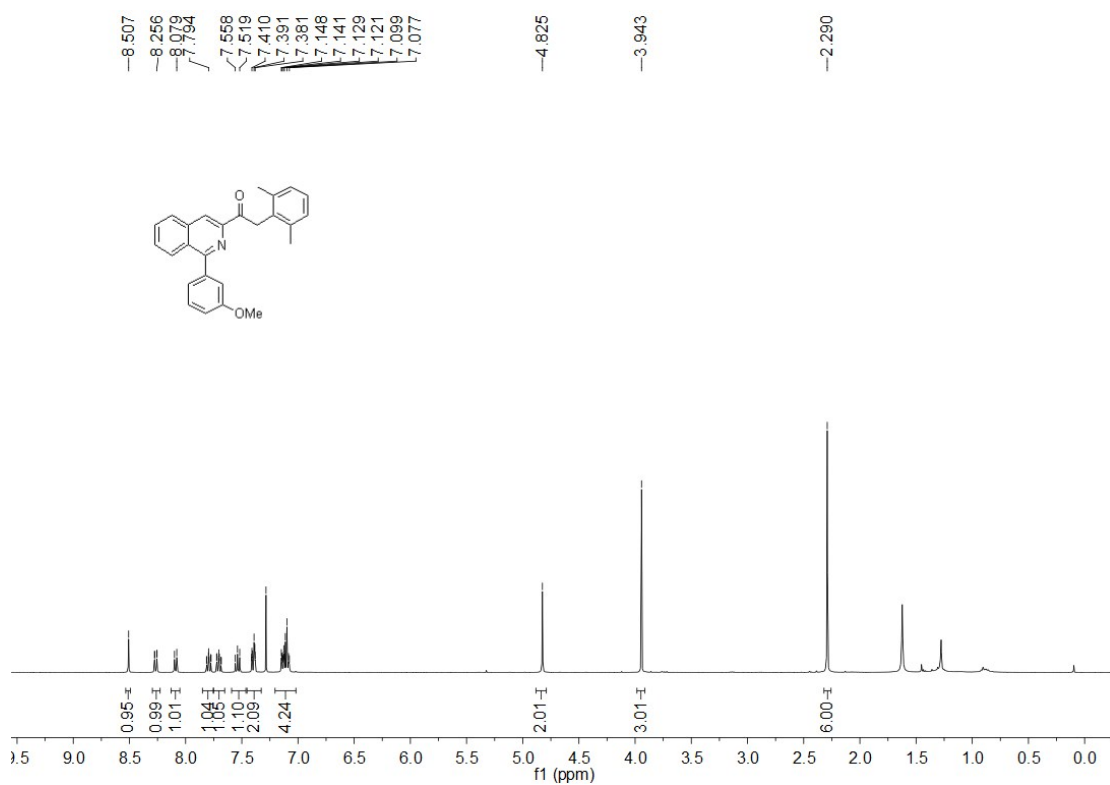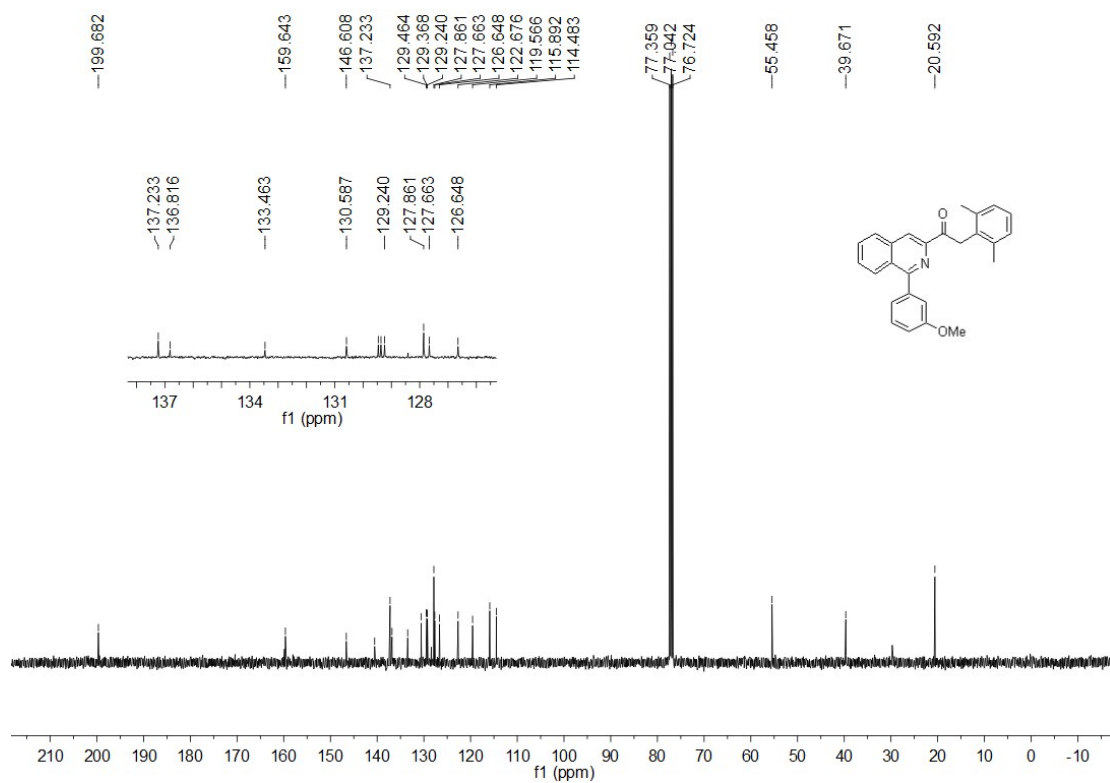

2u

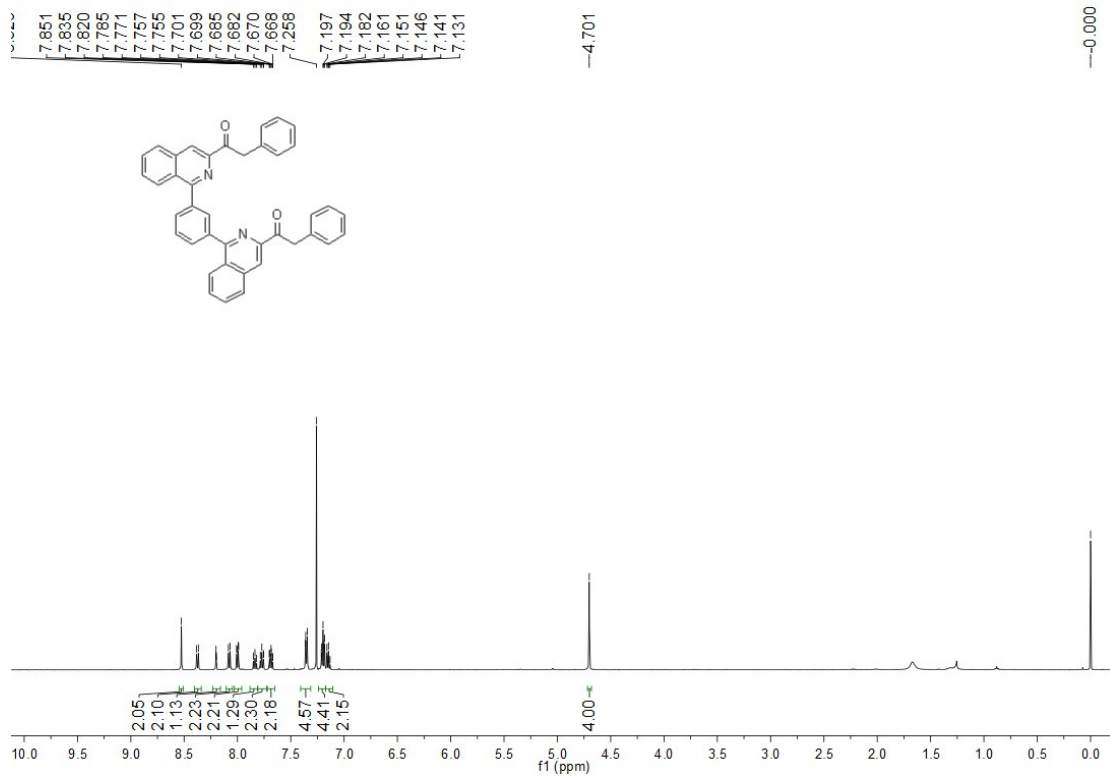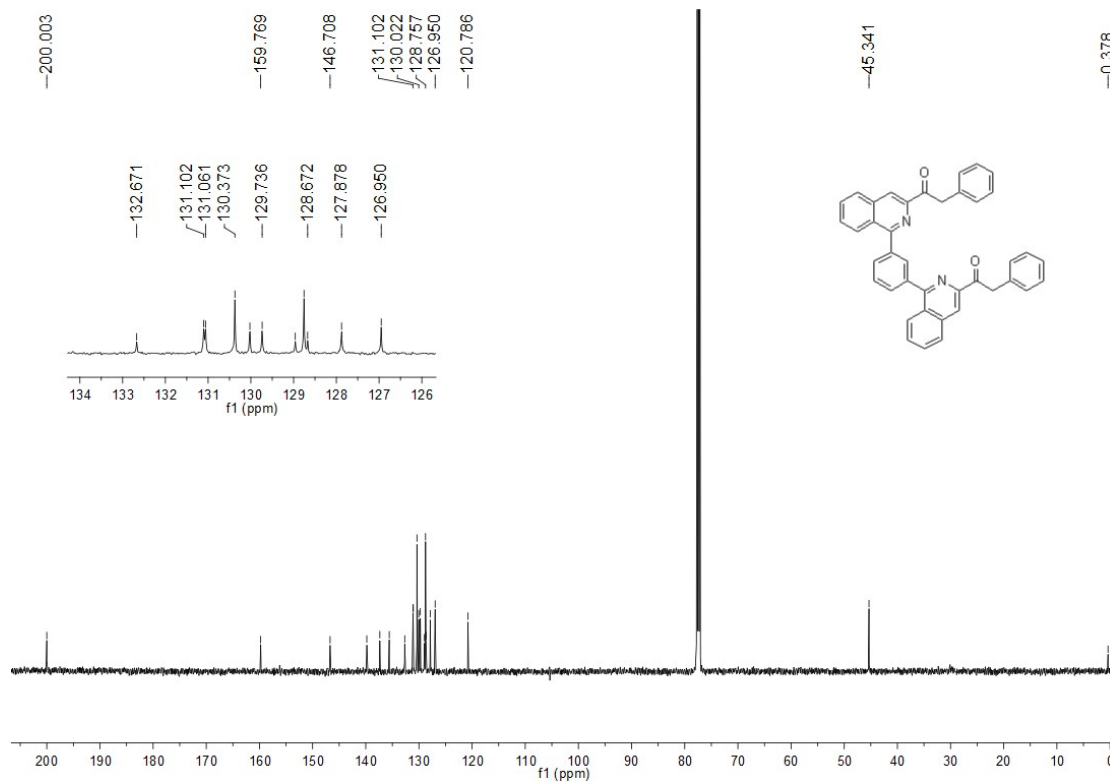

2v

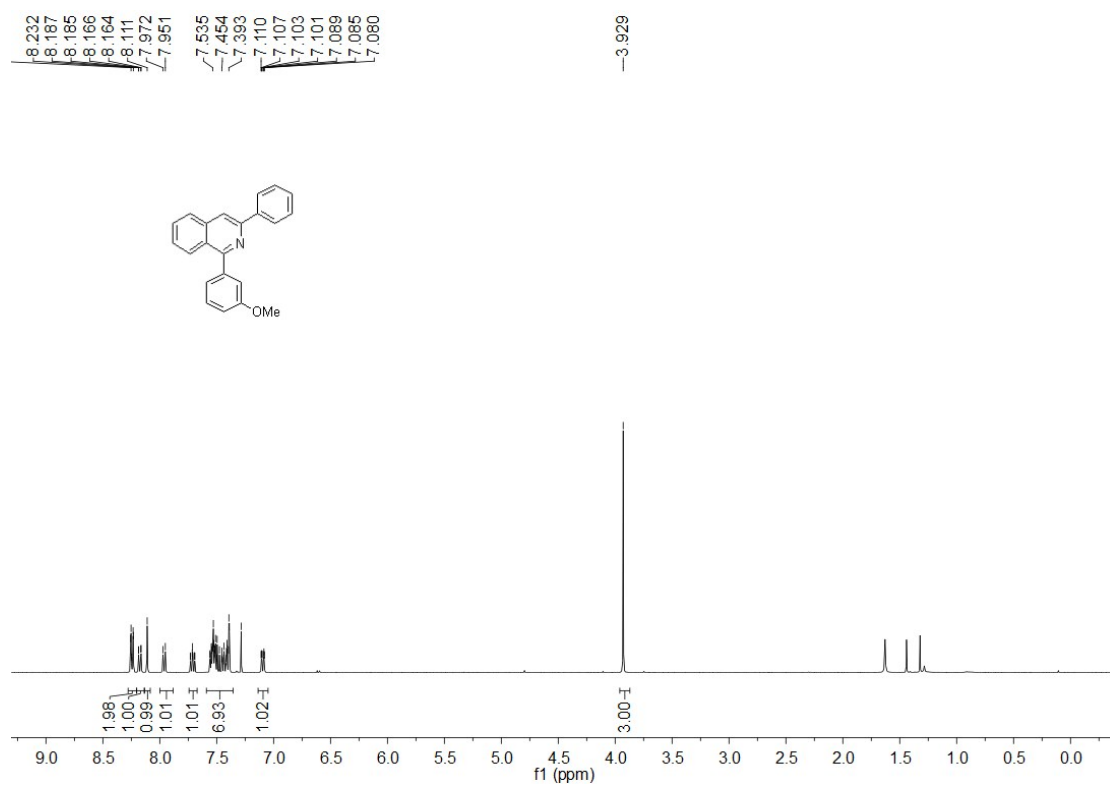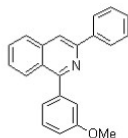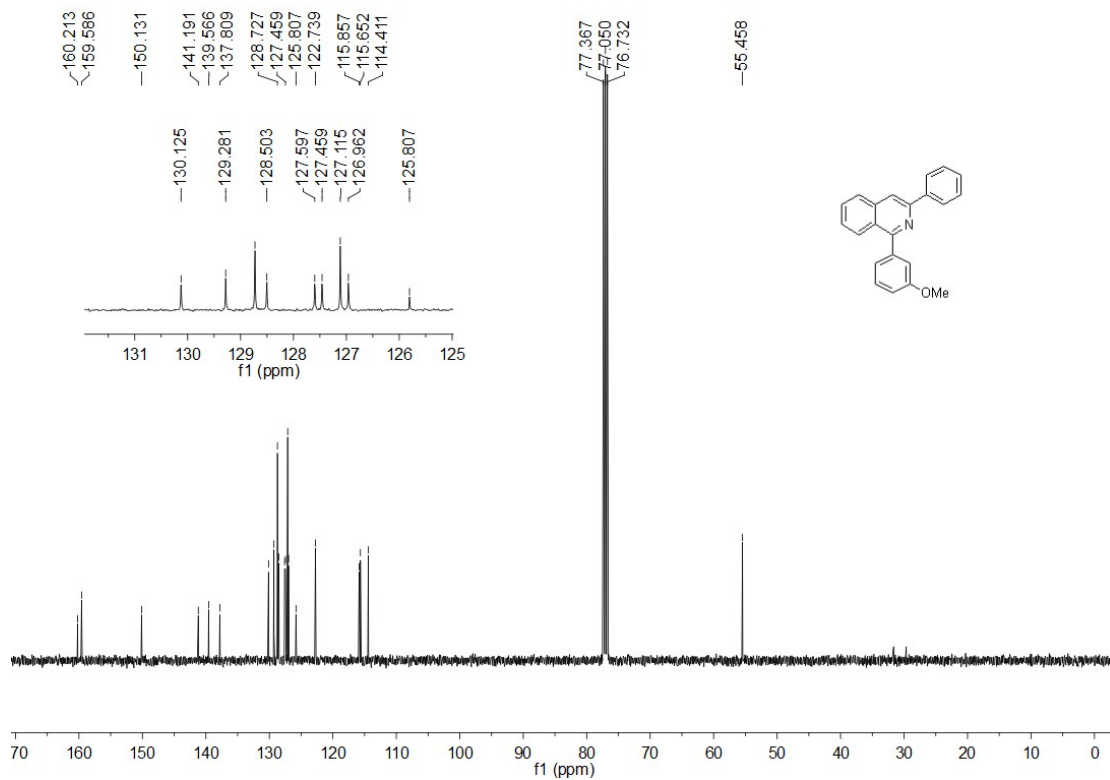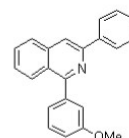

3a

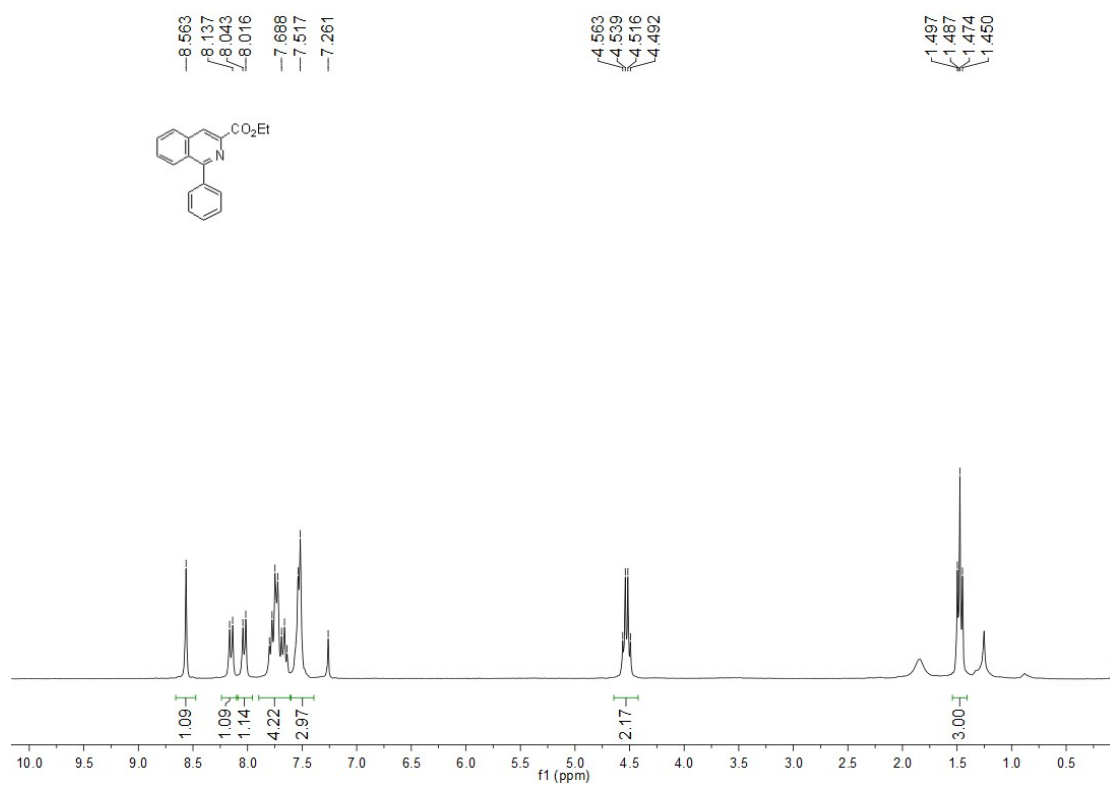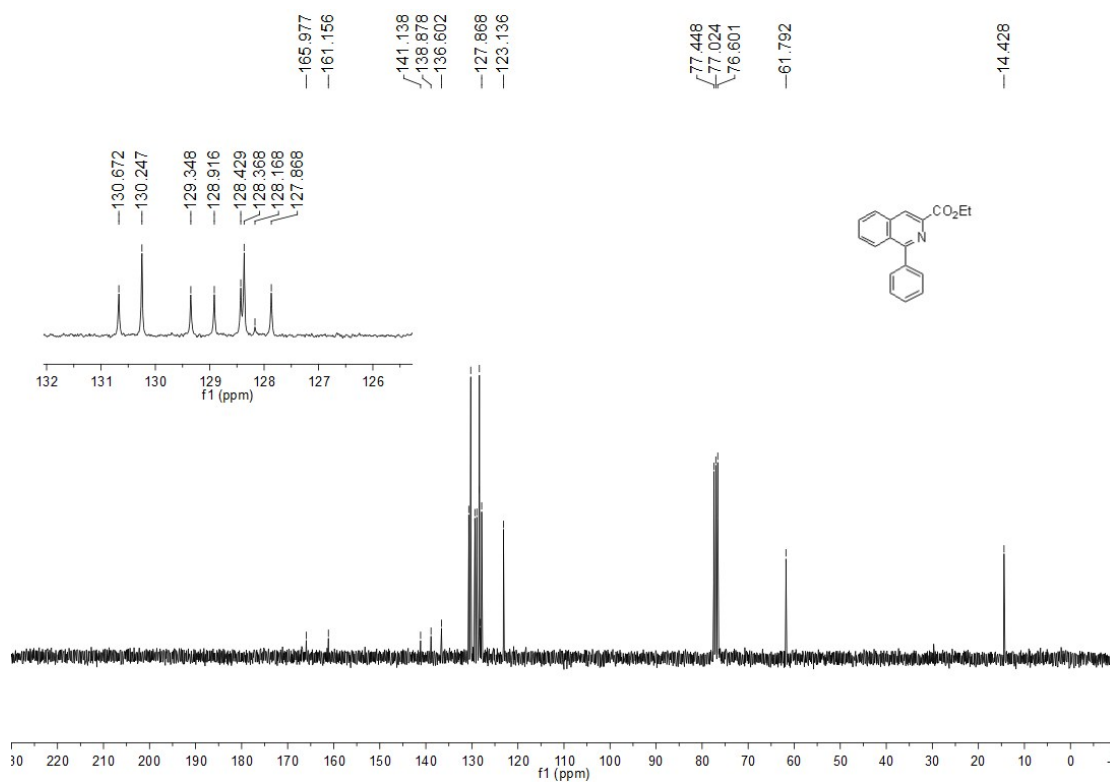

3b

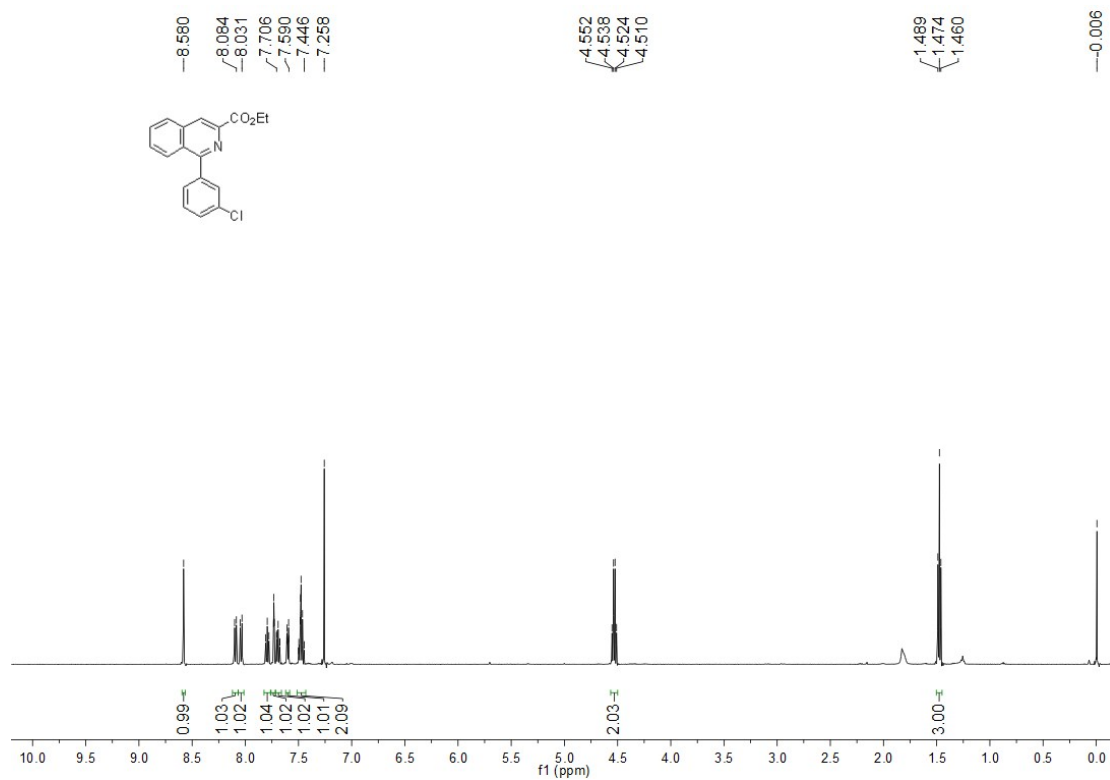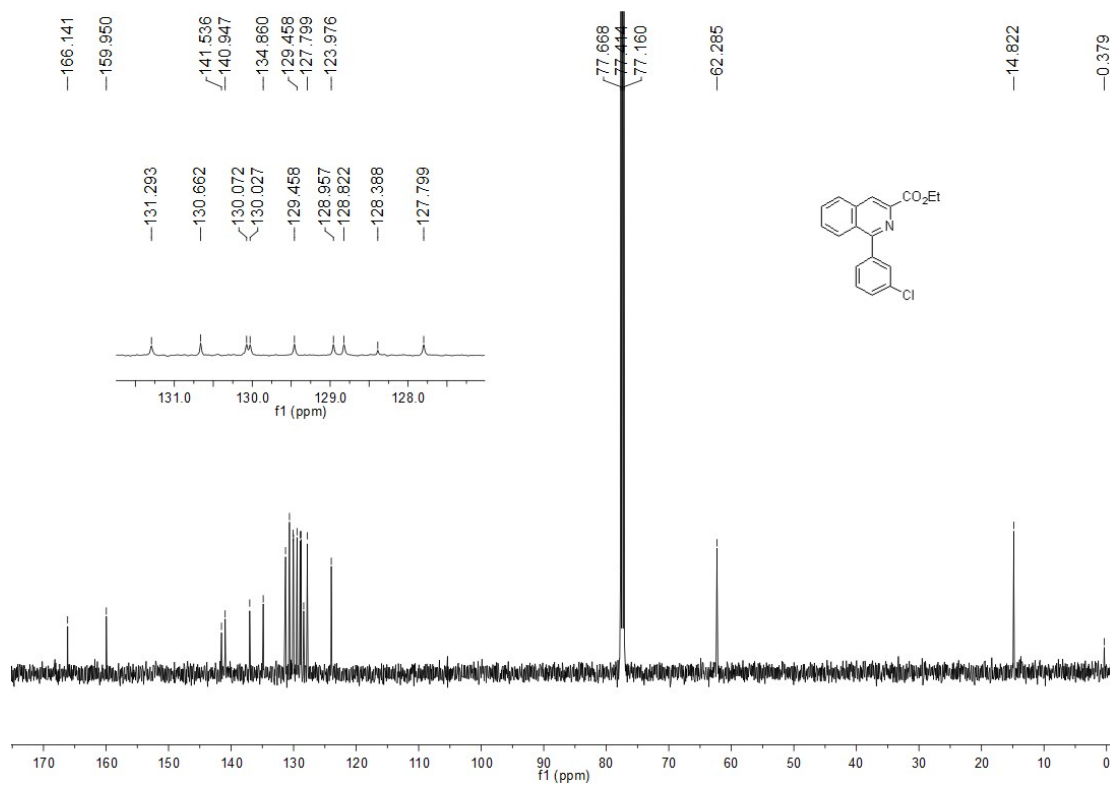



3c

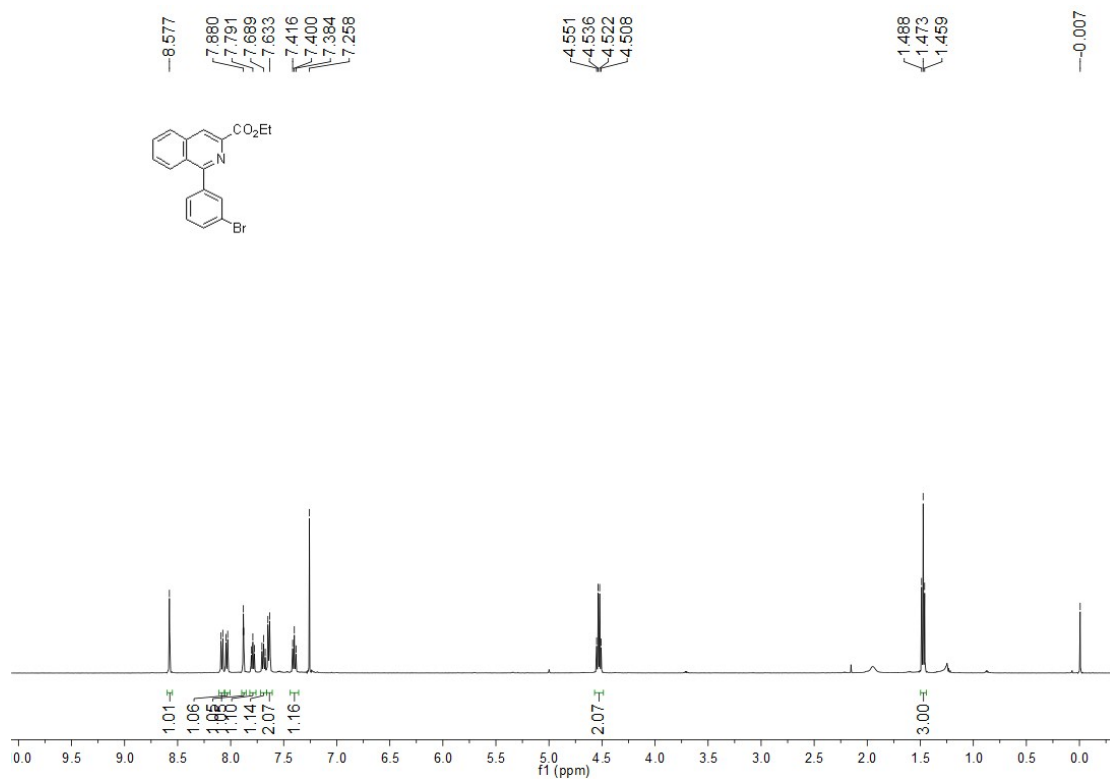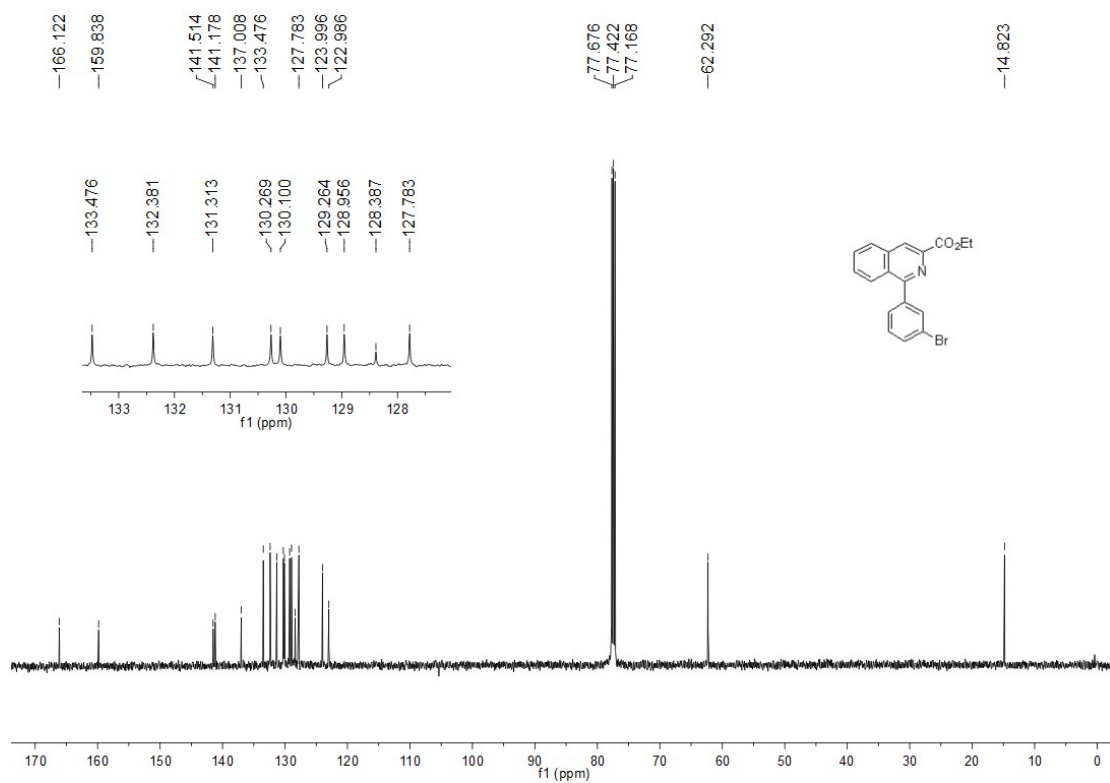

3d

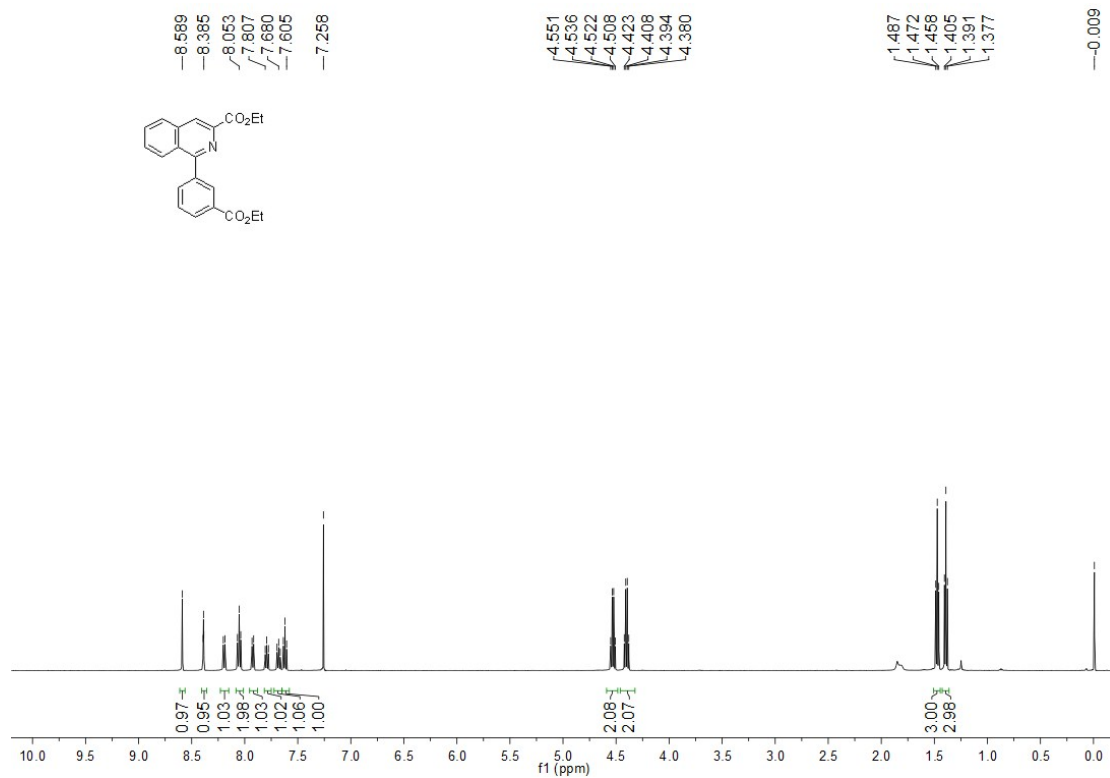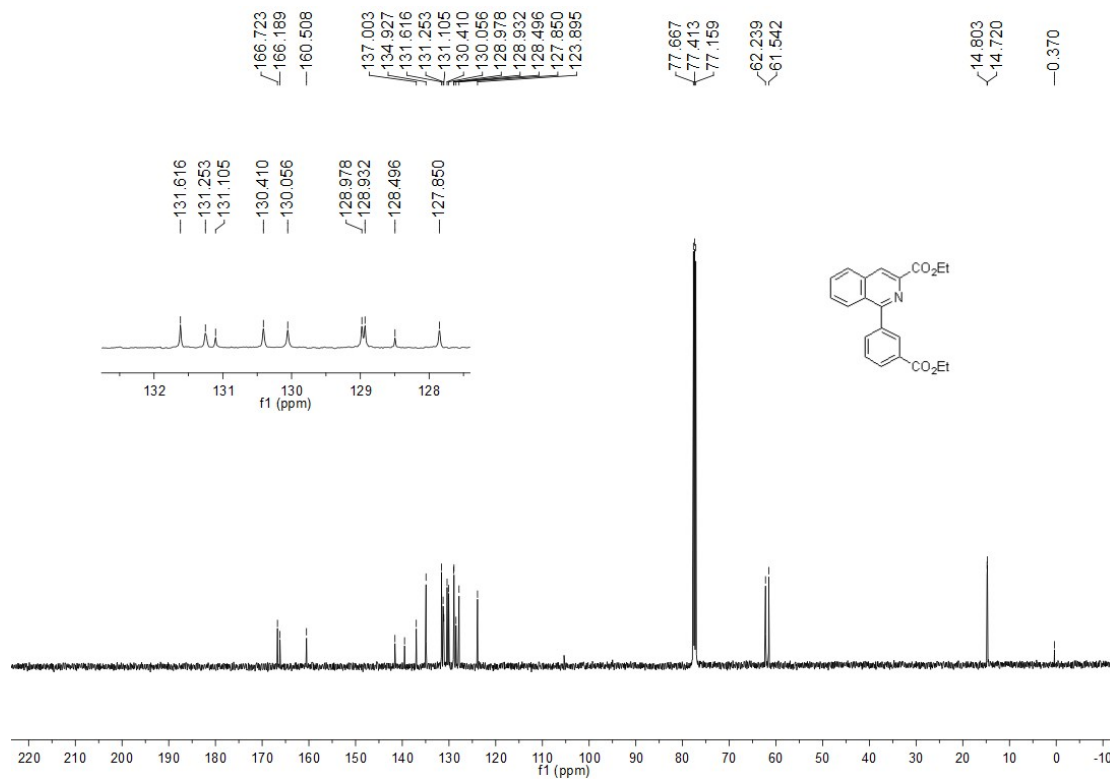

3e

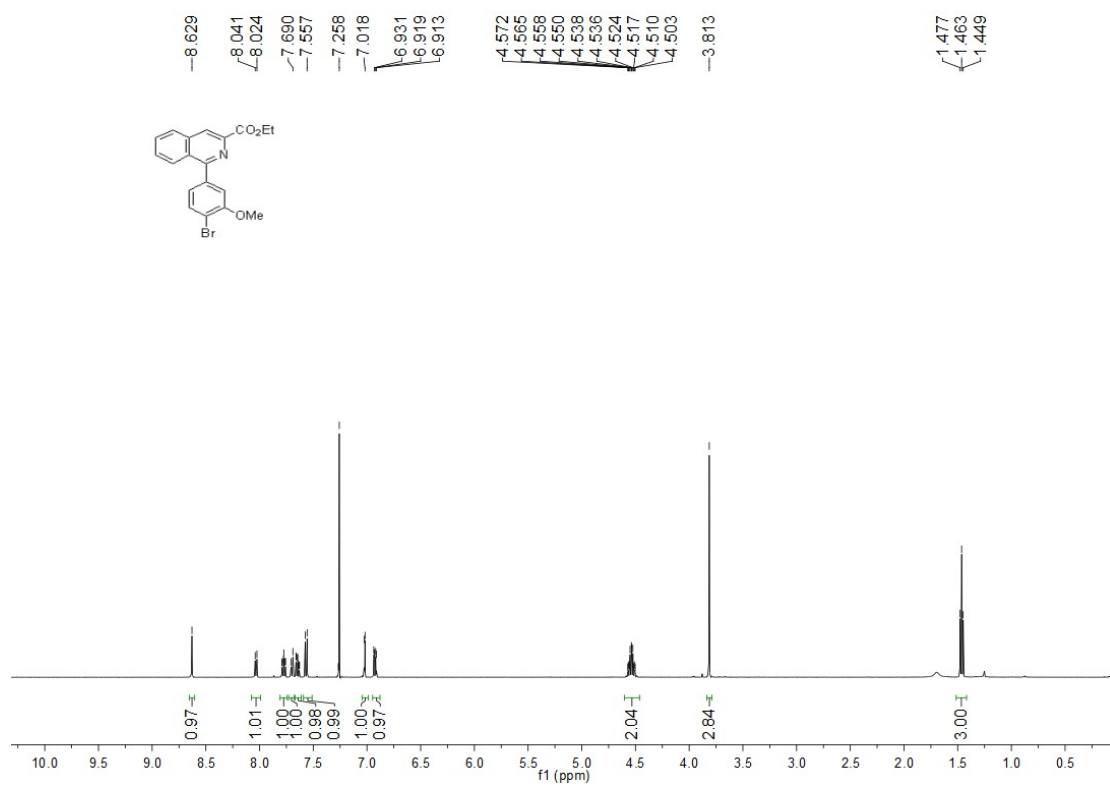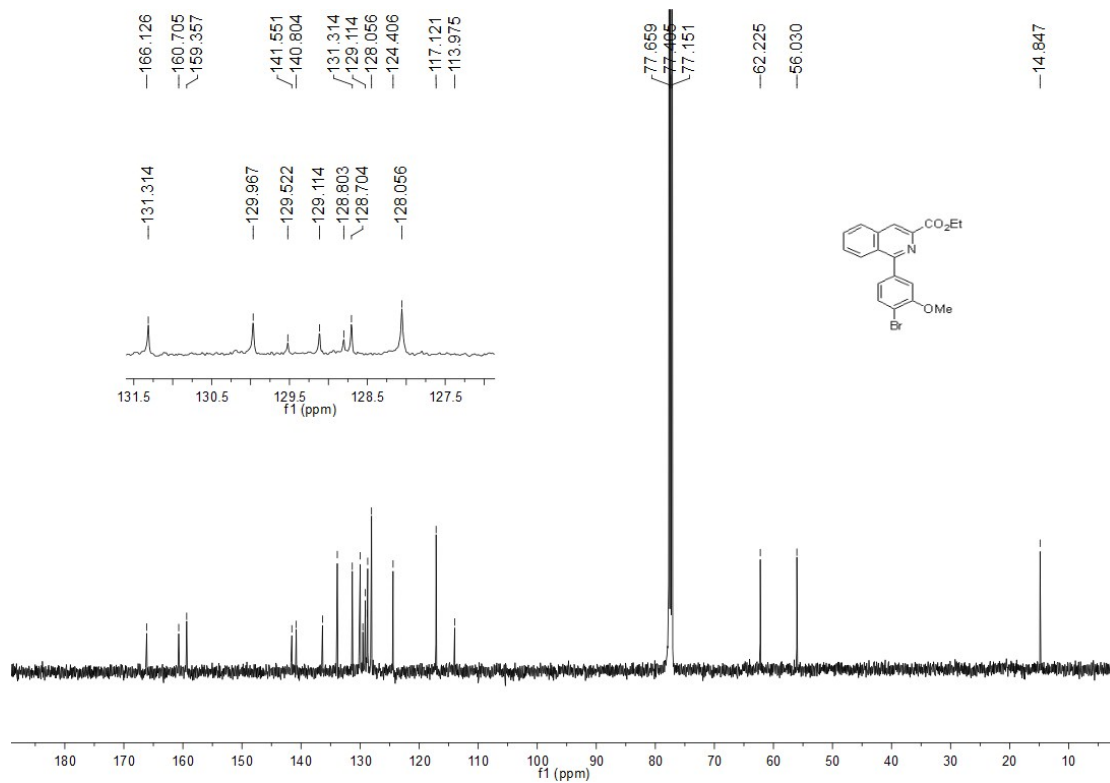

5a

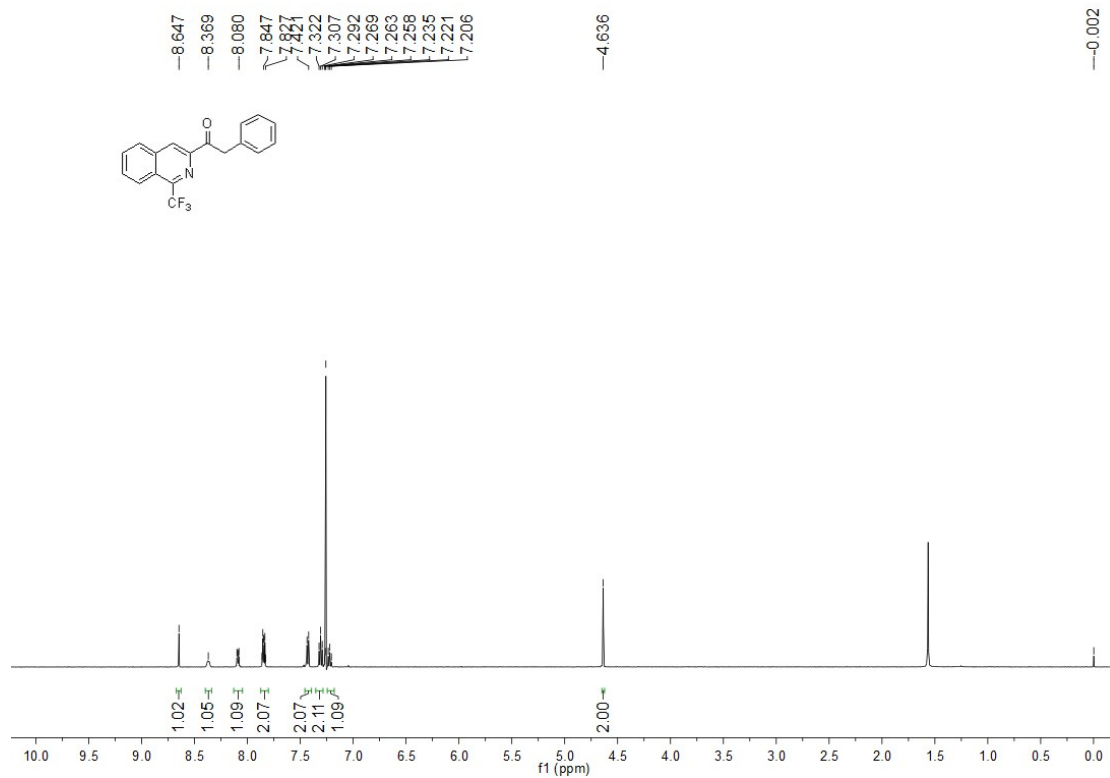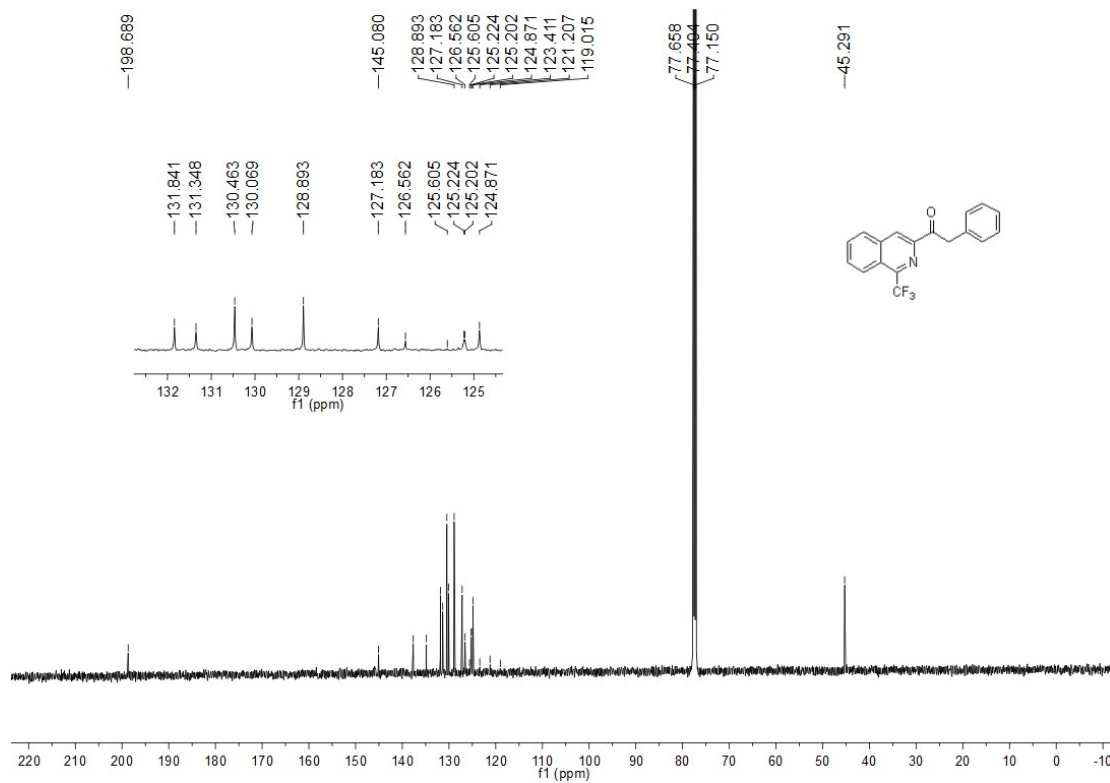

5b

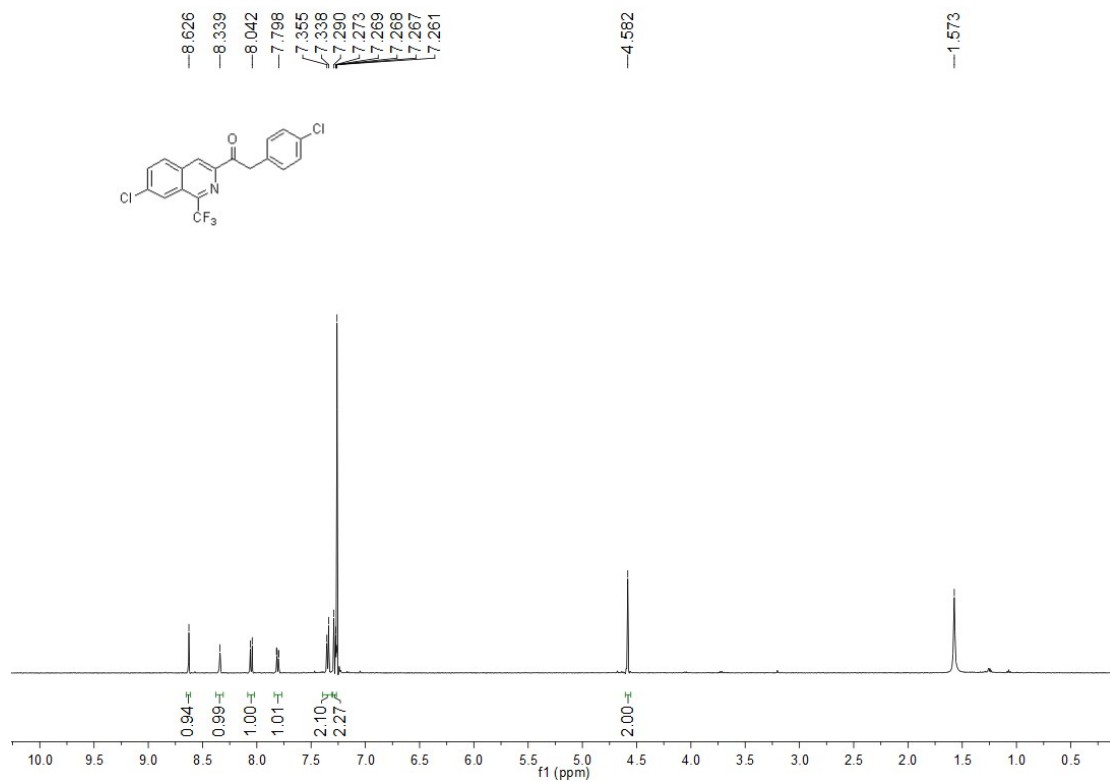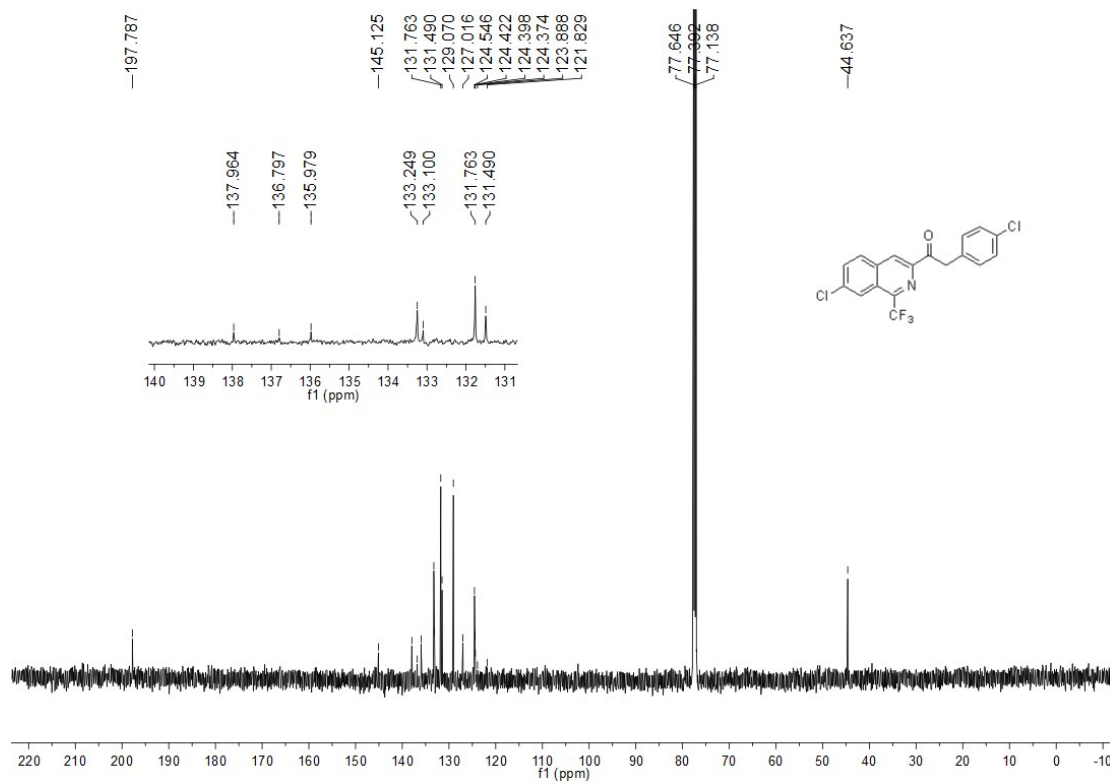

5c

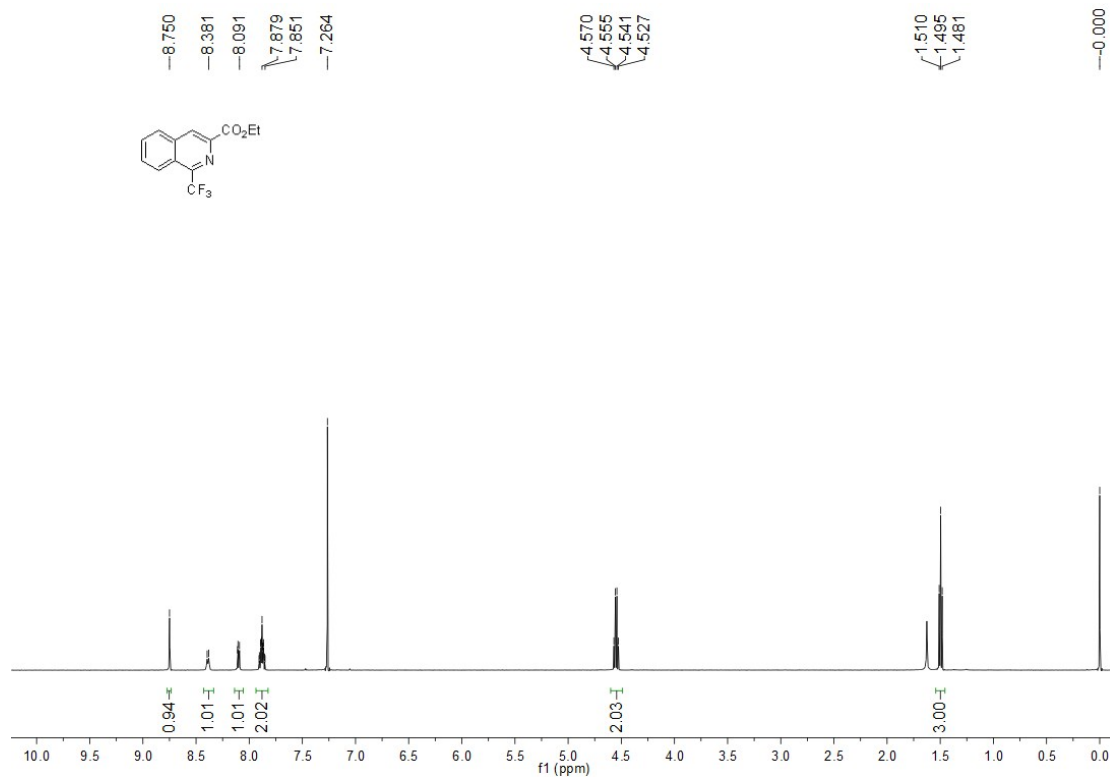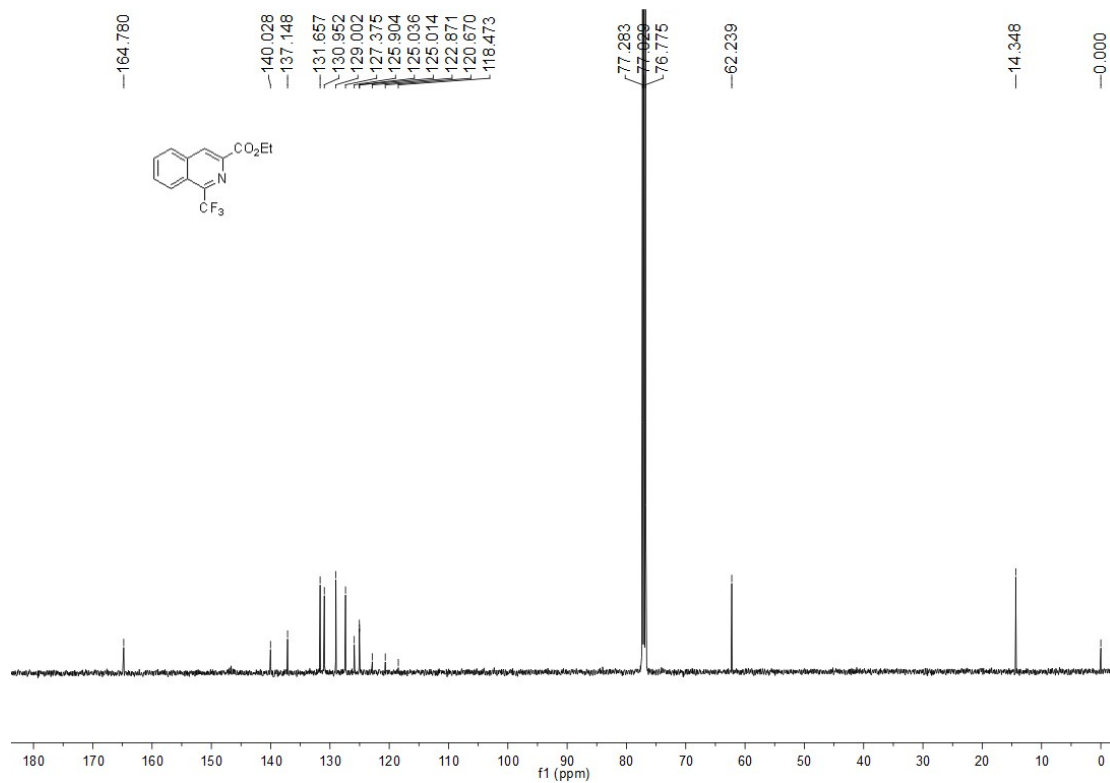

5d

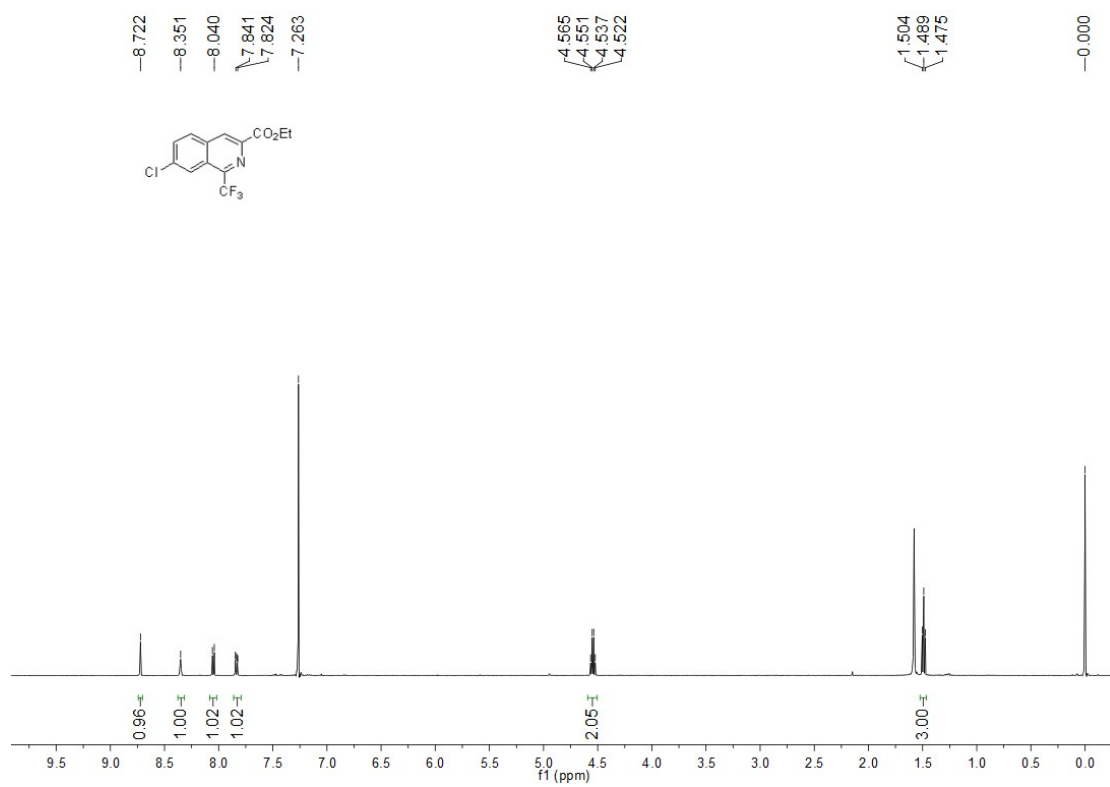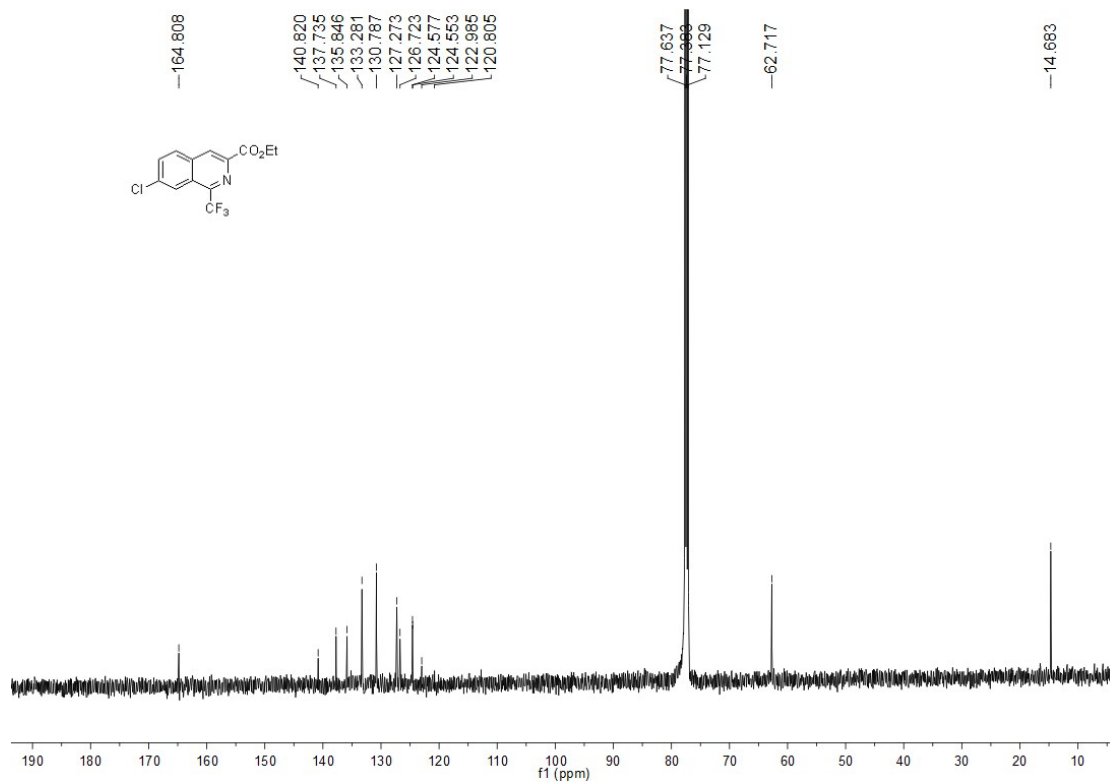

6

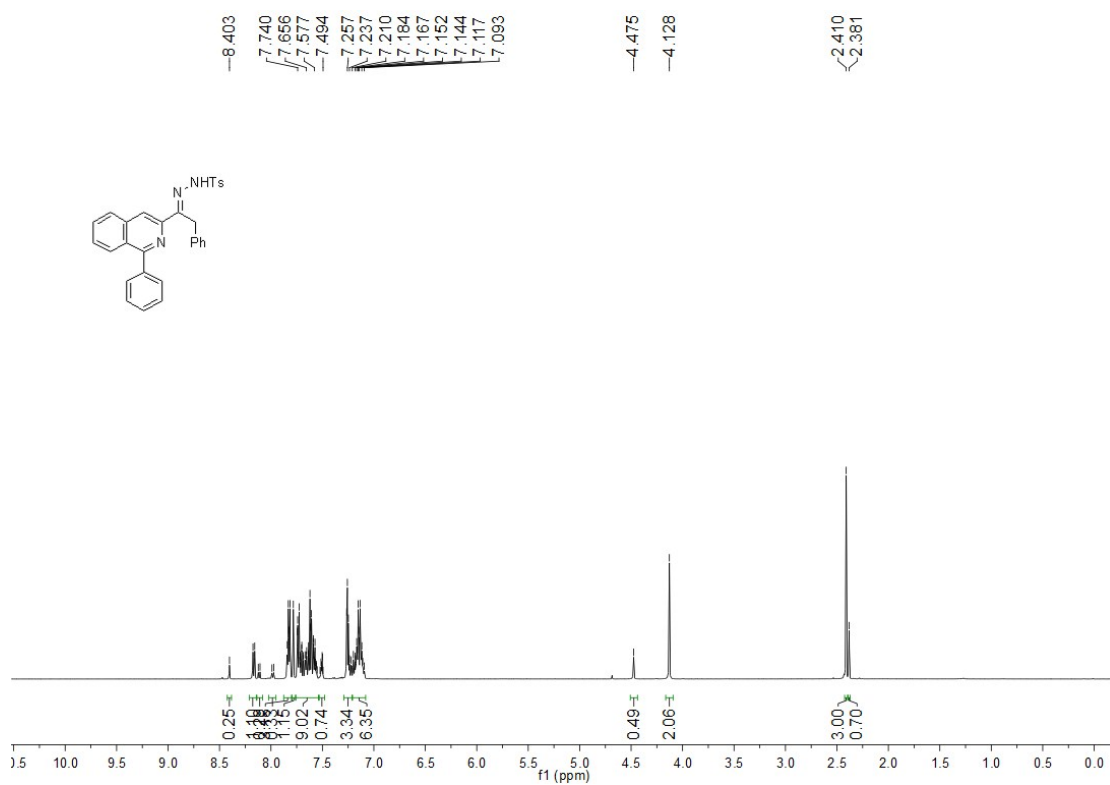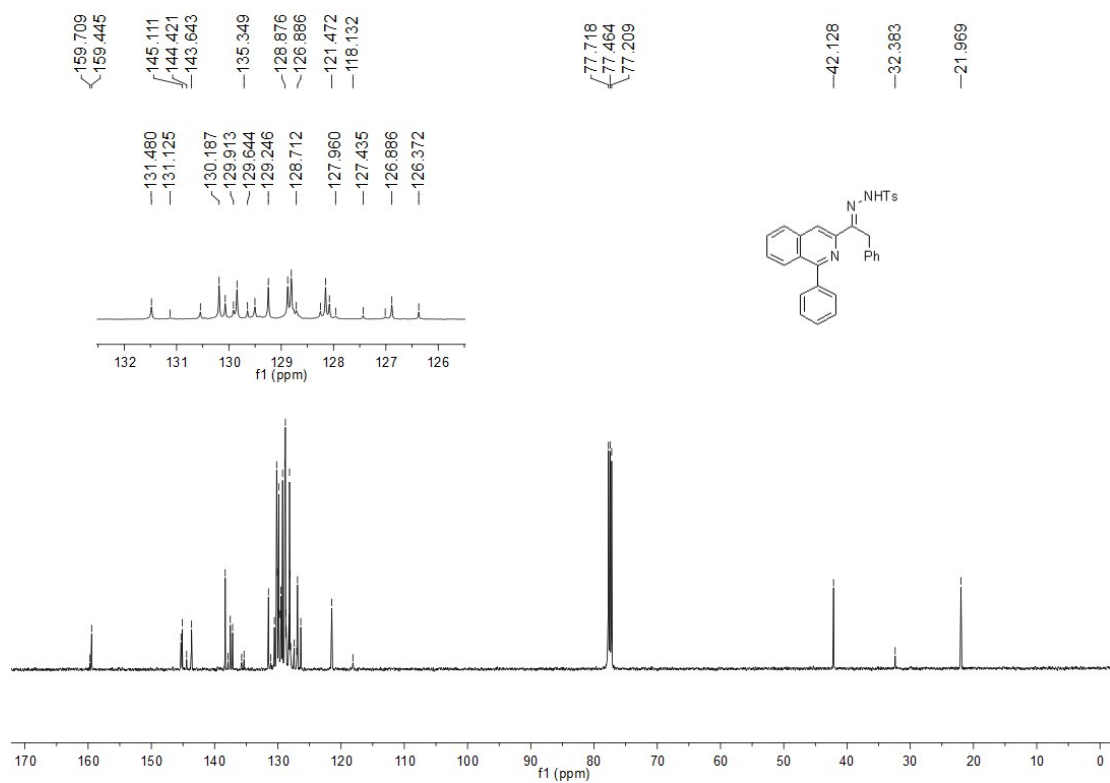



7

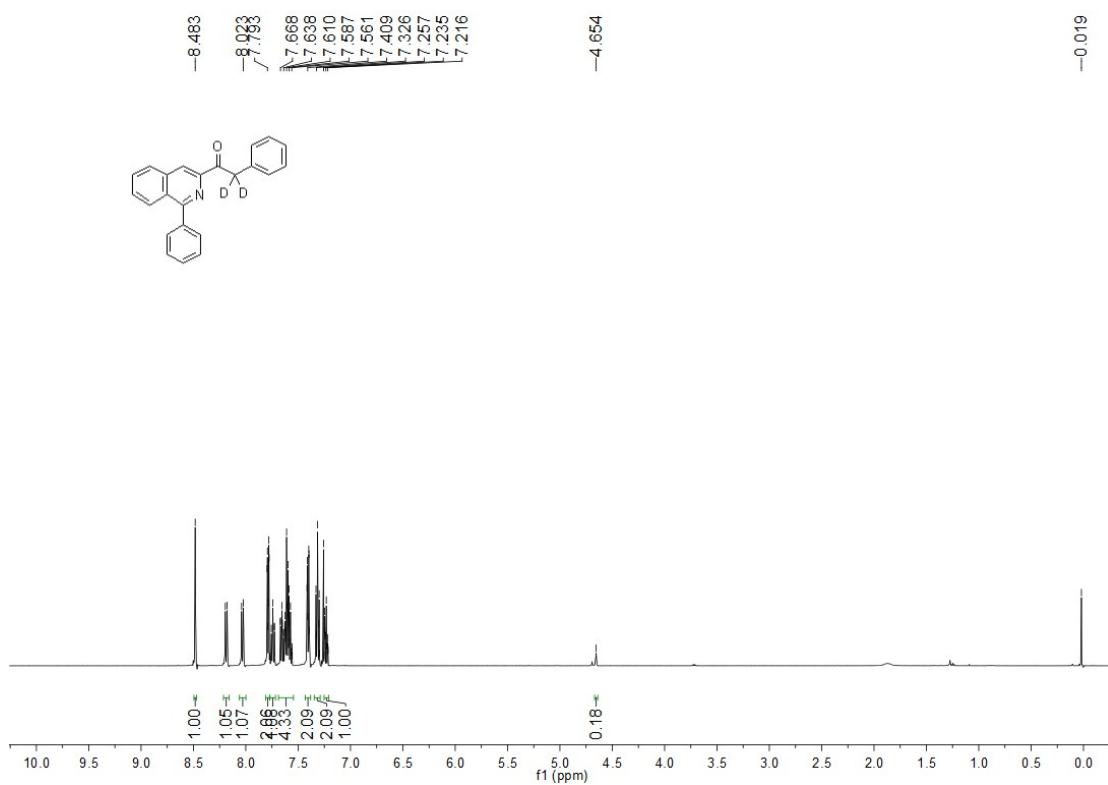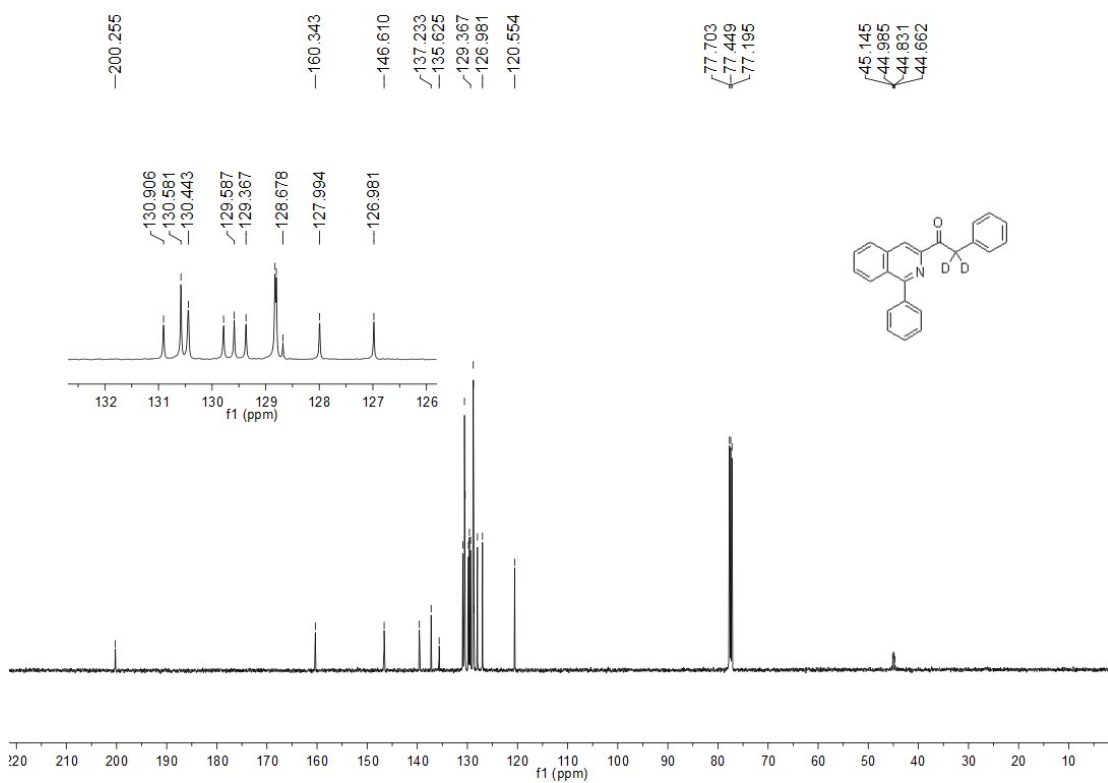

8

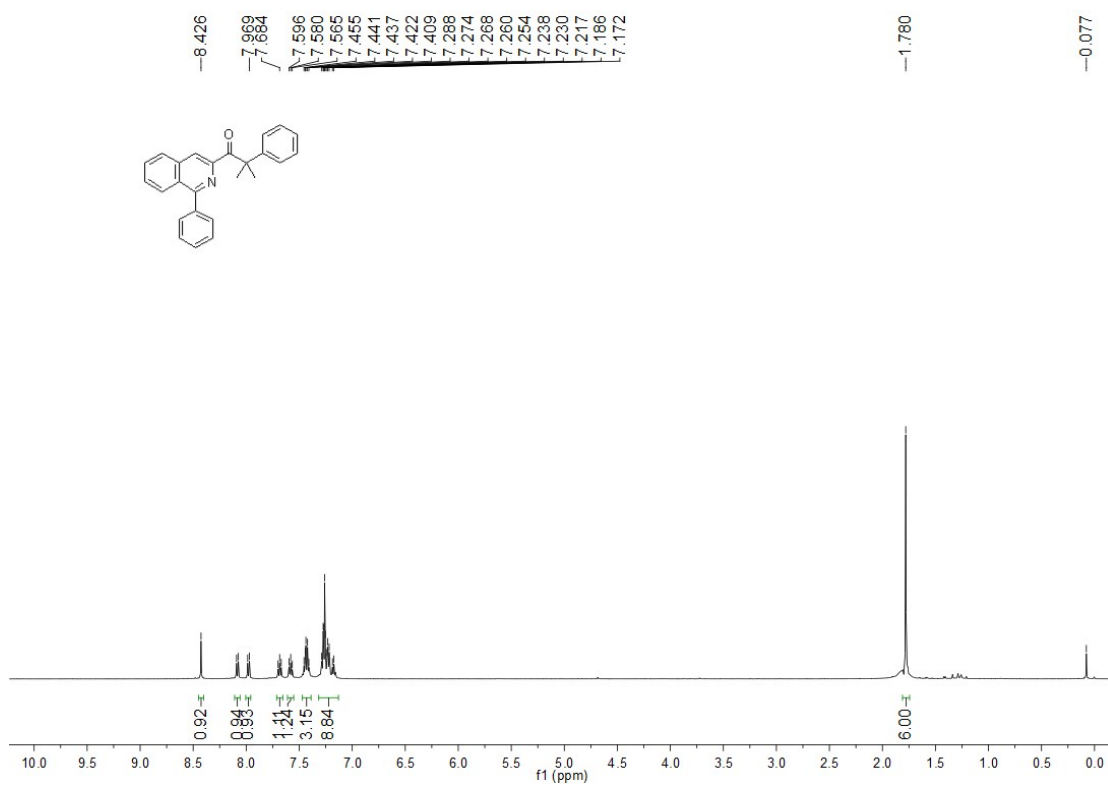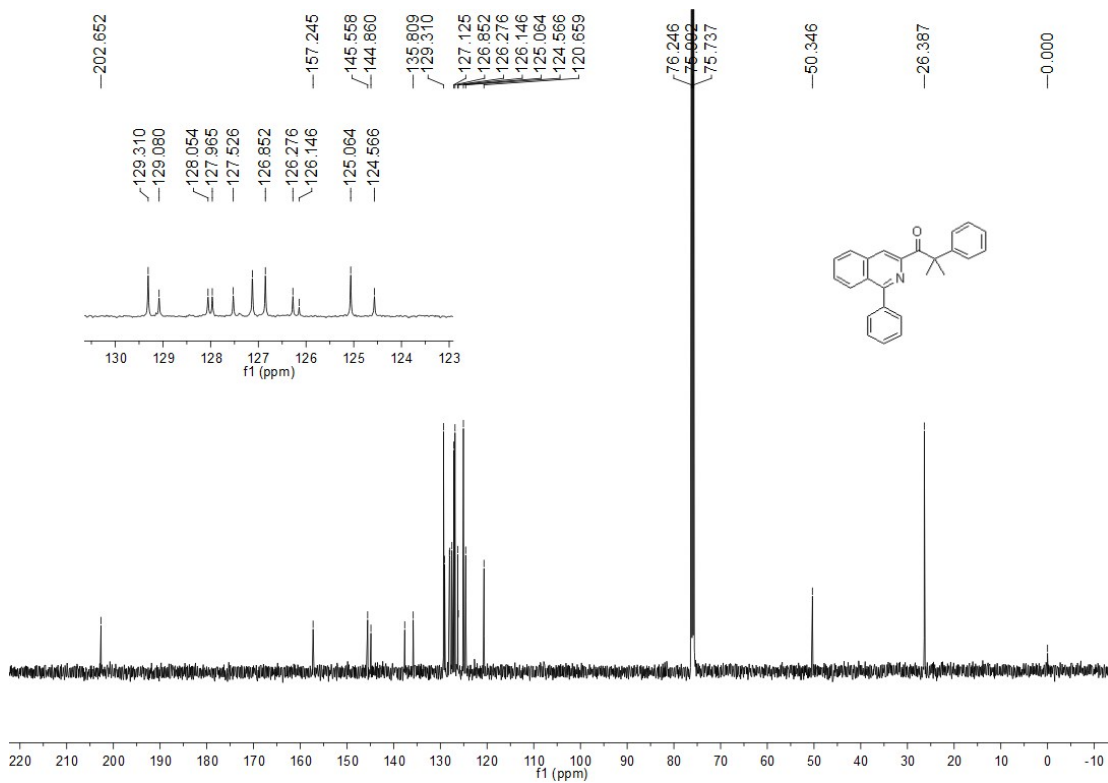

9

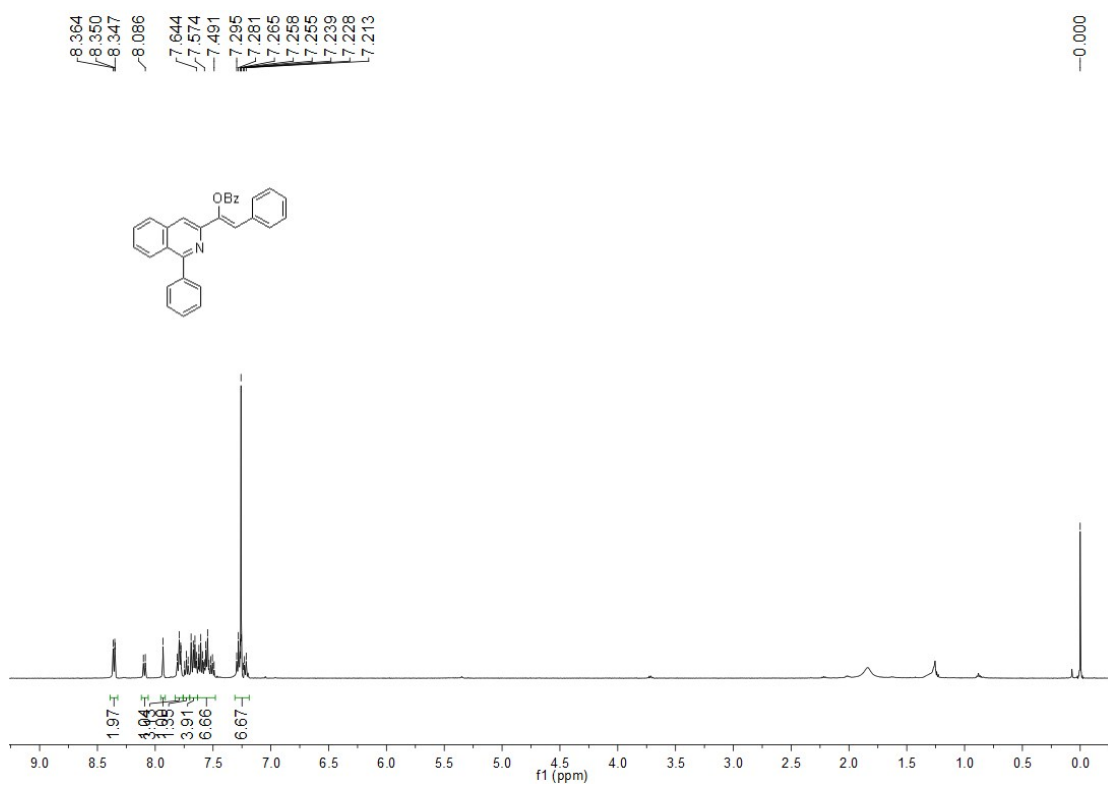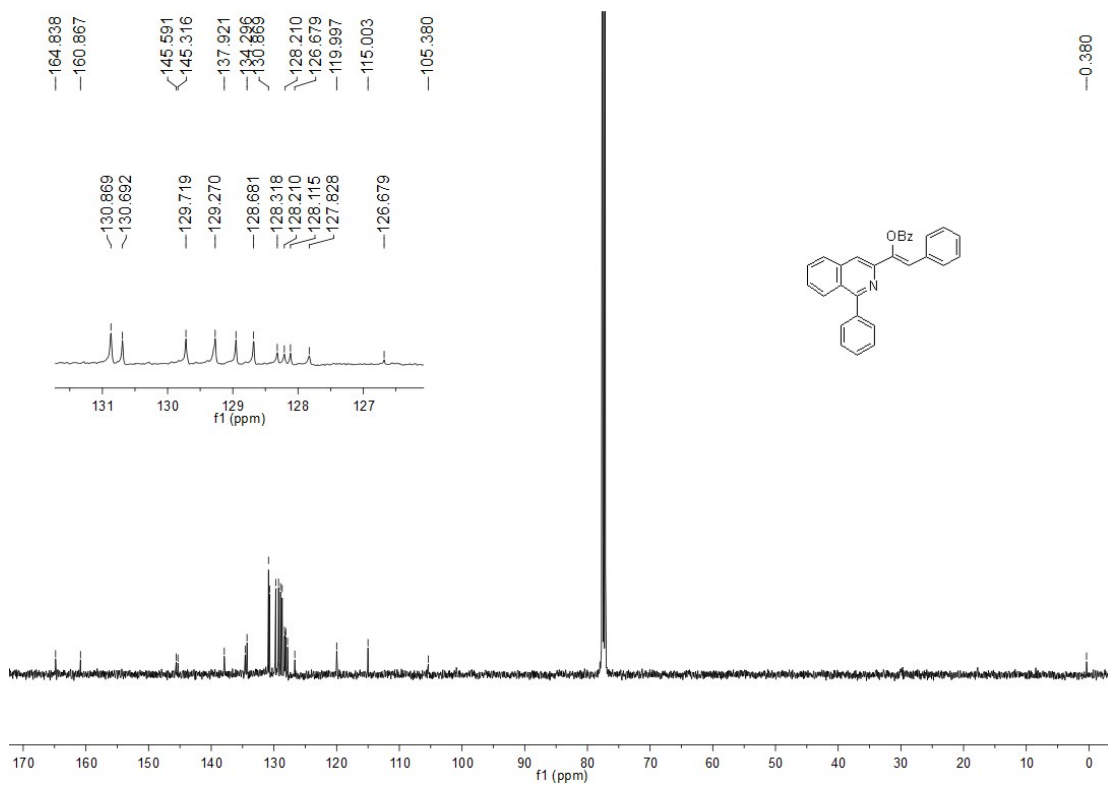

# IX. X-Ray Crystal of Compound 9

CCDC number: CCDC 1902347

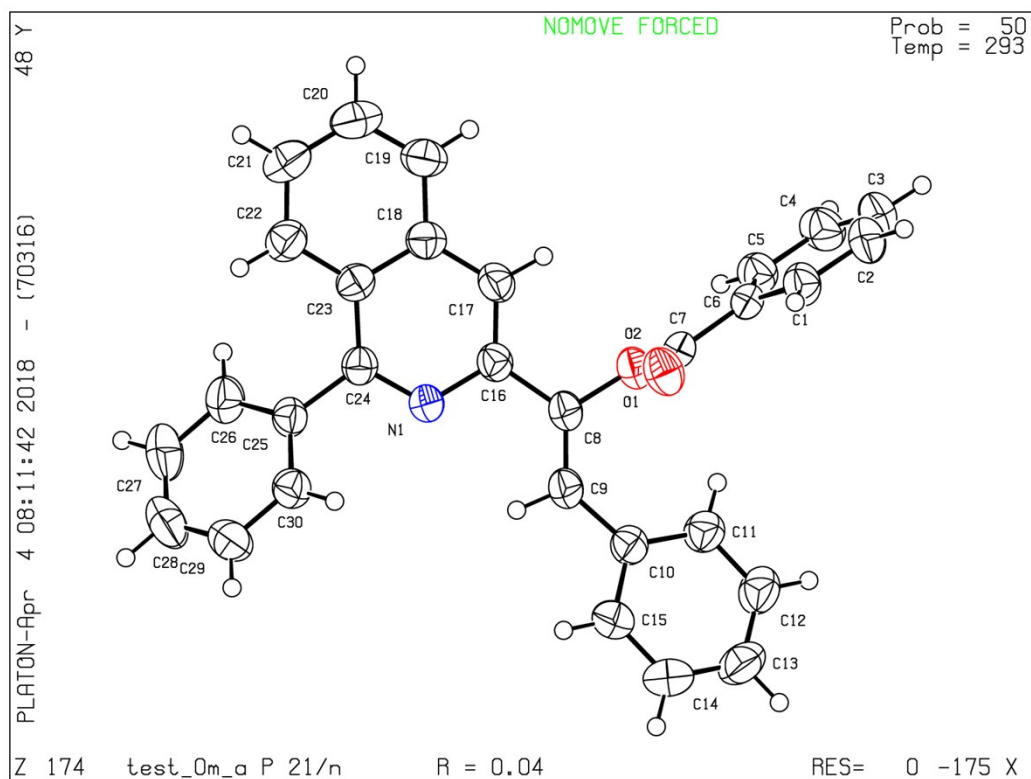

Supplement: c9qo00427k1.pdf [file c9qo00427k1.pdf]
